# Supplementary material for: Autotoxin affects the rhizosphere microbial community structure by influencing the secretory characteristics of grapevine roots
Source: Front Microbiol. 2022 Jul 26;13:953424. doi: 10.3389/fmicb.2022.953424 (PMC9360756; doi:10.3389/fmicb.2022.953424)
Supplement: Supplementary file 2 [file Data_Sheet_1.XLSX]

## Sheet: Sheet1
Category	Alignment	ESI Mode	Adduct	Metabolite	m/z	RT (s)	VIP	FC	P.value	CK1	CK2	CK3	CK4	CK5	CK6	T1	T2	T3	T4	T5	T6	QC01	QC02
Alcohols	Pos_02759	Positive	(M+H)+	Pantothenol	206.139	71.431	17.4526	3.11151	7.90871e-12	2.83323e+06	2.77193e+06	2.75438e+06	3.01416e+06	3.10616e+06	3.10362e+06	8.90802e+06	9.49597e+06	9.10452e+06	8.6315e+06	9.67845e+06	8.89267e+06	2.46926e+06	4.75059e+06
Alcohols	Pos_03113	Positive	(M+H)+	Pantothenate	220.118	260.138	1.38719	0.512866	7.64534e-07	83808.8	81173.1	76828.7	84937.3	90593.3	80391.9	34997.3	36471.8	38550.5	56333.5	43972.7	44944.6	101833	81020
Amino acids	Neg_00947	Negative	(M-H)-	L-Pyroglutamic acid	128.034	287.147	9.09799	0.223714	2.67165e-08	2.12261e+06	2.34341e+06	2.28158e+06	2.07583e+06	2.37153e+06	1.97395e+06	268624	307507	373532	819849	507564	668997	1.54356e+06	1.54273e+06
Amino acids	Pos_03543	Positive	(M+H-H2O)+	His-Pro	235.119	138.362	4.53184	0.365522	6.66607e-10	689421	606127	622310	666377	690401	697790	214742	254406	215463	239611	276221	251566	643431	481346
Amino acids	Pos_00547	Positive	(M+H-H2O)+	D-Ornithine	115.085	203.146	3.63021	0.116388	1.08109e-11	297090	299977	289937	303667	327488	296762	22706.9	31607.1	24204.3	56847.9	27768.2	48100	236682	203408
Amino acids	Pos_02400	Positive	(M+NH4)+	Val-Gly	192.138	34.9335	3.17049	2.86004	9.11235e-08	97145.2	64272.6	93430.5	137830	122575	160021	346781	325466	305670	304554	323264	325576	140945	143507
Amino acids	Pos_00556	Positive	(M+H)+	D-Proline	116.07	301.293	2.79996	0.564111	0.000401692	411196	449490	400086	428373	470250	372442	168948	157587	200032	367650	257035	276986	524626	427908
Amino acids	Neg_01007	Negative	(M-H)-	L-Isoleucine	130.085	264.828	2.76581	0.315055	4.23404e-05	181252	205805	200764	295103	324084	272832	70302.8	75738.8	85654	71922.9	100827	61785.1	135725	132632
Amino acids	Pos_02784	Positive	(2M+H)+	gamma-Aminobutryic acid	207.137	35.6895	2.60676	1.61031	3.89235e-06	208723	210698	221527	259753	276097	262653	354780	361091	408330	422181	390599	380983	326301	334202
Amino acids	Pos_02740	Positive	(M+H)+	Val-Ser	205.117	283.252	2.57829	7.09293	1.60792e-06	11813.8	8079	8050.1	92629.1	8869.63	9374.41	165878	169694	157136	169796	165401	156709	10466.7	8526.25
Amino acids	Neg_02106	Negative	(M-H)-	L-Phenylalanine	164.068	249.01	2.27989	0.258892	3.00469e-09	146837	155258	146803	139585	148295	125255	28212.6	27907.9	33880.3	49354.8	39742.4	44075.5	103461	98660.6
Amino acids	Neg_00659	Negative	(M-H)-	L-Valine	116.07	291.382	2.27536	0.259924	7.14265e-08	134356	157358	153687	139187	157333	125326	23941.1	25541.7	32033.1	57016.8	38459.7	48426.3	100734	106548
Amino acids	Pos_03975	Positive	(M+H)+	Lys-Cys	250.128	395.873	2.22777	2.92024	3.72511e-08	48932	38128.6	46943.7	58774.1	66650.7	61786.4	144924	173025	171088	154882	141695	152412	87026.6	76055.9
Amino acids	Pos_00892	Positive	(M+H)+	L-Norleucine	132.101	41.747	2.104	7.01224	1.01458e-11	13171.2	12330.6	14070	17949.2	16368.9	15956.9	108713	113982	99256.4	105410	105069	97597	55273.2	46903.8
Amino acids	Pos_00524	Positive	(M+H)+	Creatinine	114.065	164.574	2.041	2.33488	4.19838e-11	63310.7	62066.2	61410	63855.1	63919.7	66410.1	142583	152817	144738	140573	158081	150732	111708	87957.9
Amino acids	Neg_05336	Negative	(2M-H)-	L-Cysteine	241.029	86.51	1.80418	2.46484	2.51691e-06	48327.4	58833.5	44761.4	44675.9	45975	41815.9	90820.3	101203	128405	123221	123933	133390	82794.2	78334.8
Amino acids	Pos_05630	Positive	(M+NH4)+	Phe-Glu	312.156	257.087	1.7801	4.88123	1.88139e-10	16765.2	14235.1	15234.5	17679.6	15832.2	20013.4	81450.2	89016	77988.8	78595	86584.2	73316.5	45253.9	32400.8
Amino acids	Pos_02047	Positive	(M+H-H2O)+	N-Acetyl-L-Histidine	180.08	36.456	1.7335	2.50615	1.29001e-09	39416.5	36965.6	36364	48282.8	42337.7	41425.8	96622	109819	108581	101790	98738.2	97937.8	65912.2	31211.9
Amino acids	Pos_01198	Positive	(M+H-2H2O)+	DL-O-tyrosine	146.059	250.97	1.70987	8.59886	9.13962e-10	7555.58	7761.77	7240.23	7515.38	8968.81	8159.98	62146.8	73649.2	60577.2	65763.4	77690.9	66053.8	9862.7	7731.39
Amino acids	Pos_01952	Positive	(M+H)+	L-Citrulline	176.102	382.699	1.67676	0.420456	0.000312112	93095.6	113680	105614	119246	145617	95863.1	26529	27620.2	37236	86203	47562.6	57864.8	111010	118283
Amino acids	Pos_03903	Positive	(M+NH4)+	Pro-Asn	247.14	340.411	1.66404	0.18283	1.20954e-07	62164	73390.2	67744.5	69262.3	86546.5	61021.4	7806.04	8257.55	10566.4	21222.2	12756	16203.8	64014	58363.3
Amino acids	Pos_03444	Positive	(M+H)+	Val-Ile	231.17	193.905	1.65056	0.150627	3.6009e-12	65298.1	63327.8	61572.5	64122.4	71133.1	64659.1	9455.48	9143.47	8678.96	11629.9	8449.19	11404.7	51154.3	42981.6
Amino acids	Pos_02319	Positive	(M+H)+	N.alpha.-Acetyl-L-lysine	189.123	377.696	1.5287	0.572967	0.000725377	122392	132637	117192	139572	160961	111097	67129.4	53426.9	65897.1	117277	70119.7	75271	136463	149442
Amino acids	Neg_04409	Negative	(M-H)-	Allocystathionine	221.065	21.235	1.5234	0.409855	2.36313e-06	91285	74281.9	71041.2	87358.6	99706.6	76860.3	44141.2	34497.5	28837.6	37328.8	29554.3	30786.9	46739.1	46449.6
Amino acids	Pos_03374	Positive	(M+H)+	L-leucyl-L-proline	229.154	109.394	1.52037	5.32353	6.68472e-06	10863.5	9641.19	13149.3	10138.6	10335.5	15130.9	57281.3	35550.3	65018.6	68583.4	76818.8	65449.8	33928.9	35633.5
Amino acids	Pos_01363	Positive	(M+H-2H2O)+	N-Acetylglutamine	153.065	88.515	1.49009	1.9674	0.000195035	60815.7	51251.7	35078.6	60645	65614.6	44288.1	70959.3	124718	104422	101990	118437	104504	99594.6	43840.2
Amino acids	Pos_02909	Positive	(M+H-H2O)+	Pro-Asp	213.087	289.889	1.39966	3.27133	4.52117e-08	16755.3	18665.2	13648.4	23292.3	15121.3	19557.9	53446.3	66248	60095.6	63625.4	51847.4	54902.4	39838.1	33474.1
Amino acids	Pos_01730	Positive	(M+Na)+	Isobutyrylglycine	168.064	243.525	1.39776	2.4411	2.09257e-10	28112.3	25499.4	25698.8	28957.2	30143.3	27719.7	63248.9	66176.8	64771.3	70288.4	72016.8	69038.7	36050.6	31137.4
Amino acids	Pos_04289	Positive	(M+H)+	Ile-Glu	261.145	284.537	1.30191	2.6064	1.95731e-08	22123	19977.5	20314.9	21585.2	22602.2	23656	59208.2	56419.1	61707.6	52345.9	61130.4	48694.4	38719.4	33036.3
Amino acids	Pos_03367	Positive	(M+H-H2O)+	gamma-L-Glutamyl-L-valine	229.118	233.234	1.21001	0.450011	9.03913e-09	56760.2	53252.8	53066.5	53259.5	59089.5	53365.4	24104.3	24162.9	25056.4	29122.3	26731.6	18783.3	53200.5	47610.4
Amino acids	Pos_03087	Positive	(M+H)+	Val-Thr	219.137	209.785	1.18137	2.24134	7.70072e-05	11100.7	25160.8	26827.6	30112.2	28159.7	32051.3	62114.1	38127.7	63049.1	61012.2	61276.9	58269.6	46382.9	37873.9
Amino acids	Pos_00824	Positive	(M+H-H2O)+	L-Lysine	129.101	399.761	1.14173	2.09085	2.57645e-09	23822.7	22968.9	21938.7	25758.7	26749.2	25772.3	48837	54735.2	49896.5	51838.7	54014.2	48054.9	36428.1	30465.8
Amino acids	Pos_01299	Positive	(M+H)+	L-Methionine	150.057	277.42	1.13996	2.06569	3.25199e-05	20339.3	39855.5	22605.5	15265.5	34124.2	31333.2	53917.1	51326.4	55383.2	56968.6	61535.7	58657.7	22212.2	17257.4
Amino acids	Neg_00439	Negative	(M-H)-	DL-Serine	104.034	367.694	1.13538	0.300541	1.29753e-06	30308.4	40227.6	39405.9	42260	44721.8	35465.6	7989.87	9188.09	9169.99	18812.9	12072.9	12608.8	27411.7	36791.1
Amino acids	Pos_04585	Positive	M+	Arg-Val	273.181	298.388	1.11654	3.16518	4.50224e-10	12058.8	10460.8	11360.2	12626.4	11428.3	12450.2	36075.4	37568.1	37855.3	34886.2	41572.2	34823.1	26430.6	18963.3
Amino acids	Pos_00138	Positive	(M+H-2H2O)+	DL-2,4-Diaminobutyric acid	83.0592	87.894	1.0216	2.09126	0.0356307	33771.2	21424.6	25108	34152.9	37283.5	36815.6	42236.6	125196	42165.4	55185.5	87317.8	42218.1	47362.7	24242
Amino acids	Pos_01826	Positive	(M+H-H2O)+	N6-Acetyl-L-lysine	171.112	366.95	1.01922	2.64464	1.13484e-06	12579.2	12579.8	11933.8	14518.7	14359.1	14045.3	36730.4	35802	44327.4	32897.1	31294.6	30561.7	22045	17832.4
Amino acids	Neg_05468	Negative	(M-H2O-H)-	L-phenylalanyl-L-proline	243.109	27.933	1.01059	2.03425	0.00152276	37756.4	13935.2	12669.6	8851.62	39084.3	37196.6	51857	50417.4	46402.1	51140.5	51877.5	52412.8	52117.1	47406.5
Esters	Pos_04743	Positive	(M+H)+	Phthalic acid Mono-2-ethylhexyl Ester	279.161	32.1105	8.53539	1.4499	0.0312414	4.45905e+06	3.28175e+06	5.09027e+06	6.28186e+06	6.37503e+06	6.7115e+06	1.05189e+07	6.80277e+06	8.39406e+06	5.09713e+06	6.73135e+06	9.14163e+06	3.43531e+06	5.2755e+06
Esters	Pos_00915	Positive	(M+H)+	Ethyl 3-hydroxybutyrate	133.085	62.926	2.44365	1.41914	4.81355e-06	309619	271502	285685	318588	337603	313006	406175	465696	426099	428762	467271	411551	149031	360527
Lipids	Neg_11609	Negative	(M-H)-	Cholic acid	407.278	30.814	2.70791	0.0503572	0.0370617	395539	633791	408122	105232	19771.3	13166.6	18789.3	7090.64	6355.67	21636	7061.72	18410.6	28657.2	39173.3
Lipids	Neg_12887	Negative	(M+CH3COO)-	Chenodeoxycholate	451.313	154.7	2.31296	0.167324	5.61672e-15	132075	131090	128049	133896	131848	124233	21898.4	21379.9	19961.8	22409.2	22759.1	22303.4	91275	97576
Lipids	Neg_09687	Negative	(M-H)-	Estrone 3-sulfate	349.119	43.962	2.29625	1.81179	2.08908e-05	117685	168276	153845	172755	126442	122183	244170	258202	241072	252333	246119	318395	171786	178032
Lipids	Pos_01164	Positive	(M+H)+	1-Aminocyclohexanecarboxylic acid	144.101	263.43	2.05362	0.443834	1.06945e-05	155854	158280	155892	166354	183194	162103	45304.3	46983	60544.2	103990	80594.8	98286.1	190461	148193
Lipids	Pos_03868	Positive	M+	2-Methylbutyroylcarnitine	246.17	231.595	1.93825	0.264261	9.32883e-11	101819	98320.2	97799.3	107110	109286	109062	23061.6	25067.1	24104.1	34678.2	28523.8	29304.8	91612.1	76418.2
Lipids	Pos_11071	Positive	(M+H)+	Taurocholic acid	516.298	237.208	1.65912	3.24395	1.06286e-10	26399.1	21958.8	23546.7	26378	26024.9	25521.5	77554.4	86168.2	77681.9	81626.4	87015.2	75991.8	79856.4	43336.8
Lipids	Neg_12021	Negative	(M-H)-	Fludrocortisone acetate	421.208	81.335	1.56581	2.45263	0.000207891	40004.1	36726.6	38437.9	39611.5	39658.8	39200	83696	144181	85214.3	85559.5	95283	79096	53233.9	52629.4
Nucleotides	Neg_00528	Negative	(M-H)-	Uracil	111.019	85.9925	7.59134	0.200939	1.61139e-13	1.37152e+06	1.45869e+06	1.47213e+06	1.45055e+06	1.51803e+06	1.49155e+06	262327	296521	272288	313448	295581	320561	948162	987788
Nucleotides	Neg_00851	Negative	(M-H)-	Thymine	125.033	74.263	4.69634	0.272645	5.79071e-13	607317	602481	598386	610709	655570	612124	150134	157794	174172	173873	167529	181628	402002	276879
Nucleotides	Neg_06475	Negative	(M-H)-	Inosine	267.08	102.969	2.93393	2.57095	0.000901726	116283	113472	118946	198204	120106	133770	186615	426740	443982	283972	288195	429266	353317	178670
Nucleotides	Neg_06067	Negative	(M-H)-	3-Methyluridine	257.077	42.332	2.55082	3.09202	9.09819e-11	61358.9	55928.7	60732.9	74577.1	56799.4	71099.6	199493	199998	185545	209282	186780	195404	150875	68550.9
Nucleotides	Pos_04812	Positive	(M+H)+	3'-O-methyladenosine	282.119	104.737	2.53393	0.248944	4.43079e-10	189025	154673	166071	175653	175669	188471	38792.9	41458.1	40987.5	48185.8	45672.6	46185.4	180078	123509
Nucleotides	Neg_07057	Negative	(M-H)-	2'-O-methylinosine	281.094	102.52	2.3063	1.6684	0.0273259	121151	338235	112222	319774	326312	319633	503980	500605	501650	469227	393733	195685	403579	393767
Nucleotides	Neg_07137	Negative	(M-H)-	Xanthosine	283.074	41.444	2.07226	1.77801	0.00475967	109862	93663.8	269388	170858	100072	137528	265200	317416	299427	229596	235071	220378	187347	212894
Nucleotides	Neg_07550	Negative	(M+CH3COO)-	7-Methylguanosine	293.148	90.79	1.8186	2.52972	5.54664e-08	40316.3	53749.9	35121.7	51985.5	30831.1	56541.5	118241	117022	106732	108318	114009	115026	72865.9	77462.6
Nucleotides	Neg_07966	Negative	(M+CH3COO)-	Pseudouridine	303.079	102.384	1.77609	2.13402	0.00478153	78461.9	74618	50022.6	84933.1	83470.8	78297.5	125561	227237	131432	84321.6	172852	218485	104979	105182
Nucleotides	Pos_03777	Positive	(M+H)+	Thymidine	243.097	97.9105	1.75954	0.558867	8.12252e-07	146870	129258	137124	146214	164725	160067	76538.6	82175.4	74260.1	83943.9	85602.3	91661.9	170316	116731
Nucleotides	Pos_05245	Positive	M+	3'-O-methylguanosine	297.102	52.279	1.49426	2.86589	4.77314e-08	21644.5	26148	24939.8	21302.1	25292.8	29856.5	74604	67649.7	78378.4	75837.7	58643.2	72430.5	33625.1	44081.8
Nucleotides	Pos_00477	Positive	(M+H)+	Cytosine	112.049	233.701	1.47282	0.33602	3.79365e-07	67061.3	66811.5	63820.5	71299.2	75555.8	64699.9	15890.3	16429.4	18189.6	38183.6	23398.5	25424.1	66100.7	66542.2
Nucleotides	Pos_03797	Positive	(M+H)+	Cytidine	244.093	233.261	1.1546	0.473543	1.98347e-05	51618.7	53111.8	51057.8	71363.3	57990.8	47384.3	27152.5	27587.1	26274.2	32568.2	20197.2	23686.4	56543.6	50149
Nucleotides	Pos_04861	Positive	(M+H)+	Guanosine	284.099	254.801	1.08647	0.31041	1.56947e-05	31713.4	35413.5	35305.2	39502.7	45027.5	35301.4	6695.11	8036.26	6867.52	24024.9	9907.7	13461.5	29846.4	31010.3
Nucleotides	Pos_05271	Positive	(M+H)+	1-methylguanosine	298.115	108.863	1.07955	2.22018	2.75897e-08	21522.8	18409.3	18322	19984.8	16348.1	23449.2	42018.6	45878	39395.5	44913.7	47196.7	42659.1	33711.1	25281
Organic acids	Neg_00978	Negative	(M-H)-	Ketoleucine	129.054	47.132	16.6922	0.118456	1.04895e-14	6.51701e+06	6.54681e+06	6.53522e+06	6.14264e+06	6.35868e+06	6.35849e+06	795010	566770	959732	775903	733664	724586	4.23293e+06	4.2086e+06
Organic acids	Neg_05998	Negative	(M-H)-	Palmitic acid	255.227	44.4815	6.93421	0.727672	0.00832844	5.73165e+06	6.21992e+06	5.70732e+06	4.1787e+06	3.96487e+06	4.36241e+06	3.35338e+06	3.54663e+06	3.67003e+06	4.10132e+06	3.27769e+06	4.00107e+06	3.27951e+06	3.09961e+06
Organic acids	Neg_04698	Negative	(M-H)-	Myristic acid	227.197	44.773	5.81537	0.358358	3.73717e-05	1.37723e+06	1.38993e+06	1.42787e+06	981581	801388	1.10862e+06	499850	409800	337334	390917	406657	494986	885871	722129
Organic acids	Neg_00403	Negative	(M-H)-	Valeric acid	101.06	100.575	5.55974	0.21573	1.94804e-06	992794	669023	727816	1.08077e+06	828785	751131	187200	160107	139493	231096	205616	165995	644338	640469
Organic acids	Neg_03505	Negative	(M-H)-	Dodecanoic acid	199.166	46.0855	4.92084	0.21674	8.93379e-09	740191	661241	691882	588397	563730	587946	154019	125818	125121	137749	134998	153142	451328	427534
Organic acids	Neg_01410	Negative	(M-H)-	Caprylic acid	143.105	48.104	4.1482	0.574884	1.61803e-05	868208	847523	903520	930960	885286	913127	422232	512795	742728	465536	466149	465401	486131	488165
Organic acids	Neg_02001	Negative	(M-H)-	3-Hydorxy-3-methylglutaric acid	161.042	277.894	3.66544	2.95609	0.000269604	237846	99606.2	132033	154952	127425	200600	491984	576063	511875	224305	563754	447581	307574	244626
Organic acids	Pos_02817	Positive	(2M+H)+	(R)-3-Hydroxybutyric acid	209.102	261.151	3.07424	2.12305	8.69647e-10	170344	150566	152930	184488	194872	180506	346134	371761	364747	362789	383838	365345	282642	217520
Organic acids	Neg_00187	Negative	(M-H)-	Isobutyric acid	87.0443	109.06	2.82101	0.22471	7.88146e-11	206741	226649	218104	201656	213070	187009	47214.6	43669.9	46214.4	48866.8	43671.8	51975.6	130422	125733
Organic acids	Neg_01322	Negative	(M-H2O-H)-	2-Oxoadipic acid	141.016	88.8365	2.30781	0.401272	2.52722e-07	185770	198943	206390	146854	196745	180345	66296.7	76683.9	86579.8	72779.8	70367.8	74730.1	106193	179086
Organic acids	Neg_01031	Negative	(M-H)-	2-Ethyl-2-Hydroxybutyric acid	131.069	131.071	2.25816	0.453358	4.66127e-06	211593	208654	210482	192192	193556	186448	111306	69097.8	113955	55486.7	73333.4	122177	163770	142156
Organic acids	Pos_00665	Positive	(M+NH4)+	DL-a-Hydroxybutyric acid	122.081	282.416	2.09617	2.01566	0.00264677	99814.8	105999	103230	117546	134572	116080	365186	221091	197940	185370	217691	177809	216007	162643
Organic acids	Pos_03556	Positive	(2M+H)+	5-Aminopentanoic acid	235.169	126.129	1.88945	2.68094	0.0117814	40539.9	63775.3	63732	56333	70000.5	74902.5	143456	157007	269311	255519	79475	85257.1	101409	148570
Organic acids	Neg_00425	Negative	(M-H)-	2-hydroxy-butanoic acid	103.039	229.427	1.83283	0.593033	1.02325e-09	166872	167900	172321	172811	169080	163286	93206	91664.3	101960	102935	99942.2	110602	144187	131008
Organic acids	Neg_08600	Negative	(2M-H)-	Pimelic acid	319.145	44.15	1.79934	1.75377	0.00011621	98609.3	114236	91443.9	71972	92869.6	121106	173831	154501	193710	167280	140577	205243	124182	139731
Organic acids	Neg_02367	Negative	(M-H)-	Capric acid	171.135	44.7935	1.7512	1.27561	5.85755e-06	240846	238660	236655	234917	251200	235532	306733	334726	317228	290757	293700	290935	238005	231128
Organic acids	Pos_06096	Positive	(M+NH4)+	Phytanic acid	330.337	49.72	1.6819	0.390261	5.9364e-05	76944.8	105118	113058	116790	86520.4	123411	50057.3	23852	36602.7	33222	34037	64909.9	39039.5	68023
Organic acids	Neg_01544	Negative	(2M-H)-	Propionic acid	147.064	216.906	1.64003	0.870143	3.42147e-05	468669	457122	474816	457983	462035	447648	383974	396378	415231	376800	415666	420742	438277	410272
Organic acids	Pos_05390	Positive	(M+NH4)+	Stearic acid	302.305	49.766	1.63911	0.511197	0.0291602	90887	119176	169439	262748	153751	256735	99418.9	53624.2	89944.2	60500.9	66024.7	168642	63894.1	142895
Organic acids	Pos_02438	Positive	(M+NH4)+	2-Isopropylmalic acid	194.103	87.2585	1.62244	1.4952	0.00132143	136967	110692	125767	132587	127105	149393	151368	222822	204093	202011	232310	157409	170124	154760
Organic acids	Pos_05063	Positive	(M+NH4)+	16-hydroxy hexadecanoic acid	290.268	104.82	1.61627	0.585508	5.12419e-05	117830	142441	140797	157009	156343	120772	89339.2	84090.1	81716.9	69620.6	65241.8	99003	73088.2	111855
Organic acids	Neg_04221	Negative	(M+CH3COO)-	Succinylacetone	217.066	41.577	1.56874	3.01502	0.00178989	27313.6	24178.6	32693.7	35395.9	37686.5	26716.1	99727.2	117917	104024	111837	99766.8	21444.8	31344.3	30389.4
Organic acids	Pos_05979	Positive	(M+Na)+	Eicosapentaenoic acid	325.221	46.739	1.37534	1.93817	0.00028838	35983.4	52939.3	55213.8	40326.4	37509.6	60719.2	97615.9	65860.2	100307	76617.6	112305	95198.8	81151.6	70238.7
Organic acids	Neg_00672	Negative	(M-H)-	Succinate	117.018	369.558	1.36101	0.491871	1.42332e-05	69356.8	81748.7	82328.8	84747.6	85256.2	70056.5	31321.9	35001.4	33887	58257.5	32454.7	41975.6	57489.5	74347.1
Organic acids	Pos_06814	Positive	(M+NH4)+	Behenic acid	358.368	49.3355	1.33347	0.4221	0.000130013	42357.6	71683.1	69606.2	71880	75056.1	86263.3	42204.8	23131.6	26812.4	25601.7	23885.1	34315.3	34317.8	54718.1
Organic acids	Pos_00891	Positive	(M+H)+	Aminocaproic acid	132.101	373.015	1.2736	3.13909	8.09995e-09	15497.6	13275.2	14143.6	16964.3	16045.2	17408.1	47877.1	54157.1	50895.9	48165	50717.3	41171.3	30109.1	24520.3
Organic acids	Neg_00970	Negative	(M-H)-	Citraconic acid	129.017	82.034	1.18497	1.63614	2.83951e-05	54648	44883.3	43278.4	46578.8	52169.5	52166	79360.5	93333.9	74349	84387.4	65585.1	83557.7	43327.7	53690.6
Organic acids	Neg_02433	Negative	(M-H)-	Suberic acid	173.078	342.576	1.17811	0.31762	1.3259e-07	37939.5	46311.8	43728.6	43580.6	44848.7	36520.3	10476.2	9541.82	12531.2	19397	12482	15907.2	29204.7	33936.1
Organic acids	Neg_03833	Negative	(M-H2O-H)-	Prephenate	207.025	104.285	1.13898	1.47791	3.77077e-06	58555	53574.8	58334.4	55940.1	53373.7	69378.9	88137.5	82877.4	87156.7	88015.3	78450.7	91384.4	67144.3	74424.1
Organic acids	Neg_00089	Negative	(M-H)-	Glycolate	75.0085	272.586	1.11405	0.520312	6.48628e-07	50815.7	54311.3	55733.3	52015.3	61077.6	50318.2	23687.5	25028.5	25723.4	33333.2	28022.8	32926.8	44995.3	37834.9
Organic acids	Neg_00622	Negative	(M-H)-	Maleic acid	115.002	57.6785	1.07071	0.741348	8.00632e-05	93406.3	99368.9	99070.9	105785	100680	96143	74127	67264.5	67371.2	88589.6	65193.6	78151.2	77925	79829.5
Organic acids	Neg_02972	Negative	(M-H)-	Azelaic acid	187.093	329.324	1.00382	0.326719	2.87295e-08	28393.1	32239.8	30692.8	30068	33957.4	29281.7	8385.74	7252.19	9328.87	14744.7	9608.79	11002.8	20693.4	22793.8
Others	Pos_00530	Positive	(M+H)+	epsilon-Caprolactam	114.091	46.966	13.4804	3.15379	2.17915e-09	1.35836e+06	1.52625e+06	1.63489e+06	1.90282e+06	1.96837e+06	2.02558e+06	5.9068e+06	5.11252e+06	5.64425e+06	5.70471e+06	4.94058e+06	5.54186e+06	2.19551e+06	3.15822e+06
Others	Neg_00208	Negative	(M-H)-	Dihydroxyacetone	89.0246	224.5	8.99777	0.432179	5.52425e-08	2.94079e+06	3.08398e+06	3.01948e+06	2.90255e+06	2.94259e+06	2.80971e+06	986068	1.04126e+06	1.16733e+06	1.65396e+06	1.25545e+06	1.54512e+06	2.41862e+06	2.17248e+06
Others	Pos_03577	Positive	M+	Procaine	236.15	362.469	8.15732	0.392942	7.02614e-06	2.21994e+06	2.41208e+06	2.22911e+06	2.50548e+06	2.59716e+06	2.15043e+06	610919	611019	756595	1.58741e+06	897882	1.08224e+06	2.42868e+06	2.2175e+06
Others	Neg_01121	Negative	(M-H)-	Adenine	134.046	156.33	7.78873	0.205031	7.49717e-12	1.57697e+06	1.52692e+06	1.54964e+06	1.52606e+06	1.62479e+06	1.48868e+06	253843	246806	274797	403038	327878	399005	1.07127e+06	1.06193e+06
Others	Pos_00680	Positive	(M+H)+	Nicotinamide	123.054	58.98	7.42959	0.207939	4.18449e-08	1.27906e+06	1.41449e+06	1.32394e+06	1.43493e+06	1.5197e+06	1.64836e+06	373874	129403	376395	391187	123481	398201	253220	1.07365e+06
Others	Pos_01043	Positive	(M+H)+	Urocanic acid	139.05	275.905	6.69254	0.551645	0.000676665	2.17001e+06	2.17922e+06	2.28688e+06	2.54174e+06	2.64979e+06	2.49866e+06	829010	803320	1.15567e+06	2.03723e+06	1.30032e+06	1.77749e+06	3.07402e+06	2.48687e+06
Others	Neg_14620	Negative	(M-H)-	3-Acetyl-11-keto-.beta.-boswellic acid	511.332	155.5	5.39499	0.125464	8.00074e-14	715567	678212	683064	669974	671231	635814	80373	82600.6	86352	87081.6	88476.2	83731.6	418180	413805
Others	Pos_00998	Positive	(M+H)+	Hypoxanthine	137.045	163.827	4.34787	0.485921	3.92951e-06	776431	778447	794650	779534	816214	763163	278924	302518	321995	559111	367383	457996	840195	703294
Others	Pos_01312	Positive	(M+H)+	Triethanolamine	150.112	154.439	4.31115	1.97156	5.16253e-07	442256	367864	379542	389971	409409	412956	714162	827164	757368	773197	931922	731878	698981	519590
Others	Pos_03950	Positive	(M+Na)+	Metyrapone	249.096	95.718	3.80508	4.87349	1.85468e-05	90936.4	73651.5	66268.3	88720.2	82223.2	91276.8	412704	536046	368695	472520	236473	376566	147932	268123
Others	Pos_06868	Positive	(M+K)+	.alpha.-Linolenoyl ethanolamide	360.242	43.059	3.64592	0.280146	0.0410142	1.00185e+06	1.10291e+06	1.09847e+06	382582	160587	104720	137152	117942	278803	146912	129306	268759	559203	520294
Others	Neg_01645	Negative	(M-H)-	Xanthine	151.024	209.506	3.49228	0.254554	3.92069e-08	305076	365300	343911	340202	373323	293352	60641	63512.3	75825	129192	80379.4	104946	229159	254277
Others	Pos_00007	Positive	(M+H)+	Urea	61.0385	101.471	3.05593	1.82818	2.26741e-07	202411	201763	211525	260551	274657	269196	452160	429372	425746	409243	453970	425709	362635	320957
Others	Pos_00406	Positive	(M+H)+	Diethanolamine	106.085	298.709	2.9916	5.67643	1.0324e-09	35318.9	27852.6	49759	46534	30137.8	44733.7	204369	223334	223197	206890	256046	216356	125410	99384.3
Others	Pos_02129	Positive	(M+H)+	Dacarbazine	183.101	120.764	2.91853	2.04451	0.0115808	275571	243041	187838	272820	168272	258358	604719	674591	638317	390751	197459	368537	472523	238034
Others	Pos_00626	Positive	(M+H-H2O)+	Tyramine	120.08	249.284	2.78127	0.414643	1.13324e-06	255553	279702	261701	282915	322099	262764	86130.8	89648.3	99450	163241	118930	132871	281061	237247
Others	Pos_01687	Positive	(M+H-H2O)+	4-Pyridoxic acid	166.052	362.672	2.77567	16.0505	2.45697e-09	4319.39	8652.75	33082.9	4092.56	6264.13	6475.56	179758	187575	169941	147422	174161	150518	78892.4	56854
Others	Neg_10467	Negative	(M-H)-	Glafenine	371.081	91.0835	2.63663	2.91687	1.13375e-07	119463	55158	73689.2	70757.9	67231	64593.9	213533	209789	211186	207552	241855	231284	145417	172757
Others	Neg_00782	Negative	(M-H)-	Nicotinate	122.023	211.819	2.49574	0.49172	5.5555e-13	251285	250959	247838	248981	250742	241519	116147	117330	122269	126785	120131	130651	192255	191890
Others	Neg_07637	Negative	(M+CH3COO)-	Carbamazepine	295.11	44.0945	2.47784	2.0757	0.000172898	129816	129771	131531	139551	125635	127122	235623	261268	390173	239955	244995	254146	184889	182051
Others	Neg_09760	Negative	(M-H)-	.beta.-Estradiol 3-sulfate	351.134	44.052	2.46345	2.14427	5.41874e-08	109457	108890	115442	107153	106153	110401	204512	240393	257730	213363	249743	244110	151816	195623
Others	Pos_06165	Positive	(M+H)+	21-hydroxypregnenolone	333.243	34.542	2.33939	3.30548	0.0468738	23795.8	181750	178256	46303.4	27974.1	46045.7	428240	22187.7	389889	385405	30049.4	410604	53527.7	262796
Others	Neg_06054	Negative	(2M-H)-	Cyanuric acid	257.026	85.134	2.32834	1.80553	1.33684e-05	154358	144903	147491	132765	155405	143295	237210	215107	298313	287971	299250	247794	171247	242140
Others	Pos_01304	Positive	(M+H)+	N6-Methyladenine	150.076	124.447	2.28841	0.414856	6.44289e-06	207637	200369	154237	226736	160937	217744	65477.6	100296	69843.2	81657.4	86537	80600.1	171921	123796
Others	Pos_05024	Positive	(M+Na)+	Cyclizine	289.164	39.277	2.28012	3.15438	1.76099e-06	56632.7	27580.1	27025.9	52818.4	64220.7	78986.8	171891	178471	160137	163863	167670	127197	67196	88583.5
Others	Neg_08659	Negative	(2M-H)-	S-Allyl-L-cysteine	321.089	102.441	2.24544	2.64449	0.0169821	64808.4	103527	68704.9	104900	108894	103956	101698	349497	377062	143852	138639	356388	98411.1	286098
Others	Neg_09164	Negative	(M-H)-	Cyclopiazonic Acid	335.139	42.4645	2.233	1.68561	0.000559859	197487	162337	206461	170555	153928	140171	250122	359832	340662	280936	282522	223687	213557	210669
Others	Pos_01599	Positive	(M+H)+	L-Carnitine	162.112	343.3	2.23062	0.151293	1.35508e-07	98134.6	137753	114634	124487	145207	108025	13617.2	12157.7	15467.5	15058.3	31510	22367.2	102726	89932.2
Others	Neg_09324	Negative	(2M-H)-	Propylthiouracil	339.098	101.709	2.19611	1.71121	0.0224442	87718	222487	218865	239009	215688	313497	397681	396960	131847	398900	451127	443370	343147	336487
Others	Pos_01732	Positive	(M+H)+	Pyridoxal (Vitamin B6)	168.065	94.1805	2.19278	3.57751	1.07723e-08	35144.1	42059.5	30551.1	35811.9	50566.2	36599.1	149837	140736	139003	120856	150562	124451	69510.8	52136.6
Others	Pos_00589	Positive	(M+H)+	N-Methyl-.alpha.-aminoisobutyric acid	118.086	291.3	2.06444	0.679638	0.00467995	328341	337995	328089	366518	399136	340229	215829	151892	228133	333442	187689	310464	427690	346744
Others	Pos_03954	Positive	(M+NH4)+	isocarboxazid	249.132	37.07	2.0424	3.06384	0.0317543	105150	34215.2	25370.9	26621.3	43055.1	158416	45007.4	45712.7	259549	271557	301416	280322	33579.9	17256.4
Others	Neg_02663	Negative	(M-H)-	Protionamide	179.067	102.814	2.01325	1.57653	0.000902913	169593	164965	165820	184380	174386	178766	230875	227928	218723	310683	331225	316861	186337	262942
Others	Neg_07864	Negative	(M+CH3COO)-	Tetrahydrobiopterin	300.135	27.283	2.0065	0.305038	6.25589e-06	131186	115977	167813	117903	116509	103116	17767.6	40906.8	42330.5	42819.1	39230.2	46488.1	92652.2	89448.4
Others	Neg_13053	Negative	(M-H)-	Astemizole	457.242	101.656	1.98498	2.42551	0.000564804	66274.4	64085	85563.9	65383	52471.7	64698.9	191222	69924.5	172674	182082	183477	167130	79069.4	124577
Others	Pos_00043	Positive	(M+H-2H2O)+	2-Amino-2-methyl-1,3-propanediol	70.0642	201.639	1.98061	0.160363	1.63013e-09	90917.2	95601.8	92343.2	96178.3	103566	93713.4	8972.72	7875.38	10687	30540.7	15947.9	17755.4	81995	69881.6
Others	Neg_10655	Negative	(2M-H)-	3-Indolepropionic acid	377.148	44.793	1.91617	1.73537	1.2833e-06	104682	100521	117428	98031.8	91631.4	122690	193506	161280	169769	192486	192931	191963	119568	144416
Others	Pos_00263	Positive	(M+H)+	2(1H)-Pyridinone	96.0431	48.49	1.87807	2.27666	0.000287948	49008.1	63265.8	60513.3	72784.8	68788.1	77269.2	212141	114334	116195	145849	163133	139956	64701.8	94762
Others	Neg_10857	Negative	(M+CH3COO)-	p-Hydroxyphenylbutazone	383.161	83.66	1.87797	0.419704	3.694e-10	125013	116310	127250	127026	131818	117637	51130.9	52984.3	55455.9	51550.2	56874.9	44705.8	84059.2	86365.1
Others	Pos_01076	Positive	(M+H-2H2O)+	N-Carboxyethyl-.gamma.-aminobutyric acid	140.069	77.379	1.81712	3.34628	0.000439598	40147.9	33501.3	18637.7	37134.1	34313.6	37651.6	102199	89173.1	88265	184767	114069	95421.3	49829.1	118465
Others	Pos_04844	Positive	(M+NH4)+	Thiamine	283.153	147.024	1.81603	2.27095	0.00245969	69594.4	60528.3	63650.3	70082.9	65772.9	75735.4	183160	90386.5	82735.3	191208	193725	179348	118346	105195
Others	Neg_01472	Negative	(M-H)-	Monomethyl glutaric acid	145.048	201.593	1.80211	0.37964	5.65424e-11	109727	111679	110910	100075	100185	108618	37708.9	42475.5	41669.8	40471	39353	41745.2	72074.6	65083.8
Others	Pos_03344	Positive	(M+NH4)+	Altretamine	228.195	37.19	1.75633	1.51477	0.033221	237185	277482	239727	136573	182764	111558	331511	150664	324715	282268	352206	354081	294970	331886
Others	Pos_08150	Positive	(M+NH4)+	RU-0211	408.253	260.197	1.73522	1.96708	6.28341e-08	62761.1	57908.8	62009.3	69590	67207.8	67535.3	118869	132565	119189	128006	143467	119190	98265.9	83978.4
Others	Pos_07567	Positive	(M+NH4)+	Perindopril	386.275	45.811	1.73468	1.69678	6.56917e-07	82924	86808.3	83337.6	100674	96474.4	99379.8	167255	143779	154412	165286	139474	162340	115352	124786
Others	Neg_08366	Negative	(M-H2O-H)-	Tosyllysine Chloromethyl Ketone	313.084	304.984	1.70268	1.9132	1.3129e-05	38694.9	69769.3	75479.3	77358.8	67958.7	86589.6	140346	133859	145504	121413	136562	117923	92080.4	92623.9
Others	Pos_01947	Positive	(M+H-H2O)+	Hippuric acid, methyl ester	176.069	42.462	1.69038	3.48163	0.00521775	50195.5	44425.9	48079.4	17530.4	13269.4	11110.8	139602	64426.2	135276	137085	139692	26666.6	31475	75145.3
Others	Neg_02183	Negative	(M-H)-	Zoxazolamine	166.998	115.214	1.65992	1.65622	0.000262649	102808	92219.6	96070.1	97348.8	97521.7	100073	138924	153789	142445	196972	198424	140059	124155	154884
Others	Pos_05892	Positive	(M+H-H2O)+	(+-)5,6-DHET	321.242	44.562	1.65521	1.81264	0.00138214	64149.3	67701.4	113421	121079	76644.7	61435.8	187710	169505	151459	105351	156460	143868	83226.9	128280
Others	Neg_06946	Negative	(M+CH3COO)-	Dicamba	278.983	40.6345	1.63399	2.26581	6.99525e-05	54162.5	51848.6	54986.7	60257.5	2143.54	57722.4	105986	111193	102026	109781	104017	103964	80189.3	8903.19
Others	Neg_01232	Negative	(M-H)-	4-Nitrophenol	138.017	88.575	1.5892	1.52636	3.67335e-07	108507	95499.8	104516	96628	91339.4	104743	167202	152466	158492	143680	145058	150798	123589	126443
Others	Neg_02714	Negative	(M-H2O-H)-	Aklomide	180.985	120.96	1.53931	1.85834	0.00528252	76714.9	77467.7	75578.9	78089	73150.7	72774.7	104406	185021	90979.5	175813	104710	182340	156618	101448
Others	Pos_01190	Positive	(M+H)+	N-Acetylcadaverine	145.132	304.822	1.52343	3.53349	7.1317e-09	19403.2	16575.6	16328.1	20551.6	19071.2	20742.6	67095.2	68633.3	68656.4	63103.3	74675.8	55962	43441.2	32801.3
Others	Neg_09538	Negative	(M-H2O-H)-	Phenethicillin	345.088	103.495	1.51899	1.69085	8.10414e-07	72729.7	66495.5	67896.1	74049.7	71421.6	71298.6	118657	126081	98324	124463	126415	122795	105226	102398
Others	Pos_00276	Positive	(M+H-H2O)+	.beta.-Cyano-L-alanine	97.0381	52.965	1.51048	0.42131	1.57738e-05	59525.5	82808.1	86795.2	94116.2	87696.8	102285	37484	29564.3	34196.8	45983.5	30453	38546	45431.2	77821
Others	Neg_02230	Negative	M-	Uric acid	168.03	147.436	1.44928	0.27878	1.84978e-13	57261.2	59268.5	62092.7	59206.1	58595.6	57911.6	15249.8	15230.9	16398.4	16712.1	16931.1	18259.4	41046.5	43753.9
Others	Pos_04288	Positive	(M+NH4)+	Molsidomine	261.148	376.616	1.44354	1.84399	3.74888e-05	55780.9	55140.5	38037.8	67103.9	67082.7	46827.5	88889.1	96673.2	94327.4	110935	119872	97771	75666.4	77714.4
Others	Neg_07899	Negative	(M+CH3COO)-	Fenoprofen	301.114	184.861	1.43015	1.97145	1.04184e-06	48494	29166.4	52528.5	43970.9	55848.5	37670.6	88442.9	87573.1	90369.6	84207.1	89531.5	87589.9	74074.7	71692.8
Others	Pos_05460	Positive	(M+H)+	1,3-Dipropyl-8-cyclopentylxanthine [DPCPX]	305.194	33.36	1.39876	1.76125	0.000209133	53033.9	53968.8	40941.5	65213.2	57647.9	88050.3	92512.6	94466.2	103629	119976	103146	118306	97275.2	69052.6
Others	Neg_01021	Negative	(M+CH3COO)-	Pyruvaldehyde	131.033	207.088	1.35558	0.414111	7.03867e-09	68353.7	68329.1	68427.9	60087.3	61232	61218	23794.2	22210.6	26662.3	29129.6	28220.6	30511.9	48568.4	40655.6
Others	Pos_00206	Positive	(M+H)+	N,N'-Dimethylurea	89.0695	52.279	1.34968	1.40004	0.016954	124365	118939	126442	147411	157064	157648	146175	227665	152902	164443	228723	244737	163407	172916
Others	Neg_06670	Negative	(M-H2O-H)-	Procaterol	271.147	103.284	1.32302	0.573996	0.012327	112504	74763.4	112236	110248	115014	197104	62014.1	74123	60891.6	79602	71209	66510.5	73392.7	83534.9
Others	Pos_00726	Positive	(M+NH4)+	Nitrosobenzene	125.069	52.214	1.31642	1.7467	0.0101987	51033.4	61422.6	65165.6	72813.7	79331.2	73214.5	122845	48249	154968	145217	111079	121530	92352.2	104306
Others	Pos_04795	Positive	M+	Xanomeline	281.159	245.71	1.31018	1.93744	3.2879e-07	38271.4	33249.2	35990.2	42491	39920.3	39560.7	67237.7	85248.2	73753.7	73202.7	77333.8	67832.9	58017.8	51336.3
Others	Pos_05993	Positive	(M+H)+	norpropoxyphene	326.217	244.918	1.29258	1.74245	1.02628e-07	48336.5	40801.2	44002.8	48059.8	49400.6	49466.4	78276	81927.8	81069.1	81781.3	90427	74523.5	92537.9	70321.7
Others	Pos_03370	Positive	(M+H)+	Nabumetone	229.126	211.077	1.2655	3.02392	1.0769e-06	20554.4	1001.7	17888.6	20786.9	19310.8	20737.9	50348.3	48636.5	50186.2	51721.5	53029.3	49317.5	34090.1	28430.3
Others	Pos_00927	Positive	(M+H)+	Oxindole	134.059	226.464	1.24845	2.60074	4.1598e-10	19788.6	17365	18178.4	21638.4	21019.7	21169.2	49638.6	54839.8	51925	48677.1	55119.6	49702.1	37386.1	29726.5
Others	Neg_11666	Negative	(M-H)-	alpha-Mangostin	409.175	87.7715	1.24767	1.34146	0.0297605	154588	138390	142347	148663	154587	144080	154476	178733	221808	283222	183661	162145	137635	150291
Others	Pos_01767	Positive	(M+NH4)+	N-Methylanthranilic Acid	169.096	294.358	1.21583	2.49752	3.8976e-07	20223.6	18556.5	18592.9	21215.1	22252.9	23099.2	41568.3	49012.9	55765.8	51223.5	59923.2	52049.9	37322.6	29083.4
Others	Pos_04131	Positive	M+	Diphenhydramine	255.159	143.678	1.2157	1.41595	0.00285739	120796	75021.9	72292.4	86039.6	122881	79232.1	125906	143405	124982	128720	135559	129066	127700	93579.8
Others	Pos_00772	Positive	(M+H)+	Melamine	127.072	174.917	1.20641	3.10518	4.26071e-08	11137.4	11284.8	14246.4	16162.1	21300	12075.4	41747.6	48729.2	45911.2	39971.1	45535.8	45791.1	30665.2	20235.2
Others	Pos_06441	Positive	M+	Oxyphencyclimine	344.217	426.548	1.19989	2.22699	1.58399e-08	21731.2	22227.1	22716.9	27177.9	25122.2	26047.3	54586.7	56245.5	55285.4	55614.1	55189.1	46043	35709.3	33279.6
Others	Pos_02103	Positive	(M+NH4)+	Phenylpyruvate	182.08	258.576	1.1871	2.51471	4.03041e-11	18401.4	16882.9	18008.9	19970.6	18916.4	21277.2	46181	49188.6	49187.4	47077.4	48717.5	44960.3	36837.8	26950.1
Others	Neg_05977	Negative	(M+CH3COO)-	Homoveratric acid	255.085	247.55	1.17784	1.715	1.22832e-05	47747.2	31870.3	44860.9	41193.5	44886.7	42785.8	75300.1	68324.7	81666.9	78988.7	62149.8	68054.4	58521.4	48447.8
Others	Neg_02170	Negative	M-	1-Methylxanthine	166.047	33.188	1.17182	1.76392	2.25494e-06	46076.2	40673.4	39023.9	31356.6	31143.5	40218.1	65171.3	60434.1	71627.6	65277.4	67748.4	72781.7	57324.8	55518.3
Others	Pos_10669	Positive	(M+H)+	Fexofenadine	502.302	241.93	1.1255	2.20736	2.62441e-08	21523	18526.9	20189.1	25062.1	23099	21637.3	41556	49354.9	47280.1	51612.5	49806.9	47428.8	38902.6	29084.5
Others	Neg_16874	Negative	(2M-H)-	Nordihydroguaiaretic Acid	603.284	44.887	1.12469	1.48503	1.96172e-06	56759.3	45213.6	57575.5	56910.2	64575.8	53383.1	83109.6	79910.3	80875.4	83479.1	86870.2	82374.4	66281.7	78728.5
Others	Pos_01989	Positive	(M+NH4)+	Pargyline	177.138	93.709	1.12443	4.82557	0.0249501	9437.24	8829.2	5911.11	4670.79	18388.5	15772.8	26873.4	92986.8	26597.6	103335	28992.5	25271.9	7065.03	19631.6
Others	Neg_00653	Negative	(M-H)-	Indole	116.049	169.417	1.11655	0.584306	1.47505e-08	63434	58910	62985.1	58806.6	60233.1	67635.8	35120.6	35770.7	38093.4	33716.4	36162.4	38501	51991.6	41472.2
Others	Pos_01199	Positive	(M+H)+	Oxyquinoline	146.059	87.094	1.11607	1.86782	5.29619e-07	37157.6	25628.9	27429.3	31128.9	27649.7	31649.1	62792.4	51488.5	56564.8	57085.7	53281.9	56195.4	28598.6	42285.3
Others	Neg_04990	Negative	(M-H2O-H)-	Cimetidine	233.098	138.53	1.08858	0.620626	0.000643465	77520.4	73527.6	75969.3	72421.3	77487.6	80047.5	52379.7	49935.9	55404.8	51527.2	55777.1	18584.9	52767.1	56639.4
Others	Neg_00853	Negative	(M-H)-	5-Amino-4-carbamoylimidazole (AICA)	125.044	131.125	1.07546	2.93738	7.88878e-07	13771.2	12530.3	11771.3	12465.3	12056.7	12798.7	42293.5	44608.3	36060.7	30793.1	35469.8	32234.3	22423.8	23143.2
Others	Pos_05885	Positive	(M+H)+	Enoxacin	321.132	280.042	1.04867	7.12396	1.42105e-07	2791.17	3896.98	2086.44	3781.02	4737	5092.04	20493.7	28090.6	31967.7	23658.6	29602	25654.8	12499	9733.09
Others	Pos_06373	Positive	(M+K)+	Glycerol 1-myristate	341.218	379.936	1.03426	2.16349	8.08033e-10	19009.6	17579	17513.8	19410.1	20224.9	18999.4	39643.4	43659.3	41700	41661.9	39905.1	37336	26467.9	24189
Others	Pos_03082	Positive	(M+H)+	N-Acetylserotonin	219.122	259.205	1.01267	2.17869	0.00157642	10267.2	17724.7	50403.1	13907.5	20744.2	18469.6	48675.5	51701.1	47905.6	47220.8	48445.7	42584.9	29008.3	22851.1
Secondary metabolites	Pos_00588	Positive	(M+H)+	Betaine	118.086	263.988	7.67268	0.470667	2.34173e-05	2.38313e+06	2.30468e+06	2.22956e+06	2.41392e+06	2.70092e+06	2.5483e+06	798405	784581	943407	1.75288e+06	1.11846e+06	1.46482e+06	2.92734e+06	2.46519e+06
Secondary metabolites	Neg_05350	Negative	(M+CH3COO)-	3,4-Dihydroxyhydrocinnamic acid	241.077	98.916	6.27467	0.226008	5.35799e-11	1.03174e+06	1.02199e+06	1.01726e+06	1.02636e+06	1.07468e+06	1.02742e+06	249775	220921	115820	283610	236804	294193	650443	659934
Secondary metabolites	Neg_00762	Negative	(M-H)-	Benzoic acid	121.028	274.259	3.92627	0.407104	8.96792e-08	498580	559616	532977	569484	569799	497372	168495	182822	200697	293488	216867	251693	429202	474950
Secondary metabolites	Neg_04056	Negative	(M+CH3COO)-	3,4-Dihydroxybenzoate (Protocatechuic acid)	213.036	86.357	3.40636	1.47731	1.9375e-07	514214	497785	491360	500745	520090	524322	727466	673249	799599	760707	756002	786587	294142	676927
Secondary metabolites	Neg_01150	Negative	(M-H)-	2-Methylbenzoic acid	135.042	104.281	2.82275	1.76567	2.37632e-12	212010	204985	208648	214741	206550	219864	380371	371077	383005	359819	372039	370442	317473	322267
Secondary metabolites	Neg_02100	Negative	(M-H)-	Formylanthranilic acid	164.031	96.7735	2.78258	0.347088	1.44786e-07	265384	243318	272133	221380	274363	205546	69359.2	86892.7	84587.1	86206.6	102807	84574.9	181556	171723
Secondary metabolites	Neg_05342	Negative	(M+CH3COO)-	Hydroxyphenyllactic acid	241.066	45.7745	2.37717	1.54578	3.90592e-08	228252	216687	196766	216078	219135	210418	327267	350401	316963	352945	315582	326773	268183	243296
Secondary metabolites	Pos_01004	Positive	(M+H)+	Phenylacetic acid	137.062	36.4105	2.29534	3.23943	0.0442703	159857	33697.6	30126.1	186430	37050.2	35022.3	383447	387301	369279	3404.65	62416.3	356149	265708	47198.8
Secondary metabolites	Neg_12496	Negative	(M-H2O-H)-	Vindoline	437.213	134.887	2.1487	0.341317	5.53725e-07	177339	130710	173526	134122	138575	135306	49621.3	49043.6	54059.7	50062.5	48363.8	52477.6	82323	85688.8
Secondary metabolites	Neg_09616	Negative	(M-H)-	Camptothecin	347.104	87.695	2.13237	2.05032	2.73464e-07	87358.7	88788.3	89488.7	94314.2	93184.6	91548.4	200950	159925	174226	177895	212350	191430	186613	130741
Secondary metabolites	Neg_03136	Negative	(M-H)-	Isoscopoletin	191.031	44.073	2.11415	1.94963	0.00102943	101365	107271	107386	170063	103513	109857	290126	195690	201947	300667	184432	190815	139524	139952
Secondary metabolites	Neg_08054	Negative	(M+CH3COO)-	Ellipticine	305.131	44.073	2.01167	1.88008	6.23032e-05	102444	89642.8	118500	136449	82725.9	86235	214765	197957	166058	196451	224508	158386	151048	120122
Secondary metabolites	Pos_01986	Positive	(M+Na)+	Terpineol	177.13	36.284	1.96759	1.8778	2.03161e-05	64423.7	88964.7	90975.1	110836	114670	116447	190911	199318	196166	183152	146078	185361	133009	139189
Secondary metabolites	Neg_01181	Negative	(M-H)-	Anthranilic acid (Vitamin L1)	136.038	100.924	1.89411	0.35239	1.59862e-06	101649	130483	137190	116620	107157	111653	35705.5	36670.7	43227	26840.6	41735.9	64167.9	84223.5	85787.9
Secondary metabolites	Neg_09102	Negative	(M-H2O-H)-	Ajmalicine	333.16	102.784	1.88465	0.691789	0.0158273	393644	164099	377515	382493	384101	378262	222354	246624	232772	243294	242886	251070	199833	208295
Secondary metabolites	Neg_05803	Negative	(2M-H)-	Hydroxyhydroquinone	251.05	100.534	1.71187	1.3283	0.0439864	311949	298775	303068	314183	313041	263787	367107	473860	484628	215459	472663	383607	387091	397241
Secondary metabolites	Pos_06920	Positive	M+	Fastigilin B	362.166	377.171	1.66885	10.1053	1.17783e-11	5920.46	5442.67	5786.44	6206.47	7878.38	6065.46	62611.1	69155.8	62315.8	62658.4	63599.6	56584.6	42742	6711.69
Secondary metabolites	Pos_06891	Positive	(2M+H)+	Coniferol	361.165	37.918	1.64147	1.70889	5.14598e-06	61344.5	72586.9	87873.4	81324.2	90478.5	99127.9	129830	136680	137166	144676	155926	137751	130050	93210.9
Secondary metabolites	Pos_01154	Positive	(M+NH4)+	1,2,3-Benzenetriol	144.064	269.886	1.46207	4.4837	0.000660175	14534.4	14126	13816.8	16403.7	16134	14753.3	63216.3	66347.9	71483.1	95562.6	19797.8	86086.2	20759.9	19733.6
Secondary metabolites	Pos_02248	Positive	(M+Na)+	4-Isopropylbenzoic acid	187.078	243.265	1.4338	8.80004	0.000739905	6971	5988.31	6636.31	6883.05	5530.6	6134.03	4545.67	68707	61364.6	66481.6	70249.6	64314	12576.2	8029.54
Secondary metabolites	Neg_09841	Negative	(M-H)-	Xanthohumol	353.148	127.035	1.39673	1.79062	4.79108e-12	50774.7	48893.2	49669.8	50176.3	48056.2	52775.2	91553.1	87965.5	92071.8	89751.1	89699.6	86762.4	59833.9	66913.1
Secondary metabolites	Neg_02200	Negative	(M+CH3COO)-	p-Cresol	167.067	104.392	1.30933	1.35688	2.79089e-07	109233	103546	99724.6	98385.4	94325.7	94919	130177	133775	135966	132261	140459	141669	103115	118141
Secondary metabolites	Neg_06066	Negative	(M+CH3COO)-	Vanillylmandelic acid	257.071	87.61	1.24015	1.59011	3.4921e-07	65112.5	51771.7	49776.7	51290.4	59261.4	50573.2	91181.2	83843.6	85139.9	87013.5	88330.1	85708.2	73340.6	77557.3
Secondary metabolites	Pos_04180	Positive	(M+H-H2O)+	Fisetinidol	257.081	224.413	1.17572	2.18659	3.06139e-10	22353.4	21464.3	22321.5	25117.7	24817.9	26523.6	48603.5	52799.4	54236.4	51734.3	53410.9	51020	40522	30761.3
Secondary metabolites	Neg_02271	Negative	(M+CH3COO)-	1,4-Dihydroxybenzene	169.047	102.711	1.16475	1.54868	3.90407e-08	51053.1	46447.1	48804.1	51406.6	50033.7	58642.7	76545	77084.7	81574.3	78860.8	81399.6	79030.5	69013.8	75044.1
Secondary metabolites	Neg_04406	Negative	(M+CH3COO)-	Umbelliferone	221.04	156.323	1.15141	1.47197	6.31019e-07	60816.9	58500	60848	55954.1	58039.9	59291.7	87254.6	83904.5	90889.4	77040.2	94011.5	87168.7	79538.9	76407
Secondary metabolites	Neg_02187	Negative	(M-H)-	3-Hydroxymandelic acid	167.031	212.841	1.143	2.05924	0.00542604	29511.6	25121.5	25956.1	65157.2	25227.2	28307.6	66363.4	105304	61854.1	53486.3	64349.4	59011.3	41837.2	36573.2
Secondary metabolites	Pos_00457	Positive	(M+H)+	4-Aminophenol	110.058	110.403	1.0953	2.69651	2.27977e-05	19792.9	10134	10780.3	13923	15365.1	22868.4	34438.6	38292.2	52205.5	48881.3	38845.6	37744.6	24882.1	18121.4
Secondary metabolites	Pos_05244	Positive	(M+Na)+	Phloretin	297.076	195.078	1.06489	2.10751	1.6808e-07	20638.5	18116.4	20612.5	23442.2	21920.6	23661.3	50259.2	50218.3	42024.8	42574	41553.4	43957.1	41040.7	31446.4
Secondary metabolites	Pos_01879	Positive	(M+NH4)+	Arecoline	173.128	78.851	1.05652	1.6149	0.0101487	54728.9	45484.4	55423.1	32854.3	62415.2	67100.2	90119.2	77860.5	82968.1	112412	48596.3	101591	70936.1	77709.1
Secondary metabolites	Pos_01384	Positive	(M+H)+	3-Aminosalicylic acid	154.049	336.829	1.01484	2.36368	1.45752e-09	15213.7	13960.1	13581.8	16061.5	15859.1	17957.8	35913.8	39124.1	37429.7	36155.8	36949.5	33384.3	26558.8	21012.8
Sugar acids	Neg_09899	Negative	(2M-H)-	2-Dehydro-3-deoxy-D-gluconate	355.088	42.578	5.36299	4.65475	3.05173e-12	157314	170416	128593	200979	145139	156630	779151	731670	775918	732006	710139	735350	452393	433992
Sugar acids	Neg_07961	Negative	(M+CH3COO)-	2-Deoxy-D-glucose 6-phosphate	303.043	43.114	1.89053	1.92704	0.00577722	103747	104709	108930	109593	103656	101280	248615	245679	230619	260580	104193	128039	105535	106875
Sugar acids	Neg_05262	Negative	(M-H2O-H)-	3-Deoxy-2-keto-6-phosphogluconic acid	239.099	47.132	1.69535	1.90469	1.25424e-06	72903.4	59504.6	57746.3	67753	70147.9	74944.6	120643	150367	122151	135013	123363	116055	74985.8	90242.1
Sugar acids	Neg_04052	Negative	(M-H)-	2-Deoxyribose 5-phosphate	213.017	31.692	1.48084	1.68311	0.0121393	81207.4	82696.1	78981.1	142422	146794	36441	159862	136956	198414	193760	135581	132346	167871	106207
Sugar acids	Neg_07377	Negative	(M+CH3COO)-	D-Ribose 5-phosphate	289.029	43.268	1.16398	1.68027	1.98409e-08	39938.5	39260.4	42779.3	41856.1	40832.2	42547.2	68857.8	73330.4	68190.9	72393.9	61961.4	70650.2	54088.4	51532.6
Sugars	Neg_08735	Negative	(M-H2O-H)-	D-Lactose	323.104	43.2775	2.23523	1.65598	0.000625481	205728	182800	185607	151884	190554	181356	280882	419886	276847	283700	273231	283600	297223	200879
Sugars	Neg_00232	Negative	M-	Glycerol	92.0494	96.459	2.00942	0.444337	1.43921e-07	141216	146569	165281	153197	149656	149864	71762.7	63681.5	41096.5	72360.5	78994.2	74576.5	103048	103368
Sugars	Pos_02126	Positive	(M+H)+	D-Sorbitol	183.086	377.171	1.25978	0.34723	6.58107e-05	46828.6	52188.6	49299.5	57763	71196.8	46589.6	10909.3	13080.8	15602	36426.4	15623.5	20814.1	54404.8	52254
Sugars	Pos_03601	Positive	(M+H-2H2O)+	Arbutin	237.082	28.7	1.20989	2.03511	0.000439548	32565.9	30899.3	26118.8	34576.2	55086.3	23812.6	44676.4	72328.3	70677.5	70980.4	80881.5	73703.1	59845.1	45423.7
Sugars	Pos_01320	Positive	(M+H)+	L-Arabinose	151.06	103.115	1.14456	2.29243	0.00156289	27438.4	23199	22671.5	24938.8	26721.6	29027.5	66948.3	64500.7	68356.5	65807.2	20687.7	66726.5	38770.1	23569.6
Sugars	Pos_03138	Positive	(M+K)+	D-Mannitol	221.044	256.273	1.0218	2.94619	5.00791e-05	18557.1	8168.86	16077.1	8913.13	9700	10492.9	33652.4	26938.1	32271.7	31622.5	39797.1	47575.8	18832.1	14844.7
Sugars	Neg_02735	Negative	(M-H)-	L-Iditol	181.068	292.009	2.57271	0.157524	1.50128e-09	153560	168069	166081	164218	172805	137777	18114.9	17445.9	21935.9	42881.6	22355.1	28885.4	98892.8	134134
	Neg_02003	Negative	(M-H2O-H)-	D-Fructose	161.042	69.4085	0.999309	1.4811	0.0757546	99598.4	96324.7	95609	98225.9	30552.1	39660.5	105850	176388	106915	84423.4	97569.5	110115	139710	71053.2
	Neg_06822	Negative	(2M-H)-	4-Hydroxybenzoate	275.05	43.287	0.996679	0.78043	0.397598	476716	56428.1	109619	470127	478316	471233	162671	288534	294699	285571	285854	292261	210781	472589
	Pos_02686	Positive	(M+H)+	Ile-Ala	203.139	229.251	0.991986	0.560664	0.000202254	56751.1	47473.8	47678.8	51806.1	58226.3	46816	31332.9	22689.7	23034.6	44458.4	23740.5	27850.1	55715.7	43773.6
	Pos_01206	Positive	(M+H)+	4-Guanidinobutyric acid	146.091	353.894	0.989353	0.418172	0.00275781	21263.5	55420.9	51269.3	36618.4	42722.2	52828.9	10076	20238.3	17395.5	32794.9	20406.4	7865.28	37408.5	44737.9
	Pos_03171	Positive	(M+NH4)+	Gly-Glu	222.117	47.485	0.988876	1.70531	0.0013256	44158.5	38986.6	33491	29423.9	25528.6	35806.8	59236.9	43152.4	60456	71145.4	47706.7	71977	59943.2	53509.4
	Pos_05270	Positive	(M+H)+	S-Methyl-5'-thioadenosine	298.096	92.7385	0.987296	1.86465	0.0054718	30079.4	39772.6	39489.6	25547.5	22252.5	26620.5	36094.6	45643.7	72459.4	69470.9	44598.1	74384.9	58412	49724.7
	Neg_00626	Negative	(M-H)-	Levulinic acid	115.038	204.9	0.981576	0.583271	8.2316e-10	46686.8	49547.8	49072.2	45798.4	47195.8	45497.4	24854.7	27329.2	28481.4	28079	28354	28433	38727.2	36939.7
	Neg_07385	Negative	(M-H)-	Rosolic Acid	289.094	25.864	0.980776	1.3736	0.00143901	46178.5	70516.7	51604.6	76956.1	70738.6	74726.8	92672.9	94097.1	88096.4	82167.3	92643.9	87015.3	54145.3	108000
	Neg_07544	Negative	(2M-H)-	O-Acetyl-L-serine	293.094	101.754	0.979108	1.2313	0.239049	236696	207553	206883	234495	214334	247965	146734	403479	328987	309816	164775	305916	380936	316974
	Pos_02673	Positive	M+	Indole-3-pyruvic acid	203.054	94.864	0.976702	1.81696	0.0643818	70184.5	8881.35	74392.7	12625.6	78464.5	17885.5	71875.4	113526	66456.2	91820.7	41079.6	92074.9	109508	138714
	Pos_01429	Positive	(M+H)+	L-Histidine	156.076	380.346	0.975838	0.57255	0.0239949	41079.4	81969.3	76606.1	63681.5	90004.6	56896.9	32258.7	17007.2	37988.6	74617.4	46445.1	26564.6	50299.7	58939.1
	Neg_00704	Negative	(M-H)-	L-Threonine	118.049	345.916	0.974702	0.269603	4.39328e-07	22856.6	24709.8	27854.6	30767.6	30536.7	26154.2	5250.12	5144.15	6020.88	12549.6	6836.11	8112	20915.3	24134.9
	Neg_07103	Negative	(M+CH3COO)-	Bufexamac	282.134	131.84	0.971238	1.61145	6.25841e-08	32598.4	33134.9	30073.3	31833.9	32506.5	32086	51339.6	57787.5	48762	50053.8	49818.2	52011.9	48937.2	42823
	Pos_02044	Positive	M+	1,7-Dimethylxanthine	180.065	212.419	0.970767	2.10157	3.78782e-11	18365.6	16542.5	15437.4	18298.5	17846.3	17899.1	35826.5	36570.3	36423.9	37607.3	37835.4	35118.5	28444	22899.4
	Neg_01930	Negative	(M-H2O-H)-	D-Glucono-1,5-lactone	159.026	268.036	0.97022	1.34337	0.0139907	102041	58548.8	91794.1	61820.5	73337.4	90823.2	108212	132409	108349	97928.5	91937.7	103787	70408.2	75167.4
	Pos_02250	Positive	(M+H)+	Pro-Ala	187.107	332.705	0.966038	0.569322	0.000148201	42138.7	47997.1	45644.2	58056.8	56799	44189.7	23018.9	24918.9	24089.5	38186	27367.8	30269.6	60856	47752
	Pos_02291	Positive	M+	L-NG-Monomethylarginine	188.127	250.873	0.963839	2.01151	0.0331748	22346.8	16097.5	81060	24585.6	11744.5	25812.8	55396.3	50136.7	59760.7	57413.5	48981	93695.8	37020.1	29613.9
	Pos_00073	Positive	(M+H)+	Methylguanidine	74.07	252.511	0.963262	1.96873	3.78131e-05	21090.5	19617.7	19871	22259.4	22481.3	22369.6	36044.5	44209.7	35694	35824.8	52342.2	47270.7	32513.3	27726.6
	Pos_04287	Positive	(2M+H)+	(+-)-Mevalonolactone	261.13	67.975	0.962281	1.30451	0.0378179	110942	93007.1	88598.9	109807	101151	100918	90252	97166	154251	140451	160972	145385	88606	106543
	Neg_15607	Negative	(M-H)-	Manumycin A	549.251	227.888	0.961477	3.33607	5.40323e-11	8764.76	7610.23	8258.14	7743.99	7272.33	8625.96	25822.1	26112.3	27349.3	29310.7	27248.1	25207.6	15376.9	16653
	Neg_03902	Negative	(M-H)-	5-Hydroxyferulate	209.041	103.264	0.95961	1.2609	0.000440376	89218.1	74238.9	93155.9	82479.4	74803.9	82600	94299.1	107445	101243	101034	114504	107505	97173.4	93174.2
	Pos_01624	Positive	(M+H)+	Nicotine	163.122	77.9445	0.956315	0.79572	0.226842	179956	131226	167479	259742	316149	349201	183173	198579	173005	155904	224415	181918	184352	131780
	Neg_02988	Negative	(M-H)-	3-Hydroxycapric acid	187.129	47.203	0.955985	0.653015	0.0186831	74193.3	77347.2	110119	68018.4	68808.9	83216.7	44868.4	49116.5	40656.1	90056.3	44382	45480.3	81340.9	88500.6
	Pos_02534	Positive	(M+H-H2O)+	Kinetin	198.087	296.757	0.952025	1.60944	9.9763e-07	27172.4	31049.4	29609.3	33766	38286.5	29861.7	49547.9	54243.7	51456.7	48985.7	52475.7	48674.5	35593.5	30091.4
	Neg_06107	Negative	(M-H)-	D-Glucosamine 6-phosphate	258.037	25.052	0.949905	1.7109	0.0013242	18896	36008	35552.5	25032.5	38520.2	35892.4	44700.4	66187.9	63591.7	47504.6	58340.9	44576.1	36516.6	62621.8
	Pos_04453	Positive	(M+H)+	Adenosine	268.104	170.629	0.947596	2.77605	5.49051e-07	11047.5	9570.02	10484.9	11232.1	10698.8	10715.6	23791.7	34524.6	25694.1	29376.7	32214.5	31368.7	21165.5	16144.7
	Neg_12726	Negative	(2M-H)-	N-Acetyl-L-tyrosine	445.172	44.7735	0.947169	1.60202	0.0270431	48651.4	48059.2	71785.8	50933.8	6929.9	55248.4	81491.4	64281.1	73893.3	60342.1	67229.6	103906	99416.5	48886.4
	Neg_17348	Negative	(M-H)-	Leukotriene C4	624.286	55.802	0.946556	0.229573	1.18316e-12	24998.2	24098.5	22132.2	23065.6	24213.9	23203.5	5397.02	5243.6	5800.35	5550.76	5153.91	5387.61	12243	10854.7
	Pos_03497	Positive	(M+H)+	Ile-Thr	233.149	231.578	0.940399	0.535876	2.03167e-06	40186.8	39853.5	38385.4	40275.8	44594.5	38424.4	19015.4	20637.8	20643.1	29108.8	17306.2	22821	47520.6	37744.9
	Neg_10864	Negative	(M-H)-	Ethynodiol diacetate	383.23	45.601	0.940362	2.06944	0.0914929	61964	33127.7	27469.6	24252.6	24831.5	28130.1	112164	105629	24007.7	32088.4	29229.2	110305	26523.1	19473
	Pos_03304	Positive	(M+H-H2O)+	D-Biotin	227.091	206.517	0.939086	2.21282	0.000261854	17288.8	15213.7	15808.4	18587.5	17194.2	17157.7	41333.1	32699.3	54005.7	33745.4	32365.8	29899.4	30967	31710.7
	Pos_00845	Positive	(M+H)+	.beta.-Homoproline	130.085	49.725	0.934954	1.25957	0.0436252	92223.3	118632	122305	121668	138049	127408	201812	157470	124054	157134	121207	145572	67759.9	111665
	Neg_07066	Negative	(M-H)-	AG-17	281.167	102.945	0.928992	1.204	0.00113071	104738	105995	101018	103517	109457	101139	135827	121283	131567	128631	131109	105123	161790	168593
	Neg_01679	Negative	(M-H)-	3-Hydroxyanthranilic acid	152.032	90.99	0.927338	1.53266	0.00554394	53430.5	41850.8	38499.7	44141	44490	38964	55904.2	80829.9	81210.8	78518.7	46534.4	57602.9	75001.4	67057.5
	Pos_01790	Positive	(M+H)+	Pyridoxine	170.08	108.959	0.923903	1.37164	0.0113505	81868	57561.1	55854.2	64825.8	60471.5	70308	68018.5	105709	77714.5	85936	111487	87291.7	115967	57486.2
	Neg_06068	Negative	(M-H)-	Acadesine (Drug)	257.087	27.8745	0.92054	0.679917	0.392845	284489	272283	282524	170129	3210.54	283384	304672	11983.7	225197	10316.3	318012	11005.9	355394	139556
	Pos_11129	Positive	(M+Na)+	1-Palmitoyl-sn-glycero-3-phosphocholine	518.319	191.106	0.920217	0.679068	3.12086e-07	50639.6	55665.6	53162.3	54717.9	55257.7	61130	38583.6	37739.9	37619.1	35915.7	36369.7	38253.4	52475	48345.6
	Neg_01498	Negative	(M-H)-	L-Glutamate	146.043	381.501	0.919854	0.322472	6.94007e-05	18786.4	23359.3	24153.4	32780.6	36326.3	31248.9	6431.03	7141.54	7779.1	12934.9	9981.86	9473.07	20572.6	26703.7
	Neg_00648	Negative	(M-H)-	Acetylglycine	116.033	287.916	0.916928	0.258557	2.13972e-06	22414.8	24595.3	22238.8	21164.1	22487.1	32057.2	3269.24	5926.18	6898.4	9303.49	4849	7233.36	17225.9	16844.1
	Neg_01606	Negative	(M-H)-	Thymol	149.094	149.032	0.914243	1.52409	0.0847626	53623.8	51216.6	53830.2	47360.7	49662.8	106098	64887.1	123878	119581	56437	123794	62826.5	133910	59857.9
	Neg_02886	Negative	(M+CH3COO)-	4-Hydroxy-6-methylpyran-2-one	185.041	200.972	0.911968	1.74579	3.1288e-06	25925.4	21100.2	21880.6	20978.5	22131	30267.3	44642.9	42168	43091.1	39642	42255	36596.6	42091.1	26448.9
	Pos_05199	Positive	(M+Na)+	16-Hydroxypalmitic acid	295.227	47.0895	0.911271	0.720047	0.250435	144853	154924	152864	169812	169263	172620	229711	53088	56649.4	232979	59061.6	62878.2	116345	135877
	Pos_03775	Positive	(M+H)+	Lumichrome	243.087	48.49	0.909223	1.4651	0.115072	72076.5	99764.1	49030	62309.9	116848	59194.2	47094.4	114456	162435	137201	75446.5	136173	61949.5	67285.4
	Pos_02347	Positive	M+	3-(2-(Methylamino)ethyl)-1H-indol-5-ol	190.107	289.281	0.908772	1.99746	1.36449e-08	17048.2	15250.1	15180.8	16850.2	21355.4	17276.6	35110.6	33200.8	35018.4	34637.2	32442	35252	24369.9	19851.7
	Pos_01670	Positive	(M+H)+	L-Fucose	165.076	114.999	0.907675	1.97823	0.00025047	11906.8	10491.7	21733	24089.2	25120.1	25778.9	37647.4	42936.1	34527	33985.9	39025.5	47524.8	25190.3	17704.9
	Pos_02321	Positive	(M+H)+	Val-Ala	189.123	253.248	0.899122	0.591469	0.00053463	48769.1	43956.3	44361	46886.4	52472.2	45400	16241.9	25601.6	22729.4	39945.9	25794.7	36389.2	60120.4	44830.5
	Pos_04381	Positive	(M+Na)+	Equol	265.082	36.202	0.896768	3.69924	0.174194	14276	8107.52	11139.7	18465.6	15185.3	20507	187645	38741.2	18786.1	21732.1	33889.1	23560	142184	147352
	Neg_04028	Negative	(M+CH3COO)-	Dopamine	212.095	114.37	0.888803	1.52049	0.0375462	50110.7	49261.8	52116.5	52548.3	50989.4	52533.7	58771.6	74960.2	56723.9	130994	76352	69840.6	129010	68446.1
	Neg_15896	Negative	(M-H)-	Protoporphyrin IX	561.25	257.719	0.884055	2.36062	3.81833e-11	13004.1	10637.2	11074.6	12324.8	10910.2	12049.5	28107.5	27746.9	27152.4	26174.6	28781	27282	19385.1	18277.3
	Neg_00917	Negative	(M-H2O-H)-	Adipic acid	127.038	107.99	0.883231	0.896238	1.8667e-05	164160	165620	171864	167387	161398	163220	145014	143648	146809	150713	154968	149393	172654	188478
	Pos_03496	Positive	(M+K)+	7,8-Dihydro-.alpha.-ionone	233.127	211.096	0.883046	2.29601	0.000289662	12276.1	13582.6	14004.1	15037.8	14839.3	15174.6	28114.9	39902.3	18311.7	36502.7	39194.7	32938.2	13447.9	21710.7
	Pos_01587	Positive	(M+H-H2O)+	Hippuric acid	162.054	200.523	0.873779	3.16072	6.86401e-11	7475.78	6324.73	6388.19	8294.05	7305.44	7449.46	24507.4	22999.1	21126.1	23226.4	22461.1	22342.2	15532.2	11878.8
	Neg_00682	Negative	(M-H)-	3-Hydroxyisovaleric acid	117.054	199.143	0.873173	0.450036	1.4184e-08	29779.7	28716.5	29486.2	26764.6	28308.1	28182.7	12444.3	11891.8	9374.96	14223.4	14053.3	15075.4	24916.3	24571.4
	Neg_00249	Negative	(M-H)-	Phenol	93.0334	159.954	0.871118	0.562183	0.00126166	42771.1	43486.2	46767.3	40971.6	44122.8	43277.3	27129.8	29114.2	30804	27667	28730.2	3507.44	32430.8	36316.4
	Pos_02779	Positive	(M+NH4)+	1H-Indole-3-propanoic acid	207.112	301.986	0.870466	2.08309	8.18139e-08	15289.7	12844.3	13126.1	15722.1	15645.5	14481.8	27683.7	32880.2	27830.2	29629	33623.4	29810.2	25100.1	18261.8
	Pos_01133	Positive	(M+Na)+	Purine	143.033	154.286	0.869842	4.05965	6.26595e-10	4730.73	5915.15	4638.1	7275.95	4446.28	3292.15	19573.2	21428.3	20846.4	19068.9	21145	20938.9	10836.1	9502.37
	Neg_08666	Negative	(M+CH3COO)-	D-Sorbitol 6-phosphate	321.16	44.861	0.867824	1.31228	0.0956576	169023	74181.5	75981.8	87999.1	84758.4	70017.4	118845	119378	135919	136004	113033	114274	107834	113795
	Neg_13499	Negative	(M-H)-	Sildenafil	473.201	35.457	0.867249	0.656091	0.0730915	113260	113406	121228	67187	38325	63473.7	51056.8	72375.6	51390.1	40539.9	68096.9	55661	59487.5	56169.9
	Pos_01278	Positive	(M+H)+	Dihydroxyfumarate	149.079	213.837	0.866635	1.54945	8.24874e-07	33207.6	28557.9	27857.6	28497.5	27198.6	26880.5	39378.7	44875.5	44603.5	44299.1	46203.2	47455.5	39384.8	34777.4
	Neg_03761	Negative	(M+CH3COO)-	Dimethylbenzimidazole	205.103	204.384	0.865822	1.73366	0.000108962	27111.2	20254.4	27639.1	18471.7	17996.5	26080.7	41919.6	42315.7	42662.2	38121	43169.6	30282.4	26378	30551.6
	Pos_00976	Positive	(M+H)+	2-Phenylacetamide	136.075	43.2915	0.863442	1.68225	0.00925746	28245.2	50725.4	21489.5	30607.5	23276.1	30053.3	42673.9	46795.7	54476.4	38129.8	71991.9	56134.1	24367.6	33825.5
	Pos_01506	Positive	(M+H)+	4,6-Dioxoheptanoic acid	159.065	33.4205	0.851848	0.831699	0.521778	682500	760709	704603	365373	140722	145706	316437	346923	406882	410818	437133	410241	441256	507604
	Pos_00878	Positive	(M+H)+	N-Acetylputrescine	131.117	157.487	0.851676	2.81811	5.33971e-10	8597.33	7619.44	6998.33	8400.38	8750.83	8498.09	22408.6	22504.5	22728.4	23945.3	25117.5	21000.9	13066.3	11935.3
	Neg_02394	Negative	(M-H)-	Acetyl-DL-Leucine	172.102	102.36	0.85157	0.755929	0.00943985	69217.5	70578.5	95402.5	83757.6	102660	77616.8	63100.2	75035.9	60235.4	61959.8	65539.9	51513.8	84995.3	59046.6
	Neg_01536	Negative	(M-H)-	p-Hydroxycinnamaldehyde	147.042	117.762	0.849787	0.572572	0.0832625	46824.6	57719.1	101268	47078.1	104766	21938.3	43906.9	22593.2	41263.6	43803.9	24551.7	41225.3	45117.9	47840.1
	Pos_00933	Positive	(M+NH4)+	Methyl acetoacetate	134.08	110.371	0.849732	1.88103	2.18778e-08	17071.3	14169.4	14766.9	17406.8	18973.3	19322.7	32332.8	32226.1	30632.3	31189.1	33330.5	31609.6	26017.3	19283
	Pos_03024	Positive	(M+H)+	Val-Val	217.154	208.779	0.847977	0.390039	9.91139e-07	25458.4	24775	23269.1	26790.8	28282.6	20206.6	7799.69	8600.33	8541.29	13538.8	9046.61	10504.3	25566.4	19923.4
	Pos_00540	Positive	(M+H)+	3-Cyano-L-alanine	115.052	115.365	0.844999	3.86378	0.0160762	6379.34	7920.42	7959.51	7403	6667.88	8457.67	14492.1	14790.7	49044.5	54307.3	16477.8	23938	7950.84	11992
	Pos_04338	Positive	(M+H)+	Phe-Pro	263.139	230.19	0.840159	0.701895	4.45731e-06	48746.7	50588.8	47656.6	52061.2	53913.7	50415.5	33753.5	32481.3	32909.2	41256	38157.8	34384.8	58630.3	45984.5
	Neg_02070	Negative	(M-H)-	trans-2-Hydroxycinnamic acid	163.038	44.0005	0.834148	0.818121	0.181697	188022	188109	190011	191766	186289	151079	160739	175757	38737.1	173860	176309	170665	207854	180421
	Pos_01532	Positive	(M+K)+	1-Phenylethylamine	160.05	42.635	0.830859	1.46946	3.50976e-05	28878.6	30285.4	28426.1	32848.4	39554.2	37843.9	49221.1	51552.1	49687.4	47682.6	43907	48663.5	73478.4	39290
	Pos_01282	Positive	(M+NH4)+	Nname,cis-4-Hydroxy-D-proline	149.095	110.48	0.827544	1.95626	4.33696e-05	13917.6	15113.8	13936.1	19561.3	15532.6	17509.7	27758.5	40674.6	27724.9	28523.2	32134.3	30145.6	22079.3	32674.3
	Neg_07179	Negative	(M-H)-	Probenecid	284.09	44.795	0.822242	1.34526	0.000908317	52416.9	48876.8	50647.9	56526	35789.5	39436.5	64088	68779	61538.5	64869.4	59472.6	62893.7	59052.6	50080.5
	Pos_09853	Positive	(M+NH4)+	Verapamil	472.327	134.375	0.820848	1.69418	4.24005e-05	18316.8	22117.8	20170.7	22717.8	22683.1	24881.8	44049.7	37703.3	36960.7	36824.1	28728.5	37481	17306.4	29235.8
	Pos_03847	Positive	(M+H)+	Leu-Leu	245.185	185.394	0.817855	0.371356	1.64558e-08	22482.9	19922.8	20914.9	20897.3	24133.3	22834.9	7372.11	7121.09	6769.86	10148.4	7815.41	9489.9	20667.6	17310.3
	Neg_10536	Negative	(2M-H)-	Indoleacrylic acid	373.117	130.037	0.81778	0.835203	0.304949	206822	195041	195634	342327	340473	198278	204658	169457	180488	182537	315785	181985	216547	488335
	Pos_04181	Positive	(M+H)+	Pinocembrin	257.082	39.742	0.817391	2.58111	1.92125e-05	8103.19	9021.64	7234.69	10661.1	9882.26	10775	24583.2	26493.7	30054.4	20853.2	16989.4	24736.9	18836.1	15041.7
	Pos_02556	Positive	(M+K)+	Tolazoline	199.062	238.098	0.81518	2.49697	1.15762e-08	7873.32	8324.63	9784.1	9467.01	9988.55	9510.4	23760.8	24769.7	21398.9	20107.1	24312.7	22854.6	15080.7	13666
	Pos_02883	Positive	(M+NH4)+	Pectin (Galacturonic acid)	212.074	267.465	0.813871	2.57781	2.58503e-08	8142.85	7894.04	8028.27	9435.69	8877.47	9590.46	23429.7	22788.6	22239.4	19156.9	25136.6	21214.3	15713.8	11605.9
	Pos_02737	Positive	(M+H)+	L-Tryptophan	205.096	250.22	0.809416	1.59453	1.71213e-05	20082.6	20982.4	24660.3	22486.3	32238.6	26113.6	40161.2	41045.7	37668	38162.5	38789.8	37872.7	31936.3	30224
	Pos_02649	Positive	(M+Na)+	Mexiletine	202.125	305.289	0.808079	3.66617	4.6743e-07	2443.9	6233.34	6123.2	6926.42	6579.4	2582.66	17858.2	21530.5	19178.3	18011.1	20847.3	15818.6	14380	8617.56
	Pos_05973	Positive	(M+K)+	N1,N12-Diacetylspermine	325.2	124.474	0.807837	0.804236	0.0807461	94316.8	119870	132802	182652	107856	138482	108124	86931.9	110143	108742	107297	102831	108300	132509
	Neg_09466	Negative	(2M-H)-	Sulfanilamide	343.05	109.861	0.807425	1.22116	4.00825e-09	61054.7	59598.4	57752.8	61689.5	61136.9	61794	73880.1	74413.4	74291.8	72324	74109.4	74295.7	68164.3	56868.1
	Neg_10186	Negative	(M-H)-	10-Hydroxycamtothecin	363.097	199.939	0.802598	1.17017	0.00437939	114859	104599	104605	89935.3	86073.7	93754.2	116052	115846	113315	113501	121380	114780	124450	93827.7
	Pos_06644	Positive	(M+H)+	Lomefloxacin	352.143	361.366	0.802487	2.01613	2.69435e-07	11570	11081.4	11498.9	14752.5	15833.7	14933.1	25962.9	28181	27824.6	27700.5	27344.3	23611.3	19975.1	16034
	Neg_00442	Negative	(M-H)-	Glyceric acid	105.018	304.494	0.797171	0.539602	3.02321e-05	23220.6	30289.7	33363.8	32769.5	35206.9	26275.5	14986.5	14827.6	16987.4	16485.4	16618.3	17830.8	26014	22863.6
	Neg_02342	Negative	(M-H)-	3-Dehydroshikimic acid	171.026	344.822	0.796794	1.69977	1.33747e-06	19463.3	14528.8	18576.9	21040.2	18076.3	23212.6	31005.2	33312.4	34730.6	32408.6	31511.1	32332.9	21116.4	19543.6
	Neg_07974	Negative	(2M-H)-	N1-Methyl-2-pyridone-5-carboxamide	303.11	255.915	0.790237	1.69277	1.20023e-06	21595.9	15052.2	18922	19283.7	16785.9	22143.7	33638.9	33313.9	32632.2	29412.6	31799.6	31811.9	25297.8	23197
	Pos_05255	Positive	(2M+H)+	Anethole	297.19	49.201	0.78338	1.30289	0.0129028	45867.3	57992.8	68562.4	51223	79866.7	65668.4	76856.9	77817.4	78295.8	93303.8	68209.7	86519.3	62025	80044.9
	Pos_03104	Positive	(M+K)+	Pyridostigmine cation	220.067	381.904	0.782848	5.57591	0.00125987	2929.85	3487.54	3395.02	3800.7	3443.76	2709.77	20258.3	23764.6	22508.5	21313.2	20772.6	1599.82	14297.4	4321.47
	Pos_04501	Positive	(M+NH4)+	Deoxyinosine	270.124	49.015	0.781653	1.69066	0.0060842	24377.1	38025.5	31892.2	16021.1	13749.9	20050.7	33523.5	31946.5	44606.8	49972.7	44344.3	39258.5	43484.8	47032
	Pos_03655	Positive	(M+H)+	Tyr-Gly	239.104	294.509	0.773367	1.72171	0.00586752	19566.6	17862.1	22483.1	19705.8	38295.8	19252.9	34369.4	40169.8	35744.7	34861.1	56475.5	34540	33116.2	21184.4
	Pos_02960	Positive	(M+H)+	Sulfacetamide	215.048	297.9	0.77077	2.04003	0.0301085	8531.32	8263.31	26620.3	28121	10359.7	28753.6	16677.9	50247.2	48851.3	44672	18985.2	46294.2	14423.3	12240.3
	Pos_05461	Positive	(M+NH4)+	Etodolac	305.203	223.552	0.768879	2.25298	9.89701e-07	5409.13	9348.05	10737	10577.1	11829.5	12190.1	21802.8	24276.8	22036.6	20744.4	24680.1	21842.9	18811	1790.23
	Pos_01769	Positive	(M+NH4)+	DL-.alpha.-Phenylglycine	169.097	122.989	0.764329	1.58656	0.00583522	14100.7	23290.7	25673.3	22847.6	35756.2	43725.4	41704.2	48344.8	42739.3	37476.6	48744.8	43398.1	35441.7	28977
	Neg_01542	Negative	(M-H)-	Mevalonic acid	147.063	252.14	0.764251	0.685527	4.31226e-08	40228.5	39734	40318.9	37282.6	37500.9	36159.1	25686.8	25795.7	27145	26450.4	25479.9	27952.6	36416.7	32117.5
	Neg_04967	Negative	(M-H)-	Riluzole	233.003	268.176	0.753134	1.79512	4.66119e-06	14911.3	13547.5	18901.9	14485.7	12777.5	16734.1	28286.8	26997.6	31784.1	24870.9	26349.9	25709.3	19290.3	16369.8
	Pos_05254	Positive	(M+Na)+	Lys-Lys	297.192	422.539	0.752308	2.22462	2.25146e-07	8821.39	9153.08	8476.99	10487.7	10937	10160.1	19436.9	24555.8	19297.4	22701.2	22750.7	20366.9	14215.3	12718.3
	Neg_09320	Negative	(M+CH3COO)-	Sulfamethoxypyridazine	339.082	376.798	0.749117	0.663929	2.14446e-05	33256.1	36738.6	35991.2	38818.3	38626.1	35039.2	20307.8	21188.3	24650.2	29124.8	22870.6	26906.5	30380.8	35799.5
	Pos_04404	Positive	(M+NH4)+	Pyridoxamine 5'-phosphate	266.089	292.78	0.747402	3.05832	5.30245e-08	5301.98	5150.16	5325.06	5756	5901.96	6215.67	15914.1	19882	17229.8	16163.6	18910.1	14815.3	10813.8	8969.74
	Pos_00173	Positive	(M+H-H2O)+	3-Aminobutanoic acid	86.0588	271.201	0.746818	2.42915	0.0301946	11836.6	12420.1	11375.1	14362.8	12862.9	14935.1	33200.6	19302.9	25672.3	26894.5	17638.7	66260.7	18715.2	16294.4
	Pos_04839	Positive	M+	His-Gln	283.133	47.012	0.745064	2.08852	0.00184155	13391	13934.6	10166.7	12685.5	15091.8	12063.5	26387.9	38801.1	33060.6	25960.4	17185.3	20116.4	12901.9	19292.3
	Pos_17304	Positive	(M+H-H2O)+	1-Stearoyl-2-oleoyl-sn-glycerol 3-phosphocholine (SOPC)	770.62	39.708	0.740604	0.250551	0.000140631	12757.5	11492.6	17536.9	19121.2	16257.1	23183.3	10031.1	2790.1	2949.95	2575.8	3578.71	3216.75	7065.62	8702.51
	Pos_03398	Positive	(M+NH4)+	His-Gly	230.125	210.287	0.738645	4.98528	0.0168107	4634.26	2188.47	4559.31	5466.87	4776.51	3087.33	37727.7	15541.7	9395.28	11143.4	39010	10382	5103.83	4956.05
	Pos_09688	Positive	(M+Na)+	7,8-Dihydrofolate	466.143	86.008	0.735194	0.187363	4.42789e-10	11585.9	13895	14019.4	14169.2	13099.2	14708.7	2107.17	2205.94	2900.66	2678.47	2748.74	2624.83	4515.05	6309.71
	Neg_00605	Negative	(M-H)-	L-Proline	114.054	303.108	0.734902	0.413535	1.22112e-05	19952.8	22642.5	22052.8	18632.2	19955.2	17156.3	5513.82	5497.68	6800.43	9945.19	13137.2	8891.96	17084.3	16905.9
	Neg_01933	Negative	(M-H2O-H)-	Gluconolactone	159.026	96.9745	0.734606	1.35291	0.247509	99368.5	86268.7	83152.2	40610.9	94540.3	95390.1	128696	50034.6	161143	129455	165561	40660.4	92557.5	37744.8
	Neg_04893	Negative	(M-H)-	Melatonin	231.117	141.778	0.728112	1.29312	0.0124774	28741.2	58716.3	60663.4	59299.3	58832.7	57088.9	68318.4	75107.5	70879.5	67668.9	69273.7	66873.3	66181.1	63769
	Pos_01569	Positive	(M+H)+	D-Alanyl-D-alanine (D-Ala-D-Ala)	161.097	312.214	0.727364	0.366032	2.17396e-05	19451.7	16812.3	14407.8	19894.5	23161.6	15536.5	7928.25	6059.19	4154.32	9742.98	6768.21	5341.29	20987.1	14921.6
	Pos_03175	Positive	(M+H-H2O)+	Albuterol	222.148	331.588	0.710897	2.30263	1.74017e-10	7676.11	7014.49	7551.74	8317.19	8416.72	8503.77	17493.4	19607.1	17858.8	18354	18412.6	17602.8	11829.5	10848.4
	Pos_01928	Positive	(M+H)+	Gly-Val	175.108	246.403	0.708352	2.44693	0.00708441	8698.5	7563.34	12506.9	9225.79	7073.01	11931.9	15723.6	41598.3	24146.7	23125.1	19809.4	15070.2	17729	8341.03
	Neg_01653	Negative	(M-H)-	4-Hydroxy-3-methylbenzoic acid	151.037	297.994	0.703046	1.33725	2.39005e-05	35501.9	31118.8	32487.6	31463.6	28739.2	31902.2	43086.3	44445.6	46359.5	38035.5	41987.3	41785	35524.7	35548.9
	Neg_01401	Negative	(M-H)-	1-Naphthol	143.047	33.2015	0.701447	1.29535	0.000194716	38097.9	38074.5	38743	43060.7	35664	35994.1	51482.8	43818.9	55427.8	50656.4	49660.8	46410.1	42036.6	46998.9
	Pos_02434	Positive	(M+H)+	Phenylacetylglycine	194.081	209.44	0.69914	2.21504	0.00229349	7277.42	5361.62	13035.3	14808.3	7344.25	13957.5	15857.7	18626.5	30605.1	21816.2	19283.9	30665.5	23810.7	18659.8
	Pos_04211	Positive	M+	Glycerophosphocholine	258.11	376.361	0.698572	1.4226	0.00277741	23192	27040.9	27249.9	33149.4	44784.6	29274.2	44800.9	42119.4	43750.5	48841.5	41227.8	42002.2	45584.3	39571.5
	Pos_00705	Positive	(M+H)+	Picolinic acid	124.038	259.815	0.696458	1.86543	0.154313	16969	16381.4	14322.8	56861.8	18416.2	31917.9	22953.4	75369.5	24883.9	98359.3	40372	26958.8	23239.3	69278.9
	Neg_05397	Negative	(M+CH3COO)-	L-homocysteic acid	242.035	86.646	0.695574	2.1218	4.57933e-06	11112.5	8554.41	9201.64	8784.36	8719.66	8821.49	21065	20599.6	20950.9	20370.8	20004.4	14119.9	7553.97	12304.1
	Neg_04676	Negative	(M-H)-	2'-Deoxyuridine	227.065	177.81	0.694647	0.589197	0.00641927	31364.6	30820.2	32709.9	31733.9	31511.8	33531.9	34210.6	20892.3	5776.51	20368.5	14762.4	16922.4	33240.1	20279.8
	Neg_03601	Negative	(M-H)-	Sebacic acid	201.108	315.13	0.694209	0.525355	4.8936e-07	19442.5	21405.7	21393	21334.2	20999.4	22869	14068.3	9312.55	9979.6	12884.4	10130.5	10577.7	18500.3	14410.5
	Pos_03733	Positive	(M+H-H2O)+	Diethyl sebacate	241.185	33.742	0.692555	1.48443	0.035734	38587.5	37708.7	1603.75	41320.2	35189.8	43296.4	51183.4	45793.2	54099.8	50624.4	42943.9	48836.1	44259.1	82246.9
	Pos_01236	Positive	(M+H)+	Ala-Gly	147.082	287.292	0.692172	2.17237	9.07171e-05	10073.2	10399.1	1302.59	11343.9	11845.5	10729.1	19416.7	19520	20377.8	22536	20998.7	18137.4	15566.5	12555.6
	Pos_01123	Positive	(M+H-H2O)+	Pregabalin	142.121	208.886	0.687637	0.481777	2.31181e-07	18861.8	18209.9	17536	20009.3	20275.3	19126.9	7243.18	8511.66	8465.46	11950.8	8569.54	10191.2	21745	16981.8
	Neg_02687	Negative	M-	4-Hydroxyphenylpyruvate	180.041	41.777	0.685702	1.51472	0.00524958	24199.8	19716.9	26043.3	40174.3	16756.6	19394.2	37470.2	39004	38432.6	36211.8	36700.3	33761.6	30542.1	27803
	Pos_00744	Positive	(M+Na)+	L-2-Aminobutyric acid	126.054	297.885	0.68548	1.86714	4.12971e-05	8252.91	13436.4	12192.7	13912.4	10607	14213.9	22500.3	17324.7	24011.1	21737.7	24541.5	25467.7	18805.6	16460.3
	Pos_02432	Positive	M+	D-Pinitol	194.081	226.065	0.683315	2.1247	1.64131e-08	7931.83	8349.1	8106.82	9251.27	8387.55	9285.98	15800.3	18636	19384.2	17515.8	18510.1	19177.1	15958.5	10779.9
	Pos_03248	Positive	(M+Na)+	NG,NG-dimethyl-L-arginine(ADMA)	225.13	327.544	0.680118	1.86814	3.36441e-06	8096.54	10113.5	10533.7	13567	14590.7	12029.5	22689.1	22048.8	21687.6	21623.2	21433.4	19290.5	15605	14273.9
	Pos_04486	Positive	(M+H)+	Leu-His	269.173	286.947	0.67572	0.315934	3.65249e-07	13172.1	14222.5	11726.4	13215.8	17267.4	13927.6	3676.27	5446.9	4420.11	3613.99	5016.68	4216.5	11785.4	8513.05
	Pos_03243	Positive	(M+Na)+	Pro-Ser	225.098	249.407	0.674682	2.26824	0.0371948	22847.9	6540.84	20169.3	9858.38	1389.7	9649.06	15880.5	44773.2	20177.6	41149.9	19416.5	18411.4	24838.7	28259.6
	Pos_02616	Positive	(2M+H)+	3,3-Dimethylacrylic acid	201.111	215.71	0.670887	1.54324	0.000216218	17587.5	14117.6	19000.2	21789.7	24917.6	18771.4	25833.6	33807.3	28569.2	29309.9	31477.3	30302.1	24428.1	24973.3
	Neg_03057	Negative	(M+CH3COO)-	Fluorouracil	189.035	144.231	0.669743	1.42943	0.00941241	28806.3	13859.8	39501.3	35363.4	23482.3	35308.4	44014.1	41903	42552.4	39091.2	41053.4	43425.7	36293.8	38210.1
	Neg_10106	Negative	(2M-H)-	Acamprosate	361.083	232.369	0.668489	1.98477	4.12725e-08	9907.11	8384.43	9523.56	9663.99	9204.02	9477.59	19014.9	19385.2	19691.7	15883.6	19423.4	18067.1	12749.1	12523
	Pos_00211	Positive	(M+H)+	L-Alanine	90.0538	337.135	0.667252	0.624587	0.00215668	25574.8	29649.6	29105.7	30984.7	36918.4	26255.6	14585.5	14949.6	17022.7	28839.2	16903.1	19181.7	33596.2	31457.2
	Neg_11737	Negative	(M-H)-	Bisindolylmaleimide I	411.19	46.4645	0.658081	0.667714	0.331669	25294.4	40219.7	50443.9	48115.1	157213	164810	22984.4	62050.2	53240	57566.3	67460.4	61272.6	43028.8	119599
	Pos_01891	Positive	(M+H-H2O)+	5-Hydroxyindoleacetate	174.054	66.238	0.65623	2.04192	1.53799e-05	13745.6	8008.13	6147.41	6987.46	11192.2	8048.92	18009.5	17589.2	18317.4	18192.8	19691.3	18728.4	11327.1	10243.1
	Pos_01647	Positive	(M+NH4)+	Butyl lactate	164.127	316.156	0.654922	1.4769	2.61595e-07	16795.1	19225.4	18549.2	19581.3	20745	18833.1	27371	25842.5	27768.4	29091.2	29063.3	28830.5	28055.4	24396.6
	Pos_04920	Positive	(M+NH4)+	Allopurinol riboside	286.113	45.849	0.654066	1.97628	0.00558702	15766.7	15194.9	8162.36	8802.31	15740.5	8084.61	18592.5	28881.8	16443.6	16822.8	32288.4	28772	13557.2	20823.8
	Neg_02517	Negative	(M+CH3COO)-	Isocaproic acid	175.093	102.67	0.650263	0.881324	0.0940711	128409	142099	156899	170088	124248	143094	144985	105195	123828	119783	141822	126589	128488	174444
	Pos_06009	Positive	(M+H-H2O)+	(-)-Usnic acid	327.087	254.103	0.649702	3.60826	0.0044721	4355.47	2982.1	4440.84	4264.26	4688.6	5695.25	13359.2	11038.6	11526.1	16525.3	11904	31000.3	6660.49	6960.23
	Pos_01211	Positive	M+	(3-Carboxypropyl)trimethylammonium cation	146.117	373.349	0.649065	1.20882	0.0173373	55625.6	56480.3	56754.4	69268	74866.3	61903.3	67268.9	79061	68196.2	88865.6	75722.8	74070.5	69568.5	63654.2
	Neg_03002	Negative	(M-H)-	Kynurenic acid	188.031	167.81	0.64698	0.627028	1.789e-08	24795.1	22424.4	23715.1	22354.8	22717.5	23477.5	13486.7	14253.4	15548.6	13800.3	14586.6	15785.1	20443	15374.7
	Pos_03011	Positive	(M+Na)+	Zingerone	217.091	38.501	0.646927	0.631018	0.345162	96403.8	102355	95832.9	89689.3	81948.4	4188.64	121865	15762.3	133265	1037.67	23475.8	1436.27	14149.5	14714.6
	Pos_00766	Positive	(M+H)+	Imidazoleacetic acid	127.049	312.098	0.645093	0.535895	3.21274e-05	17005.3	19565.9	17968.7	19539	24472.8	18828.8	8928.79	10418.5	8541.87	13137.9	10105.7	11770.8	22005.3	18792.2
	Neg_01903	Negative	(M-H)-	Acetyl-DL-Valine	158.079	205.501	0.644699	0.267032	5.09185e-08	11253.5	10821.1	11019	12256.1	13547.3	11470.1	2127.76	2059.33	4881.76	2895.62	3324.77	3501.05	5895.3	5379.49
	Pos_09407	Positive	(2M+H)+	Deoxycytidine	455.189	200.293	0.641855	0.409383	5.12952e-07	13806.6	15227.7	15434.3	14214.3	15693.4	13407.8	4517.42	9037.36	5137.57	6411.95	5265.5	5567.58	10405.8	10294.3
	Pos_04222	Positive	(M+H-2H2O)+	Amitraz	258.18	158.613	0.641261	2.49524	3.55306e-06	5008.2	5189.14	6554.68	6350.73	6851.95	5311.65	14607.6	15283.3	14166.4	13984	18382.8	11574.1	12606.6	9278.7
	Pos_00001	Positive	(M+H)+	Guanidine	60.0545	274.627	0.632265	2.46077	1.26628e-12	5717.17	5763.11	5439.67	5758.36	5280	5345.92	13814.6	13808.9	13214.2	13681.9	14264.8	13169.5	8862.5	7985.2
	Pos_02711	Positive	(M+H)+	Acetylcarnitine	204.123	296.939	0.631053	0.814297	0.0919716	74923.2	75322.9	77368.8	85638.3	97848.3	90982.7	48768	53498.8	88179.7	65181.9	60823.7	92393.4	84984.3	71108.7
	Pos_03239	Positive	(M+H)+	3,5-Dimethoxy-4-hydroxycinnamic acid	225.081	24.116	0.628423	2.60968	7.01937e-07	5109.93	4326.96	5688.49	4613.17	5324.37	5873.75	11775.1	13072.2	12820.1	13910.1	16746.2	12411.2	7282.99	7961.94
	Pos_02563	Positive	(M+H-H2O)+	Pro-Thr	199.107	293.58	0.626502	1.27537	0.00403768	35132.8	35759.9	40364.1	39598.5	42334.8	36970.9	41445.1	54110.2	44887.8	58628.3	45878.5	48591.4	47539.6	42020.2
	Pos_05651	Positive	(M+H)+	Benzylbutylphthalate	313.149	240.633	0.624174	1.78644	0.00280288	11335.6	11394.7	10227	15384.9	13381.4	15147.8	18594.1	17260.1	29665.7	16912.2	27773.5	27120.7	15115.7	13103.9
	Neg_02811	Negative	(M-H)-	3-Methoxy-4-hydroxyphenylethylene glycol	183.062	259.037	0.6181	2.65692	3.54994e-05	5457.41	4605.02	5077.94	5198.8	4661.84	5469.81	12485.3	12761.2	19298	11168.3	12688.7	12557.1	8488.74	7583.55
	Pos_02762	Positive	M+	Monoethylglycylxylidide (MEGX)	206.138	260.7	0.616753	2.46391	0.0161894	6990.32	11874.3	3270.36	3836.97	15468.2	6679.18	25655.5	9473	7618.24	26039.5	26081.8	23693.8	19728	19048
	Pos_03363	Positive	(M+H-H2O)+	Pro-Met	229.098	230.012	0.613141	0.418046	0.165341	54212.3	53716.1	3228.85	4488.3	57297.2	6817.25	6249.04	9051.98	8580.37	7481.49	20450.3	23334.8	51520.6	5513.37
	Neg_00602	Negative	(M-H)-	Maleamic acid	114.022	225.777	0.612967	0.715385	0.000350921	28273.6	27616.6	36753.7	30413.1	31063.4	31484.5	19555	20318.7	20575.1	25221.5	22052.3	25056.3	27850.6	26425.7
	Pos_03331	Positive	(M+H-2H2O)+	Gemcitabine	228.063	229.211	0.612687	3.35752	0.00754214	2527	2435.69	4489.02	10132.9	2357.41	4455.73	16810.3	18929.3	17483.8	578.975	18253.8	16575	6356.84	10737
	Pos_01229	Positive	(M+H)+	2,2-Dimethyl Succinic acid	147.064	254.623	0.612613	1.78128	3.4261e-08	10233.8	8798.64	10275.2	9741.54	10139	10237.7	17127	18127	17489.3	17359.6	19545.4	16205.9	16478	14712
	Neg_00421	Negative	(M-H)-	Malonic acid	103.002	384.314	0.611465	0.628388	2.96077e-05	18739.7	20136.1	22913.7	23432.2	24574.2	22330.6	12262.3	15417.3	12396.9	16338.3	12510.1	14101.7	17054.3	23724.7
	Neg_03220	Negative	(M-H2O-H)-	Perseitol	193.067	287.545	0.609089	1.61812	0.112546	25130.9	23138.2	24379.1	25457.9	23127.2	26104.5	30085.7	30469	83242.3	32901.5	30949.8	30762.6	25722.5	28089.2
	Pos_00747	Positive	(M+NH4)+	Quinone	126.065	224.485	0.60416	2.84345	8.95474e-06	5496.01	4755.18	5529.06	1643.16	1818.28	6325.66	13274.8	12801	10982.2	11401.2	13367.2	10873.2	9626.71	7130.86
	Neg_14348	Negative	(2M-H)-	Muramic acid	501.184	24.818	0.603604	0.822624	0.0213667	52616.7	56696.7	57079.2	70176.6	72688.6	60912.3	60047.8	45844.8	44027.1	51812.4	52795.9	49982.8	68824.6	66510.3
	Pos_03830	Positive	(M+H)+	Uridine	245.076	157.599	0.601437	1.40626	8.53807e-07	18191.7	16876.9	18193.2	19485.5	21588.6	18986.5	26226.4	27079.5	26085.9	26589.8	27719.1	25659.4	16036.4	17979.6
	Neg_03541	Negative	(M+CH3COO)-	Ethosuximide	200.096	127.077	0.599931	1.28472	0.0662502	53679.3	40623.4	42644.7	52479.5	47300.3	48377.1	56008.8	52814.8	62442.7	56266.2	48146.4	90600.4	51955.7	64537.4
	Neg_06837	Negative	(M+CH3COO)-	3-Hydroxydodecanoic acid	275.193	43.6715	0.595179	0.703649	0.00348478	33164.8	32668.4	37721.8	31684.4	26713.9	31909.4	19994.9	22202.6	29636.5	17758.8	28275.3	18543.4	33617.2	33997.8
	Neg_12727	Negative	(M-H)-	Estrone 3-glucuronide	445.192	141.781	0.594766	1.45316	4.75916e-05	16592.5	12914.9	19575.5	18229	20657.9	17418.1	25835.7	25781.3	25324.9	24021.9	25253.9	26927.6	21531.6	20635.5
	Pos_04662	Positive	M+	gamma-L-Glutamyl-L-glutamic acid	276.09	266.122	0.593599	2.27752	2.94545e-09	5047.43	4882.51	5399.22	6242.33	6007.79	6347.37	12315.4	12564.4	13879.4	13142.4	13245.9	12121.3	7928.86	9551.96
	Pos_04924	Positive	(M+H-H2O)+	Arg-Glu	286.151	378.529	0.590523	0.543346	0.000179807	15533.1	17983.1	15934.1	17617.2	21134.4	16091.5	7028.44	8141.34	8173.91	14453.4	8791.81	10078.5	15707.5	18230.2
	Pos_02356	Positive	(M+NH4)+	Desoxypeganine	190.142	97.6565	0.590504	1.85012	1.39324e-07	8874.63	8158.57	6434.51	9015.34	9014.84	9804.46	15508.6	14764.5	15637.3	16350.9	16888.1	15765.8	13703.3	3761.78
	Pos_08593	Positive	(M+H)+	N,N'-Diacetylchitobiose	425.18	329.465	0.590361	1.4761	1.06295e-06	14577.2	14449.3	14669.5	16722.5	17035.5	15892.9	21173.6	23540.1	21686.7	24616.8	23695.5	23076.3	20973.1	17094.2
	Pos_02513	Positive	(M+Na)+	L-Arginine	197.1	241.099	0.589442	2.53924	5.25045e-08	5232.79	4371.91	4429.18	4721.46	4679.32	4564.9	12525.5	13502.7	11102.2	11247.4	12459.9	10259.8	8275	6630.1
	Neg_00977	Negative	(M-H)-	ketoisocaproic acid	129.053	153.958	0.589009	0.813484	0.026567	51606.9	46340.8	53194.3	68020.1	69728	61362	45052.6	55232.1	46338.6	47654.4	46282.1	44364.7	43201.8	45689.4
	Pos_01225	Positive	(M+H)+	Coumarin	147.043	37.915	0.586377	2.23527	2.69258e-05	5186.55	3502.55	5201.74	6406.03	7017.47	9661.61	12984	14025.2	13984.3	16463.9	12309.3	12884.6	9903.91	10088.7
	Neg_02492	Negative	(2M-H)-	Pyruvate	175.021	379.685	0.585545	1.64469	2.62186e-05	12066.9	10479.7	9847.84	12478.8	10519.6	14749.8	20388.3	21133.6	20168.4	16864.3	17205.3	19603.1	15170.8	14047.7
	Neg_08117	Negative	M-	3-Iodo-L-tyrosine (MIT)	306.974	22.303	0.585404	0.682637	0.151317	44879.3	48640.4	48570.6	42075.9	51251.1	51410.9	18472.5	18765	16972.6	71180.5	17095.2	53313.7	61097.1	12718.9
	Pos_05399	Positive	(M+H)+	Quercetin	303.05	226.105	0.573785	2.36746	4.44905e-10	4480.24	4776.52	4472.8	5392.96	5385.11	5035.89	10821.9	11943.1	11469.4	12372.7	12037.4	11298.6	7237.31	6458.83
	Neg_02761	Negative	(M-H)-	Saccharin	181.991	44.102	0.572987	1.30899	0.548076	6685.5	6377.92	225787	4204.73	253439	250619	192619	219707	181353	197362	8190.73	178734	236797	8379.12
	Pos_08090	Positive	(M+H-2H2O)+	Troglitazone	406.153	39.327	0.571712	2.01081	0.130514	3989.44	20432.3	3228.83	25246.3	28008	5481.75	44281.6	47134.4	11997.9	10288.4	45591.4	14413.3	9266.07	8204.45
	Pos_02799	Positive	(M+NH4)+	n-Propyl cinnamate	208.133	340.427	0.570861	1.5594	1.50693e-06	11824.2	10869	11533.5	13395.1	13827.3	12802.3	18569.2	20109.8	18425.1	19047.3	21406	18230.2	17021.2	14142.5
	Neg_00827	Negative	(M-H)-	Taurine	124.005	286.389	0.570455	0.670354	4.49689e-05	20523.5	24481	22531.3	21906.1	22471	19350	12498	12854.9	14411.6	17536.1	14938.3	15753.7	18519.4	21307.7
	Pos_01533	Positive	(M+NH4)+	Kojic Acid	160.06	296.134	0.569787	1.72102	0.000136686	9815.48	10323.1	10173.1	8173.26	12062.5	12052.9	15187.1	17963.4	16398.3	21025.9	15715.8	21446	17840.3	14085.5
	Neg_05729	Negative	(M-H)-	Gamma-Glutamylcysteine	249.056	158.708	0.569729	2.28334	5.55362e-06	6536.62	3861.35	3976.02	5041.91	8626.78	4791.01	13229.4	12010.7	13018.6	11383.1	13210.9	12117.7	3326.85	9882.98
	Neg_03144	Negative	(M-H2O-H)-	Sedoheptulose	191.06	24.94	0.567189	2.2814	8.90769e-06	4603.34	5991.37	5684.8	4992.37	5742.83	5863.01	14519.7	8676.16	12525.7	13333.3	12579.7	13372.6	9145.28	6874.74
	Neg_01593	Negative	(M+CH3COO)-	D-Lactic acid	149.042	216.737	0.563111	1.23531	2.12641e-06	28775.4	27468.7	28816.9	28417.4	29173.4	29132.2	36548.7	37285.1	36384.2	33479.9	34682.2	33826.3	11817.9	26967.8
	Pos_01691	Positive	(M+NH4)+	D-Arabinono-1,4-lactone	166.071	154.363	0.562049	0.67649	2.24644e-05	20211.3	19809.4	18352.4	22356.7	24211.2	22835.5	13802	13853.2	14473.3	15203.3	14094.2	15013.4	25817.1	18946
	Pos_00887	Positive	(M+H)+	Creatine	132.076	337.609	0.561469	0.897036	0.30279	147163	170577	167960	182589	224109	168128	136208	137833	145589	221240	151480	158980	218702	200727
	Neg_02661	Negative	(M-H)-	Alpha-D-Glucose	179.052	338.171	0.559278	0.675914	8.04133e-05	19437	18424.8	22497.8	21806	22966.6	25281.8	14233.9	14070.1	14760.3	13327.5	16312.9	15444	18883.9	24291.2
	Neg_09327	Negative	(M-H2O-H)-	Matairesinol	339.125	24.745	0.558986	1.4917	0.00658415	18152.5	12543.2	16182.9	23928.9	15531.5	19508.8	31905.6	23148.6	25688.6	25400.4	19767	31982.8	30209.6	20087.2
	Pos_00466	Positive	(M+H-2H2O)+	2-Methylglutaric acid	111.043	119.261	0.558551	1.13462	0.00539164	62860.7	54553.4	59780.5	64691.3	64890.5	68691.6	66537	71797.2	71172.1	69263.6	76214.3	71031	96129.7	73344.7
	Pos_01664	Positive	(M+H)+	4-Hydroxycinnamic acid	165.053	233.109	0.554671	1.87773	0.000788162	7628.68	7492.57	7829.09	9882.93	8947.17	9841.49	22134.1	14749.6	14112.4	19466.4	13074.9	13394.8	16348.3	12926.7
	Pos_03185	Positive	(M+H-H2O)+	L-Cystine	223.017	52.381	0.551783	2.92974	2.66572e-08	3174.68	2894.95	2995.76	3644.39	3073.21	3753.25	9235.86	11294.5	9546.69	9582.32	8652.67	8924.15	4983.41	5365.37
	Pos_00402	Positive	(M+H)+	L-Serine	106.049	370.078	0.547093	0.577911	0.00942591	15580.5	19594.7	18182.7	21265.6	26089.4	17461.3	5969.24	8303.59	9306.44	20755.2	10810.6	13149.2	21795.1	19864.3
	Pos_10414	Positive	(2M+H)+	Asn-Asn	493.208	195.452	0.546962	2.73934	3.9309e-09	3485.97	3267.36	3220.32	4170.26	3275.67	3690.01	9634.82	9822.06	10298.4	8743.98	10451.7	8875.3	6708.28	5744.32
	Pos_02645	Positive	(M+NH4)+	3-Methoxy-4-hydroxyphenylethyleneglycol	202.106	336.978	0.545922	1.94955	7.01902e-07	6575.93	5855.53	5798.53	6575.98	7117.55	7714.85	12538	14309.8	13722.4	10819.2	12778	13109.6	10486.4	7900.36
	Pos_08089	Positive	(M+Na)+	Prazosin	406.141	137.49	0.542732	2.23174	4.71749e-08	5351.99	4670.26	5217.27	5288.31	5679.08	3510.4	10720.8	11620.9	10629.6	11217	11964.6	10168.4	7053.68	7113.34
	Pos_09851	Positive	(M+H)+	Terfenadine	472.323	293.78	0.538612	5.02578	0.0228823	1062.15	1214.53	1025.55	1113.47	1192.25	8174.55	16131.5	17394.7	1390.72	17450.5	1312.17	15588.3	1482.43	1233.45
	Pos_00676	Positive	(M+Na)+	Glutaraldehyde	123.043	292.485	0.538212	0.624403	0.00116008	17014.1	18699.6	18178.1	19283.1	21259.8	18460.6	8902.1	9375.98	9516.16	18325.6	11194.3	13178.1	23467	20037.2
	Pos_04041	Positive	(M+H)+	5'-Deoxyadenosine	252.108	36.4575	0.534145	1.89492	0.0891202	4395.14	4402.62	19372.2	13754.2	23440.3	12107.1	14116.5	18634	9920.11	36525.9	42709.4	24896.8	14017.2	12927.9
	Pos_01324	Positive	(M+H)+	3-Phenylpropanoic acid	151.079	124.931	0.530409	1.48581	0.000523058	8710.87	12040.5	13846	16959.5	16421.7	16326.1	21061	19421.9	20972	22009.6	21218	20578	8975.54	17183.7
	Pos_08331	Positive	(M+K)+	Lithocholic acid	415.254	96.073	0.523998	1.1508	0.517513	127064	205484	140631	232609	249369	231608	384715	168016	180575	309019	151732	171669	230358	156558
	Neg_03139	Negative	(M-H)-	Quinate	191.051	337.375	0.518226	0.620902	0.00352969	17064.1	13830.2	24172.7	24050.7	15290.1	18224.4	11598.1	10834.1	10604.8	14068.3	10664.1	12164.4	15329.1	17337.1
	Pos_04547	Positive	(M+H)+	5,2'-O-dimethylcytidine	272.125	131.333	0.514756	1.31292	0.000119513	21006	16056.3	18418.2	18291.2	20711.7	21041.3	23505.4	25850.5	24732	26276.8	27106.3	24203	28580.2	21370.4
	Neg_01851	Negative	(M-H)-	Allantoin	157.033	179.345	0.514519	0.681397	7.89067e-08	17013.9	17385.2	18023	16557.3	17725.9	16422.1	11142.9	10776.1	11483.4	12405.9	11769.4	12692.9	16178.2	14989.1
	Pos_01813	Positive	(M+Na)+	(S)-Citramalic acid	171.028	191.094	0.510153	1.55473	2.98193e-07	8495.02	9845.29	9518.04	10925.4	9454.53	10818.5	14554.5	15704.2	15692.9	15522.8	14434.9	15908.3	13271.1	12823.7
	Pos_02837	Positive	(M+H)+	N-Benzyloxycarbonylglycine	210.079	194.054	0.508169	1.35666	0.318577	47003.6	25014.9	30543.8	34351.7	118369	45693.3	112115	76131.2	59058.2	59725	51899.1	49394.3	74335.4	57657.6
	Neg_07054	Negative	(M-H)-	3'-O-Methylinosine	281.082	159.407	0.505399	0.627844	0.000755119	19413.4	21793	14168	15711.7	14747.4	15331.8	10107	11342.6	10930.4	8940.18	11966	10230	15365.2	11813
	Pos_00928	Positive	(M+H)+	Mandelonitrile	134.059	45.2875	0.503997	1.57065	0.0961476	6060.24	7181.56	31300.6	13412.5	36220.3	16562	20530.2	35724.6	35979.7	30896.2	26143.6	24655.1	10120.9	20691.3
	Pos_04524	Positive	(M+H)+	Tolbutamide	271.123	34.8905	0.503641	1.36041	0.0918375	28570.3	13016.5	21979.4	32017.1	44611.1	32235	33081	48019	25907.9	38496.6	46627.7	42442.9	726.748	466.483
	Neg_02589	Negative	(2M-H)-	Beta-Alanine	177.088	84.986	0.500931	1.16574	0.0191831	50292.6	52581.7	41493.6	44390.5	42257.2	45548.8	47079.7	54860.4	54817.2	54417.9	49605.5	61621.1	45106.4	51300.4
	Neg_06156	Negative	(M-H)-	Fructose 1-phosphate	259.02	222.11	0.483898	2.35905	2.08273e-05	4078.79	4590.51	1928.8	3910.11	3960.34	4166.4	10099	10125.9	9612.07	6811.42	9185.73	7562.88	5216.92	5109.98
	Pos_03522	Positive	(M+NH4)+	Undecanedioic acid	234.17	341.012	0.483631	2.25604	6.20031e-06	4037.82	3628.12	3608.94	3594.25	4477.2	4735.78	8624.02	10953.8	7861.73	7566.73	10336.9	8987.01	6890.58	5955.35
	Neg_05332	Negative	(M-H2O-H)-	D-Mannose-6-phosphate	241.011	283.933	0.483059	0.693509	0.000960352	19508.7	19008.5	13261.4	20339.6	19893.6	19341.5	14168.5	10845.7	12806.8	14663.2	11542	13198.4	13286.9	11342.7
	Neg_00201	Negative	(M-H)-	Sarcosine	88.0395	247.205	0.480024	0.30695	2.72978e-08	6151.63	7041.42	6778.22	7339.68	7724.95	5960.03	1826.91	2406.28	1753.52	2347.18	1838.48	2411.32	4254.85	3651.29
	Pos_03864	Positive	(M+NH4)+	Tebuthiuron	246.144	377.085	0.479293	1.98607	5.5789e-06	4974.61	4793	4802.82	4659.2	5275.13	5544.36	9130.13	11346.4	11478.2	10506.4	8275.21	8943.37	7085.23	6160.73
	Pos_05477	Positive	(M+H-2H2O)+	Sulpiride	306.133	327.743	0.473472	1.76212	2.35665e-06	6381.79	6755.34	7327.53	5298.11	5893.91	5856.94	11320.2	10984	11652	12144.9	10698.2	9304.16	10301.9	8116.84
	Neg_15984	Negative	(M-H)-	Ginkgetin	565.115	20.601	0.467424	0.563307	1.48635e-06	10986.3	10062.3	10778.2	10348.8	12092.6	9012.54	6471.5	5341.68	5474.02	6012.11	6040.58	6306.62	11006.1	10068.3
	Pos_03955	Positive	(M+H)+	Val-Met	249.132	254.47	0.465048	3.44984	3.24017e-09	2171.26	1432.95	1726.68	2205.15	1690.99	1617.81	5708.54	6953.86	5869.4	5963.68	6535.78	6381.72	3759.55	3730.31
	Pos_02890	Positive	(M+H)+	Metaproterenol	212.127	241.082	0.463919	1.30858	2.65631e-05	15588.4	15824.3	14264	16433.8	15933.5	14608.2	18072.6	19996.7	19742.9	22217.3	20295.4	20917.8	19222.8	17113.3
	Pos_05275	Positive	(M+Na)+	.gamma.-L-Glu-.epsilon.-L-Lys	298.132	356.073	0.458439	0.842046	0.0287174	33825.4	42096.4	42249.8	42784.7	49547.9	37417.7	35646.4	29416	32932.4	36825.8	38793.6	35147.2	46718.2	46545.7
	Pos_00895	Positive	(M+H-H2O)+	Trolamine	132.101	77.035	0.457818	0.674846	0.158106	18416.1	17584.4	20323	32720.8	38990.1	49160.1	11788	14978	15599.9	21163.5	35457.3	20592.3	27308.5	18028.5
	Neg_08367	Negative	(M-H)-	Sulfaphenazole	313.083	413.389	0.456035	1.70768	1.39816e-07	6184.44	5294.95	6087.12	6466.32	5919.78	6627.76	10927.2	10641.5	11182.1	9583.44	10503.4	9630.1	8535.06	7892.48
	Pos_03826	Positive	(M+Na)+	Flavone	245.06	215.734	0.455242	1.70585	0.000197583	7054.65	7246.32	6765.92	6068.61	7161.21	6631.41	9669.69	9840.71	11865.5	15261.1	11323.8	11856.3	10424.1	8678.98
	Pos_06072	Positive	(M+H)+	(4Z,7Z,10Z,13Z,16Z,19Z)-4,7,10,13,1 6,19-Docosahexaenoic acid	329.255	32.045	0.454852	1.47182	0.256943	9933.36	9724.32	43317	40262.3	40140	14406.6	52181.4	50786.8	42775.8	37831.1	1126.54	47528	64551.9	11344.1
	Neg_03251	Negative	M-	2-keto-D-Gluconic acid	194.041	206.071	0.453272	1.56434	1.77716e-06	8258.41	7489.91	7207.93	8140.03	7404.34	7590.2	11309.8	12355.2	12057.5	11072.9	13787	11519.4	9244.79	9009.72
	Pos_02223	Positive	(M+H-H2O)+	Lys-Gly	186.122	134.396	0.45192	1.82468	0.00925436	8834.72	7621.5	806.222	8326.91	7862.58	8961.67	9025.27	15817	11164.9	15382	10044	15957.9	15079.2	11472.3
	Pos_05967	Positive	(M+K)+	His-Met	325.079	25.956	0.450729	2.83413	0.113827	3100	6690.24	5605.62	5261.68	6120.37	1420.16	4892.94	8735.96	4916.06	4194.1	30807.8	26370.2	10426.6	13080.6
	Pos_05549	Positive	(M+Na)+	Abacavir	309.143	247.368	0.450186	1.57522	0.00370938	9044.98	7204.56	7615.83	12776.5	5995.17	12341.1	12216.5	14298.1	13423	14547.2	18083.6	14034.4	11094	9645.09
	Neg_11315	Negative	(2M-H)-	O-Phospho-L-homoserine	397.035	25.3865	0.449326	1.36631	0.0470939	11179.4	18649.8	28848.7	22977.7	16726	17696.3	26183.9	24367.4	24121.5	20012.7	30974.3	32938.4	14506.6	24717.6
	Pos_01759	Positive	(M+H)+	2-Hydroxy-3-methoxybenzoic acid	169.049	232.466	0.448588	1.70978	0.0199683	3466.14	3536.86	9354.86	11737	13567.5	12162.9	17327.7	10736.2	11044.2	17157.5	18302.9	17460.6	8555.29	5617.11
	Pos_04706	Positive	(M+H)+	Stearidonic Acid	277.216	201.078	0.447416	1.34941	2.43106e-07	12004.1	11472.6	11116.5	12549.2	12301.7	12268	15129.2	16397.9	16333.8	16300.3	16928.5	15679.1	16379.9	12686.7
	Pos_00546	Positive	(M+H-H2O)+	Ornithine	115.085	381.722	0.446322	0.577912	0.00964889	11090.6	12671.6	11619.3	13362.2	18709.7	11450.1	3103.01	7965.88	6533.51	12894.7	6993.27	8108.9	13359.9	14207.3
	Neg_02504	Negative	(M+CH3COO)-	alpha-ketoisovaleric acid	175.057	216.423	0.44435	1.40617	0.0103949	14667.6	13736.8	14211.5	16199.8	12463	12887.9	17930.7	19529.9	18564.7	16388.4	17841.5	28097	15275.9	14677.8
	Pos_04636	Positive	(M+NH4)+	2'-O-methylcytidine	275.134	334.058	0.443459	2.87271	2.18497e-05	1734.31	1881.04	2287.14	2463.98	2643.2	2855.93	7988.22	8443.55	6941.76	5400.17	5589.34	5468.71	2955.19	2898.39
	Pos_00339	Positive	(M+NH4)+	3-Butynoic acid	102.054	287.74	0.440944	1.90693	4.1977e-05	4243.93	4683.85	4313.74	6544.1	4648.03	4171.55	10619.7	8351.41	10507.1	9109.65	8433.99	7526.23	6499.01	4851.65
	Pos_01640	Positive	(M+H)+	Dimethylaminopurine	164.091	142.882	0.439806	1.40184	0.0765335	22344.1	23014.1	23014.7	14606.2	12600.8	11551.2	26086.2	21653.9	38542.3	23551.4	20542.7	19804	29774.2	34291.5
	Neg_08880	Negative	(2M-H)-	D-Quinovose	327.124	142.629	0.433264	1.17624	0.0962745	50746.1	48815.2	42513.8	36865.2	25098.7	39979.3	45554.2	48957	48585	44850.2	51399.9	47676.9	59799.8	51554.1
	Pos_02881	Positive	(M+Na)+	N-Acetyl-L-glutamate	212.054	374.062	0.433175	1.63164	0.00123235	5831.56	8007.77	7616.44	7380.37	8747.75	7152.18	15173.2	14271.6	10919.4	13217.6	10254.1	9157.43	10550.4	8720.79
	Neg_08645	Negative	(M-H2O-H)-	D-Fructose 1,6-bisphosphate	320.971	117.017	0.426509	1.16166	2.03385e-05	24425.8	26348.4	25611.5	24575.8	24077.7	24107.2	29493.6	28301.3	27480.3	28994.1	28816.1	30171.6	29045.7	34830.3
	Neg_02137	Negative	(M-H)-	4-Methoxyphenylacetic acid	165.052	122.68	0.423604	1.12032	0.206821	84098.2	83014.8	74571.2	54858.1	103706	79281.1	94811.3	90754.3	99625.7	80317.5	82017.7	89701.9	98347.5	84467.4
	Pos_03276	Positive	(M+H-H2O)+	Pro-Gln	226.118	303.997	0.422831	1.48464	0.000156735	8340.24	9373.65	6684.13	8798.97	10014.5	8164.93	13102.9	10901.8	11926.5	14385.8	13825.1	12133.3	10414	9326.85
	Pos_01476	Positive	(M+H)+	N-Tigloylglycine	158.08	377.412	0.417628	1.2706	0.027264	18152.6	19940	18781.2	23203.4	26086.2	20176.6	22205	24525.8	30292.8	33786.7	23185.5	26532.2	19758.7	21885.9
	Pos_03017	Positive	(M+H)+	N-.alpha.-Acetyl-L-arginine	217.129	359.252	0.416908	0.704387	0.00716987	14466.1	16913.3	14313.9	17390.9	18305.6	14777.9	9078.46	8953.3	10098	16955.8	10694.9	11958.7	17370.1	16882.3
	Neg_09336	Negative	(M-H)-	Norethindrone Acetate	339.189	675.18	0.416728	1.6732	0.0789437	12089.1	11736.6	3278	1867.02	21328.3	12203.7	20535.1	11905.6	13596.6	20729.3	13221.9	24590.6	26303.2	16571.7
	Pos_06547	Positive	(M+H)+	Evoxine	348.148	255.555	0.413721	1.44645	1.83267e-05	8291.37	7755.8	7983.18	8102.13	8534.18	9614.29	10930.8	13399.8	11399.1	12327.6	13165.3	11506.4	10775.5	10517.1
	Pos_02158	Positive	(M+H)+	Phosphorylcholine	184.072	496.46	0.409386	2.0104	0.00156832	3380.78	3283.85	3491.12	4217.37	6602.19	4143.32	8482.71	11782.4	9395.89	7981.16	7096.76	5759.67	6949.86	5761.19
	Neg_01954	Negative	(M-H)-	3-Hydroxyvalproic acid	159.099	171.498	0.408258	0.860232	0.00013478	28541.4	27587.7	26282	26668	27811.2	27155.4	23070.2	21061.9	24881	24002.2	24001.4	24100.6	26822.3	25986.5
	Neg_03156	Negative	(M-H2O-H)-	Jasmonic acid	191.103	132.862	0.408149	1.37983	0.426072	32646.3	34511.7	33194.8	29713.2	35854.9	35689.3	28345.3	34045.1	33623	32695.8	122888	26591.4	31369.3	34448.7
	Pos_01712	Positive	(M+H)+	Atrolactic acid	167.07	256.972	0.406537	1.70943	0.000795749	5541.55	5412.06	5328.26	6208.56	6442.95	4930.47	11219.5	10408.1	10055.4	6714.09	11740.8	7749.86	7266.04	2972.11
	Pos_07274	Positive	(M+Na)+	Triflupromazine	375.106	331.801	0.406334	2.08696	0.000114006	3873.22	1832.62	3639.11	4372.95	2634.26	4399.68	6216.83	7345.75	6078.25	8723.82	6638.25	8305.33	6835.01	4884.95
	Pos_05884	Positive	(M+H-2H2O)+	Pioglitazone	321.113	34.135	0.405559	1.41144	0.0483053	12929.8	19786.2	11389	11684.6	17902	10949.9	22768.4	13880	20964	23596.9	24967.5	13289.6	14438.8	20118.9
	Pos_03825	Positive	(M+H)+	L-Fucose-1-phosphate	245.042	337.43	0.404235	2.8511	7.28479e-09	1565.69	1626.42	1794.33	1864.78	2018.17	2030.84	4890.99	5959	4890.52	5258.82	5240.96	4837.38	3328.85	2313.42
	Pos_06368	Positive	(M+K)+	His-Phe	341.108	378.026	0.403115	1.75211	1.47803e-05	3999.46	3969.85	4025.78	5557.71	6489.13	4585.77	8075.71	8631.98	7904.88	9103.15	8287.93	8155.21	6959.38	6683.48
	Neg_02793	Negative	M-	Acephate	183.008	33.993	0.4024	1.26601	0.196451	33754.9	18824.8	32927.6	33384.6	31947.4	29015.4	26510.3	62304.7	41470.1	32369.2	30858.5	34185.6	42492.2	45904.4
	Pos_04389	Positive	(M+H)+	Phe-Val	265.155	180.282	0.398488	0.275207	3.35997e-07	4198.27	4887	3894.84	3950.77	5263.41	5163.97	1430.27	861.271	924.083	1327.43	1394.61	1591.52	2410.85	3099.61
	Pos_04091	Positive	M+	Midodrine	254.121	367.829	0.397799	2.0687	2.77561e-05	3260.63	2455.79	2608.04	3077.97	4018.59	4149.33	6780.65	7715.63	6774.03	6588.67	7564.48	5061.67	5114.68	4280.03
	Pos_04993	Positive	(M+Na)+	Oxprenolol	288.163	386.324	0.395429	2.04937	3.67843e-07	3359.59	2713.54	3365.69	2648.91	3448.12	3270.07	6312.51	6514.41	5961.07	7549.47	5992.91	6209.93	3144.02	4654.75
	Pos_07278	Positive	(M+K)+	Acebutolol	375.17	228.234	0.39542	3.21916	4.88878e-07	1529.25	1384.77	1442.42	1662.98	1341.15	1499.62	3867.84	5972.37	4844.78	4590.03	4408.84	4838.49	3247.04	2214.15
	Pos_01901	Positive	M+	DL-Arginine	174.111	236.408	0.39531	1.44902	0.013308	11140.5	9762.14	9271.81	10920.1	10175.1	10132.4	11959.4	14775.6	13120.4	22065	14213.7	12838.7	16147.1	9837.11
	Pos_04616	Positive	(M+H-H2O)+	Cyclopentolate	274.176	338.938	0.394137	2.08209	0.00027374	3669.97	3765.88	3671.52	4371.1	4312.16	368.913	6851.52	6330.84	7735.12	7068.46	7706.03	6282.02	6189.81	4297.71
	Pos_04761	Positive	M+	Phe-Asp	280.104	270.883	0.392102	1.96281	8.19045e-05	3111.85	2923.65	3723.52	3747.92	3629.79	4446.51	8363.02	6801.74	6969.41	6037.15	8614.45	5577.96	5493.16	5222.43
	Neg_10925	Negative	(M-H2O-H)-	Cortisol 21-acetate	385.196	325.857	0.390613	0.639445	3.82607e-08	8346.9	9049.52	8271.51	9055.44	8895.22	8860.32	5393.92	6136.71	5901.65	5443.17	5055.06	5626.89	7767.59	7568.41
	Pos_01868	Positive	(2M+H)+	Diacetyl	173.08	194.2	0.390584	0.760627	0.00059184	12547.5	17554.2	14247.5	14352.2	15957.7	15989.8	11376.9	11592.3	11598.5	12106.1	10915.5	11360.6	15742.6	13779.5
	Neg_00683	Negative	(M-H)-	2-Hydroxy-3-methylbutyric acid	117.054	254.38	0.390563	0.538927	2.06526e-07	7308.95	7397.07	6258.44	6936.1	7121.62	6363.35	3319.8	3580.65	3577.74	4377.86	3440.37	4007.37	5287.76	5225.63
	Neg_13223	Negative	(M-H)-	Estriol 16.alpha.-(.beta.-D-glucuronide)	463.192	263.908	0.389459	0.589277	4.12227e-06	8116.33	8464.99	7892.27	9119.65	7380.41	6722.51	4550.74	4435.16	5049.01	4996.51	4318.5	4756.33	6162.46	4726.4
	Pos_07882	Positive	(M+K)+	1-Stearoyl-rac-glycerol	397.279	43.1215	0.387109	1.23512	0.122072	31324.5	25998.9	32417.1	15878.7	34983	29601.2	36035.5	39829	27095.9	31393.4	30232.3	45636.1	26519	31717.9
	Pos_02457	Positive	(M+NH4)+	N-Formylmethionine	195.075	366.476	0.386396	1.85128	1.23203e-05	3327.04	3896.09	3445.59	4095.04	4598.2	3796.11	7213.93	7316.46	7242.43	8227.88	5479.34	7391.9	5866.41	4634.54
	Pos_01404	Positive	(M+Na)+	Ethyl hydrogen malonate	155.033	238.934	0.385552	1.99387	0.000114369	3024.68	2674.44	2841.4	5063.07	3358.82	3656.01	7902.4	5612.05	6522.57	7743.1	5675.26	7655.15	3911.88	5595.87
	Pos_01926	Positive	(M+H)+	N2-Acetyl-L-ornithine	175.107	376.338	0.382158	1.31866	0.00323644	10803.3	12139.2	11149.6	12884.6	15145.2	11347.5	14262.7	15542.9	15838.1	19828.5	15611.5	15797.5	14703.9	15553.6
	Neg_08135	Negative	(M+CH3COO)-	6-Hydroxymelatonin	307.125	200.655	0.38206	1.98659	1.64577e-07	3662.57	2969.43	2541.54	2629.64	3329.64	3353.61	6107.87	6728.64	5811.83	6206.48	6236.41	5633.75	4865.23	3250.46
	Neg_15833	Negative	(M+CH3COO)-	Taurochenodeoxycholate	558.305	157.171	0.381494	0.617271	9.95746e-07	8899.92	7133.16	8223.23	8303.07	8279.11	7615.07	4355.51	5347.13	4991.25	4771.4	5288.51	5155.18	7599.13	7248.33
	Pos_03284	Positive	(M+H-H2O)+	Lys-Pro	226.158	138.071	0.378685	1.30521	0.240742	52529.4	22728.1	22647.5	16931.6	14697.2	16829.2	33359.2	38379	28601.3	29281.8	30598.9	30814	25238.7	15744.7
	Neg_07911	Negative	(M+CH3COO)-	Pentadecanoic Acid	301.243	30.814	0.376939	0.524661	0.31001	48149.9	45049.9	3704.2	2638.88	1963.43	17719.7	12797.1	8057.5	7653.31	10510.5	11297.7	12237.1	23611.2	18092.5
	Neg_04228	Negative	(M-H)-	Primidone	217.102	199.335	0.376596	1.14627	0.0301087	35637.8	32661.7	34538.1	27142.1	26634.8	28947	35514.7	35343.1	35746.1	34145.5	32895.6	39058.7	35638.9	29727.7
	Neg_02980	Negative	(M-H)-	Glycyl-L-leucine	187.104	273.525	0.375398	0.69676	1.00861e-06	10860.5	10352	9491.66	8967.47	9568.21	9958.01	6881.78	7038.69	6933.57	6903.72	6523.63	6965.27	6705.83	6687.73
	Neg_01157	Negative	(M+CH3COO)-	Propylene glycol	135.063	129.484	0.371198	0.901282	0.0218824	39429.7	41138.7	41395	44925.3	44321.3	42556.7	40679.9	35600.1	35748.6	34817.8	39448.4	42420.4	38747.7	43573.8
	Pos_05136	Positive	(M+H-2H2O)+	Tyr-Phe	293.135	243.525	0.371065	1.39345	2.89868e-05	8082.07	8548.15	8011.84	8140.23	6602.82	6559.12	9957.12	11003.7	10630.4	10908.7	11429.8	10091.3	6980.97	9968.51
	Pos_07203	Positive	(M+NH4)+	Vincamine	372.232	89.483	0.370921	0.890257	0.46972	68379.8	80985.6	70934.6	94599.1	152356	133182	83798.7	79887.5	93611.6	89970	102459	84816.5	103329	79884.7
	Pos_02458	Positive	(M+H)+	Caffeine	195.084	333.495	0.370128	2.11801	2.07604e-05	2396.17	2450.6	2257.46	2049.77	3448.58	3561.45	5022.16	6243.06	5542.05	6133.62	6595.33	4699.36	3864.45	2737.2
	Neg_01591	Negative	(M+CH3COO)-	DL-lactate	149.042	291.48	0.368013	0.793954	1.35608e-06	12635.8	13873.3	14014	14400.6	14267.7	13791.1	10893.8	11277.5	10902.9	11293.7	10565.6	10950.9	11690.9	13630.9
	Neg_00673	Negative	(M-H)-	Methylmalonic acid	117.017	446.97	0.367911	1.41451	0.0317436	11459.1	7787.86	9911.5	9251.85	9452.05	15198.7	16915	19268.9	16243.7	9414.01	13426.5	13932.6	11163.2	9799.45
	Pos_04571	Positive	(M+H-2H2O)+	Deoxyuridine monophosphate (dUMP)	273.033	136.18	0.366376	1.52745	3.28898e-06	5521.94	5274.23	4798.19	5313.51	6107.65	5938.01	8320.18	8004.64	8217.25	8360.23	7874.52	9558.09	4529.69	5871.48
	Pos_04862	Positive	(M+Na)+	Lys-Asp	284.116	359.605	0.366219	1.6032	6.15008e-05	4377.14	4462.56	4266.74	6150.63	6318.57	4787.73	7966.13	8207.8	8011.84	8496.24	7018.11	8978.46	5655.29	5932.6
	Pos_01837	Positive	(M+H-H2O)+	N-Acetyl-L-glutamic acid	172.059	374.154	0.359997	1.48488	0.000116719	5105.85	5324.52	5641.73	6806.89	7901.63	6200.09	8239.11	9144.62	9443.09	9967.77	9264.36	8853.16	8602.13	7152.49
	Neg_09325	Negative	(2M-H)-	DL-3,4-Dihydroxyphenyl glycol	339.105	22.5865	0.357588	1.29505	0.20291	28630.1	27807.3	26773.9	18835.8	21608.6	12097.3	38092.5	11549.6	23214.1	35880.7	31931.9	35138.8	17195	36507.6
	Neg_12109	Negative	(2M-H)-	m-Chlorohippuric acid	425.023	26.1015	0.356616	1.36056	0.0275173	15144.2	10874.4	11526.7	12130	13928	4814.56	14601	15949.9	14478.9	15489.6	14230.7	18336.3	5180.97	18304.5
	Pos_00624	Positive	(M+NH4)+	Succinic semialdehyde	120.065	361.094	0.356491	0.650058	0.0101866	8001.19	9810.79	9131.82	9821.66	14397.6	9226.7	5836.72	5290	5535.44	9597.53	6214.08	6783.11	10890.9	10557.2
	Pos_05353	Positive	(M+Na)+	Pro-Tyr	301.12	242.008	0.352407	1.72724	0.00140168	4049.51	3674.1	3814.09	4755.76	4346.85	5072.84	8678.38	7155.75	9140.48	5917.48	5023.79	8496.87	6578.86	5668.11
	Pos_05578	Positive	(M+Na)+	Zolmitriptan	310.16	336.085	0.350255	2.263	0.000300989	2887.69	2356.38	461.582	2398.87	2406.43	3144.99	4917.27	3460.14	5518.86	5643.44	5984.32	5379.36	4537	3563.94
	Neg_02258	Negative	(M-H)-	Gallic acid	169.011	346.78	0.350242	1.27493	1.2619e-05	9415.99	8852.12	9511.29	10478	9744.51	10120.5	11711	12898.3	13108.7	12588.2	11968.2	11828	10010.2	10543
	Pos_05436	Positive	(M+H-2H2O)+	Propoxyphene	304.201	239.531	0.349413	1.76884	2.94425e-05	3576.7	3157.62	3531.17	3890.51	3485.23	3321.34	6878.55	6948.86	6128.47	4786.51	6820.22	5516.89	6183.44	3659.34
	Pos_01255	Positive	(M+NH4)+	Itaconic acid	148.06	363.958	0.348023	1.49615	0.00125937	5436.67	5626.45	5153.54	6495.35	7123.19	6518.95	7913.79	9272.45	11877.1	8956.17	8238.59	8133.11	8419.28	10019.4
	Pos_02199	Positive	(M+NH4)+	3-Methoxytyramine	185.133	35.7005	0.343235	1.22096	0.417358	32481.2	45543.6	41764.7	52735.9	49894.5	55355.2	76203.3	39352.2	15238.1	79870.4	42026.3	86461.8	18787	68520.8
	Pos_04504	Positive	(M+Na)+	Lys-Thr	270.145	391.454	0.342536	1.7761	0.000271264	3052.96	3106.16	3052.33	3875.56	4101.18	4156.44	7502.46	4949.69	7193.52	7230.83	5549.62	5484.07	5357.4	4950.98
	Pos_05802	Positive	(M+H)+	Ile-Trp	318.18	280.65	0.342206	3.159	3.09826e-06	837.934	1195.84	1045.29	964.3	1414.31	1499.93	3703.68	3875.78	3396.67	4027.01	4362.26	2613.65	2146.96	1816.16
	Pos_04275	Positive	(M+H)+	Lys-Leu	260.196	367.87	0.341435	1.51681	0.000296756	4354.58	6829.91	4288	6530.12	5199.32	4690.99	7657.06	7371.42	8075.56	8980.33	8348.95	7942.28	9671.5	7323.65
	Pos_03684	Positive	(M+Na)+	Securinine	240.096	308.387	0.340811	1.79986	0.000156681	3166.61	2794.84	3185.28	3210.41	3399.09	4163.64	6017.69	6816.87	5442.79	4945.9	7498.55	5131.18	5179.69	3835.02
	Neg_00524	Negative	(M-H)-	2-Furoic acid	111.007	434.997	0.338373	1.66641	0.00052092	4636.03	3479.94	4030.73	3631.82	3624.97	4984.8	6388.59	8308.37	5894.25	5615.65	8171.75	6262.19	5675.9	4792.48
	Pos_01239	Positive	(M+H-H2O)+	Kynuramine	147.091	176.323	0.33707	1.8097	0.00713584	4608.07	4140.47	4220.45	2609.7	3860.77	4159.41	8002.27	4268.29	4350.01	8833.54	9052.46	8200.31	3689.34	5923.06
	Neg_05885	Negative	(2M-H)-	Ammeline	253.094	25.976	0.332256	1.22437	0.414707	58994.7	23880.9	24200.9	24324.9	25834	52674.2	50388.8	30399.3	59327.8	25289.7	60243.1	31358	29736.9	26951.5
	Neg_01530	Negative	(M-H)-	(S)-2-Hydroxyglutarate	147.027	378.392	0.328932	0.661837	0.00908092	7288.58	7329.96	13230.5	9610.15	8531.41	8182.28	5407.37	5718.95	6001.11	6660.68	5279.49	6786.02	7187.19	8688.36
	Neg_01438	Negative	(M-H)-	4-Guanidinobutanoic acid	144.074	347.675	0.327572	0.405327	0.000110796	2863.1	3718.73	3934.01	4460.47	5450.07	3825	1150.39	1484.52	1407.35	2320.25	1511.07	1956.16	2584.88	3307.37
	Pos_04452	Positive	(M+H)+	Deoxyguanosine	268.104	222.723	0.327553	0.806821	0.128485	22620.8	23462.8	22774.4	25751.3	27591.2	24659.8	13762.6	15054.8	32080.7	21842.2	19318.6	16431.1	19925.8	18822.5
	Pos_02798	Positive	(M+NH4)+	Ala-Thr	208.126	255.577	0.326973	2.01039	9.03863e-05	2391.32	2159	2124.49	2432.37	2668.89	2521.54	3865.1	6033.36	5816.54	4083.51	4575.56	4369.73	4075.69	2886.54
	Pos_17644	Positive	M+	N-Docosanoyl-4-sphingenyl-1-O-phosphorylcholine	786.66	40.159	0.326282	0.337664	0.000602458	3285.01	5223.46	2107.04	3300.32	4786.99	4230.94	2258.48	1465.97	921.014	847.131	1212.89	1038.43	3267.16	3202.55
	Pos_10551	Positive	(M+H-H2O)+	Taurocholate	498.295	334.058	0.326281	1.86812	6.51797e-08	2528.01	2085.34	2284.33	2797.99	2628.43	2957.73	4901.18	4356.23	4870.5	4921.54	4753.61	4745.18	3725.35	3039.41
	Pos_03431	Positive	(M+H)+	Naproxen	231.107	382.831	0.326085	1.45647	0.138938	9447.48	6695.9	9595	11317.4	16727.2	9047.82	2359.59	20210	17577.8	17702.7	16815.9	16845.4	14874	1078.98
	Pos_02028	Positive	(M+H-2H2O)+	Pro-Val	179.117	326.879	0.324563	0.913934	0.00493654	31186.5	31599.1	32117	32516.9	33448	34189.4	28047.7	28455.8	29841.6	31885.6	28897.2	31141.3	39271.6	36983.2
	Neg_03536	Negative	(M-H2O-H)-	O-Succinyl-L-homoserine	200.06	287.93	0.323127	1.63779	4.8406e-05	3674.79	3243.08	4134.82	3291.46	3328.19	4105.69	5415.52	5503.66	5881.27	5763.42	7390.69	5713.38	4391.44	4367.72
	Pos_03897	Positive	(M+H)+	Val-Glu	247.128	368.47	0.321637	1.23884	0.0286957	10623.7	13847	13880.6	17530.5	14554.5	13346.4	15208.3	16703.5	21452.9	18340.9	16453.3	15634.4	17456.4	13594.6
	Neg_05254	Negative	(M-H)-	Bentazon	239.052	218.782	0.320485	0.849517	0.040164	19164	20938.5	27870.2	21020.8	25774.1	20356.1	19208.6	18948.7	19964.6	18390.4	18492.8	19784.8	18297.7	18252.7
	Neg_01967	Negative	(M-H)-	Indole-3-carboxylic acid	160.037	87.751	0.320359	1.10712	0.42572	74561.1	75266	74372.4	75421	73355	73450.9	59208	100354	75357.3	51886.4	105964	101478	66331.4	65686.2
	Pos_04553	Positive	(M+H)+	Pro-Arg	272.171	453.848	0.317888	0.663802	0.0132351	7091.02	7253.8	8332.5	9040.15	11481.8	8597.06	3846.42	4606.27	5022.84	8838.62	6331.06	5737.32	9043.41	7954.49
	Neg_07969	Negative	(M+CH3COO)-	Azacitidine	303.099	306.771	0.310367	1.43592	0.0584046	13043.5	6496.07	6203.73	7317.23	6318.56	7466.35	14598.5	14193.4	8891.22	12134.8	9927.28	7520.98	6795.74	5858.33
	Pos_06376	Positive	(2M+H)+	Levetiracetam	341.219	305.697	0.310327	2.37681	0.000662622	1538.07	1388.71	1429.24	2022.64	1536.13	2209.47	4863.8	3365.35	2836.4	3654.9	5843.98	3498.96	3541.19	1927.1
	Pos_01142	Positive	(M+H-H2O)+	N6-Methyl-L-lysine	143.117	355.164	0.310131	1.46985	1.59567e-05	4043.1	4069.46	3804.13	4685.13	4842.95	5517.53	6598.79	6349.43	6722.44	6475.34	6886.19	6598.28	6344.91	6042.77
	Neg_03141	Negative	(M+CH3COO)-	Ethylmalonic acid	191.052	261.36	0.30882	1.23198	0.0178884	13557	11569.2	12513.9	13243.6	11726.9	10862.6	13971.9	15262	16801.6	11147.4	16887.9	16447	13108.8	12932.8
	Pos_06458	Positive	(M+H)+	Thiamine monophosphate	345.08	341.693	0.306332	1.67507	0.000264701	2583.11	3132.26	3738.33	2993.06	4803.18	2504.55	4923.55	6384.89	5534.86	5349.1	5291.27	5606.41	2694.74	2126.3
	Neg_08178	Negative	(M-H)-	D-Ribulose 1,5-bisphosphate	308.973	45.617	0.305064	1.29448	0.150895	10714.2	15151	14060.3	16380	15393.9	14747.8	22398.4	24072.5	21552.5	21344.1	15499.2	7037.34	5413.87	17429.4
	Pos_03832	Positive	(M+H)+	Pro-Glu	245.113	408.175	0.301463	1.39185	0.0266294	5529.14	5844.97	6343.98	8891.06	10528.3	8067.47	10033.6	12441.1	11318.5	12629.8	8413.54	8082.07	9882.27	8433.3
	Pos_04016	Positive	(M+NH4)+	Lys-Ser	251.175	311.491	0.296959	2.03816	2.82667e-05	1518.42	1780.84	1957.33	2562.84	1213.6	2177.08	3708.99	3071.55	3826.36	3807.03	4470.16	3963.84	2222.74	1463.8
	Pos_03395	Positive	(M+H)+	Ergothioneine	230.111	362.307	0.29496	1.38049	0.000239087	4509.19	4901.85	4996.86	5381.91	5823.32	6527.59	7015.93	7366.97	7267.79	8308.17	7601.67	6809.27	13803.2	5033.64
	Neg_03634	Negative	(M-H2O-H)-	N-Acetyl-D-glucosamine	202.067	296.825	0.29422	0.766941	0.000821398	11266.4	8942.41	9022.83	9106.67	8091.26	8876.49	7380.59	6949.39	7000.94	7533.47	6695.18	6856.93	8917.84	7925.75
	Pos_00817	Positive	(M+H)+	Dihydro-4,4-dimethyl-2,3-furandione	129.054	336.179	0.293798	1.51294	1.39115e-07	3353.13	3155.63	3424.07	3723.23	3458.71	3894.75	5100.68	5632.9	5209.75	5084.64	5421.21	5337	5090.53	3638.8
	Neg_20670	Negative	(M-H)-	Ginsenoside Rg3	783.475	187.733	0.293436	1.62803	3.8985e-05	3399.15	3476.72	3031.99	2627.18	2779.23	3024.44	4932.25	5370.84	3973.03	4872.12	4989.98	5717.75	3628.44	4801.11
	Pos_01273	Positive	(M+H)+	trans-cinnamate	149.059	256.123	0.289587	1.31748	0.0111176	6860.85	7089.26	7597.26	8134.26	8067.41	8324.92	8201.49	12473.7	8602.32	12255.4	9502.27	9666.19	11586.8	9079.46
	Pos_01861	Positive	(M+Na)+	D-Ribose	173.043	237.882	0.284426	1.83134	0.00441942	2375.66	2186.67	2067.59	3698.71	2593.71	2866.45	4057.7	3015.15	4617.01	6563.39	4457.55	6203.76	3609.54	2666.23
	Neg_02464	Negative	(M-H)-	N-Acetyl-L-aspartic acid	174.037	374.054	0.277743	0.505092	0.000858745	2252.22	3202.46	3698.53	4234.51	4881.5	4175.69	1545.92	2285.82	1725.35	2222.98	1748.04	1808.62	2226.06	2900.65
	Neg_04975	Negative	(M+CH3COO)-	Lawsone	233.04	86.0295	0.277368	1.07965	0.331154	63351.8	57082.5	58407.6	60316.7	62971.1	60019.9	57742.1	58748.1	75203.7	56845.7	83360.2	59094.1	76808.7	60883.8
	Pos_00375	Positive	(M+H)+	Dimethylglycine	104.069	290.075	0.277285	0.819535	0.35908	25410.7	25672.4	25376	29357.3	31050.8	34751.9	17202.9	18542.4	15992.9	48904.1	19267.2	20738.3	51524.9	21603.7
	Pos_04116	Positive	(M+H-2H2O)+	(+)-Catechin	255.066	220.134	0.272384	1.64787	0.140344	5214.82	4634.27	4869.87	5220.2	5012.77	6268.73	3996.09	3550.69	4152.49	13230.1	13262.8	13255.6	10163.8	6638.47
	Pos_03354	Positive	(M+K)+	N-Carbamylglutamate	229.029	301.637	0.271866	3.05041	3.30439e-05	887.603	738.836	695.859	697.624	911.804	890.059	2890.39	2971.36	2052.04	1835.57	1950.27	3008.79	1630.13	899.685
	Neg_01202	Negative	(M-H)-	Salicylic acid	137.022	102.443	0.270803	0.942293	0.639754	192359	176557	173707	172636	169912	171796	194793	193802	105067	212812	192508	96991.6	189464	192235
	Pos_05746	Positive	(M+K)+	Venlafaxine	316.175	147.743	0.267563	1.10778	0.623296	106702	84317.9	72983.2	99208.5	38471.7	40241	32377.1	101146	92552.1	93097.7	79506.7	90875	106665	46614.3
	Pos_01162	Positive	(M+NH4)+	4-Imidazoleacetic acid	144.079	177.676	0.266742	1.28457	0.00197648	4985.75	6212.47	6029.63	7273.57	6807.9	7175.9	8144.39	7690.54	7959.19	8175.83	9513.39	7953.6	5154.07	5691.2
	Pos_05132	Positive	(M+Na)+	(-)-Medicarpin	293.085	255.392	0.260437	2.26303	0.000449435	1379.35	1233.16	851.761	1566.73	1551.49	1112.94	2905.21	3849.46	3061.78	2087.79	2050.94	3459.82	2573.22	2162.6
	Neg_00997	Negative	(M-H)-	N-Acetyl-L-alanine	130.048	247.601	0.260079	0.692954	0.27926	12792.7	13185.5	13329.4	12999.8	15437.7	12876	5464.84	5954.25	27184	6104.94	4702.97	6455.74	9866.29	9420.68
	Neg_07461	Negative	(M-H)-	Picrotoxinin	291.09	246.276	0.259698	0.673375	0.0005549	5043.87	4466.27	4631.85	4594.14	4645.57	6540.25	3269.67	3252.14	3402.98	3541.62	3531.54	3150.74	3313.63	2573.83
	Neg_11220	Negative	(M+CH3COO)-	beta-Nicotinamide D-ribonucleotide	394.079	197.527	0.258064	0.809578	0.00603809	8246.79	9076.74	8992.37	11147.1	10633.5	8215.66	8089.43	7406.55	7275.03	7622.74	7539.8	7655.52	9021.31	10478.1
	Neg_07823	Negative	(2M-H)-	D-Lyxose	299.104	344.425	0.257257	0.86566	0.0566638	17319.4	17780.1	17755.5	17981.1	18420.7	17102.3	12638	17556.8	13480.2	19008.5	16365.4	13022	17130.6	17901.4
	Neg_08197	Negative	M-	N-Acetylneuraminic acid	309.103	178.208	0.255371	1.47088	0.0887673	2419.5	1591.16	7263.93	7433.96	7511.63	7104.67	8825.68	8643.8	9072.79	4158.46	9183.11	9132.91	2667.77	9174.27
	Neg_04304	Negative	(2M-H)-	Pyrocatechol	219.071	180	0.253727	1.51836	0.078684	1313.43	2276.63	3494.42	5386.48	8738.62	8500.03	7190.26	7716.31	7453.46	6505.26	8084.5	8160.01	6695.72	6533.38
	Neg_09764	Negative	(2M-H)-	5,6,7,8-tetrahydro-2-Naphthoic Acid	351.169	317.616	0.253587	1.2677	0.206333	15437.1	15527.3	349.633	14245.3	13704.5	14974.2	17172	16025	15050.2	14591.5	16043	15229.7	15914.3	14868.2
	Pos_05131	Positive	(M+Na)+	Isoimperatorin	293.086	383.704	0.25067	1.32737	0.00674304	5838.22	5154.57	4524.31	5012.72	5611.43	5459.76	5340.95	5891.98	8425.45	7295.91	7526.73	7465.36	7358.1	7283.57
	Neg_06071	Negative	M-	3'-O-methylcytidine	257.096	346.166	0.243616	1.14575	0.00903708	11086.5	10365.2	11561.1	12368.2	10812.9	11873.8	11093.7	13369.2	14167.1	13175.9	13134.5	13048.2	11229.6	11650.9
	Pos_04127	Positive	(M+H)+	His-Val	255.145	389.505	0.241691	1.39968	0.0166977	4039.57	4143.89	4631.55	4542.43	3675.52	5427.69	4798.37	4507.18	5584.31	7432.95	7166.34	7547.17	5747.59	5221.04
	Pos_04484	Positive	(M+H)+	His-Ile	269.16	430.618	0.241153	1.53921	0.000595723	2007.51	2157.53	2126.15	2980.22	3303.72	3188.67	3788.03	3859.38	3597.86	4078.92	4644.83	4294.73	3511.49	2612.86
	Pos_00147	Positive	(M+H-H2O)+	1-Aminocyclopropanecarboxylic acid	84.0431	385.774	0.240439	0.767436	0.103241	6697.65	7669.28	7982.41	10852.5	14014.4	11318.6	5521.65	7069.37	7445.24	9740.25	7198.11	7947.12	11551.8	14468.3
	Neg_07811	Negative	(2M-H)-	meso-Tartaric acid	299.032	412.047	0.239316	1.45896	0.269751	5326.79	4814.11	16773.7	5473.63	5525.8	6187.71	8693.74	9078.09	9127.01	21555.9	7496.93	8391.01	6197.01	19228.9
	Pos_03241	Positive	(M+H)+	Flavanone	225.094	372.394	0.23786	1.41596	0.00622378	3599.56	3005.64	3614.22	3683.83	4673.73	3772.21	4221.2	5827.69	6121.09	6135.76	5375.34	3964.44	5009.18	4529.8
	Pos_03247	Positive	(M+NH4)+	Phenylpropionylglycine	225.13	226.155	0.23643	1.15584	0.604201	56721	31475.3	58287.4	57467.6	34141.3	23805	43957.6	37488.2	33645	104492	35799.6	47329	35935.3	25182.6
	Pos_02518	Positive	(M+NH4)+	3,4-Methylenedioxyamphetamine	197.128	212.665	0.235623	1.24547	0.00326792	5058.33	6300.47	5612.43	6488.22	6910.93	5631.84	6807.63	8543.03	7222.07	7057.64	7941.02	7268.32	7051.9	5460.6
	Neg_02617	Negative	(M-H)-	Cyclohexylsulfamate	178.05	52.399	0.233171	0.963018	0.59258	169539	156034	145480	172548	174836	164677	180387	145569	122719	179706	176558	141817	148415	132783
	Neg_01972	Negative	(M-H)-	DL-2-Aminoadipic acid	160.058	392.423	0.228237	0.483693	0.000489685	1674.21	1960.51	2276.47	3337.11	2485.43	2647.14	928.724	1124.13	1203.89	1391.27	1162.99	1144.93	1723.56	1894.55
	Pos_17642	Positive	(M+H)+	1,2-dioleoyl-sn-glycero-3-phosphatidylcholine	786.618	48.569	0.227748	0.818859	0.103745	13660.8	11838.8	10900.1	12383.3	9036.37	14336.4	11709.6	10294.1	6738.21	7227.5	11495.1	11620.7	15240.1	10389.9
	Neg_12165	Negative	(M-H2O-H)-	CDP-Ethanolamine	427.047	25.0835	0.227612	1.1563	0.460961	27894.1	29318.1	27093.1	24992.2	30853.4	34692	47131.7	26398.8	44250.8	47238.8	15745.5	21404.8	18136.1	44134.6
	Pos_00748	Positive	(M+H)+	5-Methylcytosine	126.065	183.094	0.227538	1.31592	0.0150939	3910.14	3998.4	6094.48	4821.26	6171.24	5118.15	8300.89	6639.87	6069.63	6557.58	5742.4	6316.74	5019.09	4553.87
	Neg_03755	Negative	(M+CH3COO)-	L-Glutamine	205.082	86.6095	0.227358	1.04645	0.333719	72270.2	67900.3	68038.1	67337.7	69149.1	75897.4	64533.1	67773	83223	70177.9	78963	75458.2	70572.5	72378.6
	Pos_03443	Positive	(M+H-2H2O)+	Desipramine	231.17	365.283	0.226214	1.12362	0.0606157	14564.3	15119.8	13496.8	16951.6	17112.3	15193.4	14890.8	16445.1	16682.1	19879.6	18154.2	17813.4	18582.5	16571
	Neg_03099	Negative	(M+CH3COO)-	Propionylglycine	190.072	203.873	0.224475	1.32815	4.87727e-05	3368.36	3582.42	3343.68	3638.29	3468.71	3113.23	3841.66	4643.33	4711.31	4563.39	4870.51	4616.45	2943.93	3875.16
	Pos_01725	Positive	(M+NH4)+	(+)-Methamphetamine	167.153	156.025	0.223595	1.54227	0.366674	2780.58	15207.1	2196.55	3654.08	16341.2	2893.22	6781.64	10821.4	6812.21	7350.48	8491.29	26172.8	5023.2	7114.89
	Pos_03050	Positive	(M+H)+	Ala-Lys	218.149	434.014	0.220195	0.719593	0.0319606	4384.52	4756.94	4581.54	5897.13	7431.73	5863.21	3179.63	2877.97	3371.61	5377.36	4748.34	4130.54	7378.06	6349.96
	Neg_16202	Negative	(M-H)-	Zafirlukast	574.213	44.946	0.22018	0.826078	0.522063	32231.8	32142.5	5961.8	39726.1	33405.5	30826.8	18690.1	9596.24	41808.8	18493.6	42538.2	12853.8	38466.3	48603.9
	Neg_03512	Negative	(M-H)-	Cysteine-S-sulfate	199.965	296.149	0.218761	0.556537	0.00610053	2928.64	3509.93	3116.48	2799.34	2911.26	2539.92	932.302	3372.2	1210.17	1525.81	1335.49	1533.48	2119.93	2216.79
	Pos_01504	Positive	(M+Na)+	Acetic acid, phenyl ester	159.043	191.823	0.217614	1.3203	0.00200278	3559.14	3289.07	4097.98	3773.81	3437.73	4258.87	5617.55	4826.17	5201.78	3885.14	5264.24	4801.71	4742.91	4909.25
	Neg_03989	Negative	(M+CH3COO)-	4-Acetoxyphenol	211.056	344.425	0.2166	1.22863	3.48748e-05	4382.47	4334.68	4717.88	4994.97	4484.7	4529.11	5530.09	5843.4	5379.28	5870.87	5257.23	5837.32	4818.23	4981.38
	Pos_01793	Positive	(M+H)+	3-Methyl-L-histidine	170.092	177.279	0.215979	1.98323	3.1541e-05	812.611	935.369	1220.96	1107.52	1435.8	873.472	2582.75	1885.32	2034.11	1890.89	2003.14	2268.17	998.965	1618.53
	Neg_02267	Negative	(M-H)-	Penicillic Acid	169.046	200.033	0.21359	1.12832	0.209509	23012.2	14696.6	15041.4	22380.3	17474.1	13927.4	20811.4	19823	21883	19007.8	19327.2	19349.6	24591.2	17815.2
	Pos_05214	Positive	(M+H-2H2O)+	Zotepine	296.067	375.803	0.211006	2.31912	0.00419028	789.545	743.197	834.807	974.204	1500.01	619.551	1809.5	2146.18	1347	1409.58	3096.64	2856.53	1852.56	1259.75
	Pos_03724	Positive	(M+H)+	L-Anserine	241.13	408.33	0.210517	1.8725	1.56079e-05	920.81	1092.2	1113.22	934.95	1431.05	1229.86	2222.55	1905.68	1842.69	2329.05	2387.5	1899.64	1654.13	1403.72
	Pos_03081	Positive	(M+H)+	Ala-Glu	219.097	405.12	0.208091	1.30312	0.03927	3719.24	3357.01	3748.67	6247.37	6863.48	5755.63	6089.33	6866.61	6209.59	6802.62	6474.51	6248.69	6286.66	5016.6
	Pos_00508	Positive	(M+H-2H2O)+	Cuminaldehyde	113.078	335.715	0.205988	2.51109	0.00224856	1090.55	375.597	460.656	527.027	469.974	1390.03	2039.31	2031.1	1950.1	1883.23	793.513	2135.2	2045.03	1445.69
	Pos_01713	Positive	(M+H)+	Phenyllactic acid	167.069	337.107	0.205222	1.70354	0.014899	1484.68	1536.74	1809.73	1832.72	2122.06	2002.91	3788.08	4193.23	2933.4	3736.82	1632.77	2094.92	2674.98	1282.53
	Pos_02812	Positive	(2M+H)+	3-Mercapto-2-butanone	209.065	295.475	0.205201	0.634859	0.213486	2619.25	2308.23	1921.24	9000.96	9944.17	9006.48	4004.89	3654.91	3972.01	3917.53	3813.55	2730.41	14402	11379.1
	Pos_05133	Positive	(M+H)+	EDTA	293.098	417.219	0.203112	1.17767	0.273334	9180.19	10988.8	11741.1	18991.2	20881.2	16268	19355.3	16680.1	18072.8	20794.3	12745.9	16046.3	11447.5	19610.8
	Neg_03380	Negative	(M-H)-	DL-Vanillylmandelic acid	197.041	104.197	0.201781	1.08773	0.66427	56279.4	60333.8	55804.5	39914.3	56344.1	129391	71516.6	70308	76855.7	72157.5	67072.5	75079	72386.6	73618.4
	Pos_02135	Positive	(M+Na)+	Methacholine	183.12	225.987	0.194554	1.44026	0.137977	4080.56	3648.98	3533.11	3902.42	4159.67	3634.38	1946.53	2676.67	6556.17	8104.89	7045.8	6737.02	3135.6	3131.12
	Neg_02075	Negative	(M-H)-	L-Rhamnose	163.057	217.169	0.194008	0.864292	0.338025	19198.3	16692.3	15510.9	31682.8	14522.3	17891.9	16261.9	17107.2	16938.4	15537.5	16285	17694.3	33846.9	28429.8
	Neg_07123	Negative	(2M-H)-	Alloxan	282.996	44.121	0.193331	0.818164	0.535548	21508.6	24882.5	19259.7	23375.4	10293.6	24960.7	29784.7	9555.81	9309.22	37411.4	4944.22	10676.3	23968.7	35138.7
	Neg_21437	Negative	(M-H)-	Glycyrrhizic Acid	821.385	44.733	0.188114	1.1536	0.176484	11423.9	12362.5	10733.9	10857.1	11307.8	11344	12183.4	14680.3	15026	11785.7	8425.83	16377.5	12828.2	9977.63
	Pos_01874	Positive	(M+H-H2O)+	N-(omega)-Hydroxyarginine	173.102	136.17	0.188098	1.14245	0.0924095	10741.7	9633.09	9309.75	10070.7	9734.27	9243.19	9257.76	11990.2	9737.61	9994.55	13508.9	12610.1	15826.4	10000.1
	Pos_03010	Positive	(M+H-H2O)+	Glu-Ser	217.082	312.214	0.187736	0.787393	0.460274	12761.2	14223.9	14170.6	14313.4	18173.7	14137.4	4413.82	23066.2	5293.99	6476.31	25035.1	4832.04	13816.9	11007.1
	Neg_10056	Negative	(M-H)-	Cortisone	359.194	44.421	0.179878	0.905041	0.728531	40829.4	42725.3	43086	37288	103863	35441.1	14822.7	26958.9	56942.6	59275.2	53998.8	62439.5	89487.7	12846.5
	Neg_06073	Negative	(M-H2O-H)-	L-Saccharopine	257.113	246.127	0.179781	1.46991	0.0200208	2261.28	1364.79	2386.15	2255.57	2240.27	2107.76	3234.51	3154.5	4282.8	2042.75	2396.31	3433.24	2394.35	2054.41
	Neg_02579	Negative	(M-H)-	4-Methoxycinnamic acid	177.052	86.9465	0.174576	0.961374	0.346472	59076.1	49756.1	52709.3	51847.7	59564.7	54079	49169.3	58180.8	54108.6	49503.5	52279.5	51159.2	54782	57734.6
	Neg_05985	Negative	(2M-H)-	Dihydrothymine	255.108	26.2375	0.173663	0.875609	0.669725	53297.9	45307.9	52317.8	37091.9	9012.39	53226.6	17365	61213.6	19689.8	9772.04	56202.7	54881.9	16899	19159.8
	Pos_05680	Positive	(M+H-2H2O)+	Ampicillin	314.093	217.899	0.172083	1.31558	0.252589	5137.42	5583.85	5331.74	5184.62	5134.23	5079.26	9332.01	10454.5	9495.6	5694.27	2365.98	4034.01	4905.33	4292.29
	Neg_07654	Negative	(2M-H)-	L-Arabinono-1,4-lactone	295.218	63.3305	0.170265	0.934751	0.154766	19495.7	20672.5	17360.5	20390	22643.5	18921.1	17200.9	20418.4	18782.6	18310.3	18347.7	18627.2	16504.3	17231
	Pos_01675	Positive	(M+H)+	2-Phenylbutyric acid	165.089	194.457	0.169258	1.09547	0.376482	18596.1	19320.2	18943.2	22953.1	20296.7	22964.4	16866.1	26213.6	27204.9	25087.4	23260.7	16191	28757.9	24852.8
	Pos_06858	Positive	(M+NH4)+	D-Maltose	360.15	387.13	0.167716	0.88867	0.415401	13619.4	20097.1	15335.4	18120.1	25217	14476.5	13570.5	15036.9	14382.9	23317.4	14226	14434.6	24596.2	14974
	Neg_01029	Negative	(M-H)-	3-Ureidopropionate	131.048	316.954	0.165244	1.48899	4.56547e-05	1232.96	1283.9	1392.94	1334.45	979.359	1192.82	1715.88	1955.27	1931.48	1609.56	1794.94	2035.83	1691.5	1559.94
	Pos_05376	Positive	(M+H)+	Pro-Trp	302.152	26.138	0.159824	1.37633	0.599723	3003.5	12592.2	6732.56	1518.09	3181.2	21490.4	10323.4	33583.3	1739.53	8216.47	4738.58	8175.37	4744.11	1364.28
	Neg_06559	Negative	(M-H)-	Galangin	269.051	26.83	0.158564	1.09009	0.709072	63669.6	10438.7	52139.7	60505.5	51407.1	19988.8	29367.6	59465.6	46563.4	40885.3	55252.9	49871	57914.4	63261.5
	Neg_04404	Negative	(M+CH3COO)-	3-Hydroxycoumarin	221.04	66.1675	0.157277	1.00893	0.830835	685404	695617	669412	635961	626098	762575	740915	649628	669315	640703	747331	663586	614726	921786
	Neg_13169	Negative	(M+CH3COO)-	Cortisone acetate	461.213	319.007	0.155107	0.584836	0.0432816	1700.69	1552.15	3606.91	1511.76	1904.61	1557.06	1703.42	1115	876.425	1238.43	927.406	1059.79	1392.55	1337.6
	Neg_01328	Negative	(M-H)-	5-Hydroxymethyluracil	141.027	252.367	0.153541	1.20543	0.108359	5694.97	4587.74	4297.01	2669.52	6027.47	5578.38	6527.73	5389.11	6035.46	5077.67	6313.53	5439.2	4762.44	4190.14
	Neg_05587	Negative	M-	Pinacidil	245.169	45.6405	0.153249	1.08451	0.261637	16361.1	14201	18767.7	15158.1	15692.1	15154.4	17076.5	19395.7	17126.7	13486.9	16523.9	19781.5	14482.4	15152
	Neg_15774	Negative	(M+CH3COO)-	Enterostatin human	555.281	289.04	0.151618	1.26454	0.0123384	2563.84	2803.92	2503.39	3038.8	1539.01	2378.18	3172.75	3284.35	3144.02	2952.52	3061.71	3134.21	3080.43	2743.27
	Pos_06043	Positive	(M+Na)+	Capsaicin	328.195	214.554	0.150205	1.08684	0.717359	58801	59444.3	57278.4	24378.4	16980.5	15824.2	36153.6	41869.6	40991	47787.4	44319.7	41793.2	50619.2	42206.1
	Pos_03499	Positive	(M+H)+	Thr-Leu	233.15	343.298	0.150147	1.18368	0.0461844	4519.6	3824.32	3018.2	5083.78	3716.36	4697.22	4972.46	5045.66	5391.89	4649.15	4840.74	4525.86	5839.62	5075.41
	Neg_01614	Negative	(M-H2O-H)-	L-Cysteic acid	149.983	45.588	0.147211	1.15821	0.622375	5632.97	8331.03	9387.42	30252.7	31875.5	28610.7	18469.9	37303.5	19845.8	18358.6	19437.8	18725.1	16238.9	16826
	Neg_03394	Negative	(M-H)-	Tacrine	197.113	110.171	0.14717	1.0306	0.834146	219231	210461	306502	229644	206489	211498	378415	209925	178803	220183	226278	212570	209805	213402
	Neg_03796	Negative	(M-H)-	N-Acetyl-L-phenylalanine	206.085	208.356	0.146783	1.65194	0.0408032	1149.5	1184.06	1153.49	1120.04	1055.25	1149.22	2416.3	1967.51	2406.88	1585.45	457.818	2418.31	2018.21	1285.33
	Pos_01602	Positive	(M+H)+	Bethanechol cation	162.138	374.764	0.146225	1.23831	0.0194443	2574.28	2496.22	2574.86	2980.19	3478.29	2736.77	2816.71	3824.5	3400.27	4119.72	3211.26	3481.5	3002.05	3339.79
	Neg_02652	Negative	(M-H)-	Caffeic Acid	179.031	339.805	0.143592	1.08979	0.0437941	7286.49	8465.59	8675.41	7481.38	7890.43	8303.93	8723.9	9439.39	8587.68	8175.07	8229.65	9266.97	7864.47	7937.25
	Neg_10050	Negative	(M+CH3COO)-	Salidroside	359.138	102.438	0.142982	0.964108	0.840096	137147	141528	175746	187412	188069	154744	177208	92702.1	136051	93494.2	266514	183336	222029	161518
	Pos_02783	Positive	(2M+H)+	4-Aminobutyric acid	207.137	193.268	0.14288	1.13325	0.392097	9334.87	11792	12600.7	10758.2	10270.6	13544.6	16311.5	18848.1	12268.4	10706	9103.01	10164.8	10767.4	9654.51
	Neg_09195	Negative	M-	S-Nitroso-L-glutathione	336.082	400.769	0.141563	0.824181	0.0352504	3133.63	3057.72	3397.67	3888.39	4312.21	4289.35	2912.99	2561.11	3143.19	3518.29	2863.04	3198.44	3465.83	4642.79
	Pos_01153	Positive	(M+NH4)+	Larixinic Acid	144.064	227.542	0.131239	1.09976	0.618347	21420	27773.8	24324.5	26629.5	30355.1	19930.9	20470.3	20814.1	22116.8	46941.4	19453.1	35645.5	21434.7	32213.7
	Pos_03194	Positive	(M+H)+	Phe-Gly	223.107	225.151	0.129883	1.09902	0.492	15255.5	15460.9	15065.2	15037.7	17034.2	14723.7	6527.52	19832.2	17985.9	20147.7	19076.1	18174.6	15983.3	10133
	Neg_09130	Negative	(M-H)-	Isopentenyladenosine	334.155	252.228	0.129586	1.15613	0.216367	6231.26	2386.96	6214.58	6109.64	5865.64	6456.07	6791.42	6180.97	6836.41	5841.89	6577.9	6229.16	3682.01	5592.64
	Neg_03910	Negative	(M+CH3COO)-	D-Xylose	209.072	25.3655	0.124676	0.965355	0.594559	54487.5	63145.2	47138.9	46736.4	49963.6	63275.2	53367.8	56089.1	49750.6	56445.2	49665.8	48177.4	54653.7	56377
	Pos_02105	Positive	(M+H)+	L-Tyrosine	182.08	234.214	0.124458	1.04962	0.550734	34556.3	38439.8	33195.8	35310.3	33872.1	39502.4	43498.7	34564.1	33544.2	32784.7	33017.6	48129.4	48438.4	32694.2
	Neg_05261	Negative	(M+CH3COO)-	Dulcin	239.102	391.014	0.124025	1.81777	0.156332	1017.88	877.178	802.615	979.396	941.909	757.227	2954.34	2748.31	500.209	735.535	513.807	2320.49	664.501	931.347
	Neg_00686	Negative	(M-H)-	2-Methyl-3-hydroxybutyric acid	117.054	234.538	0.123879	1.1109	0.00223648	3542.66	3542.91	3596.12	3511.08	3560.29	3320.8	3795.99	4235	4082.51	3797.54	3835	3664.8	3366.48	3343.72
	Pos_00539	Positive	(M+H)+	Dihydrouracil	115.05	306.961	0.123416	1.16916	0.406709	6390.83	7649.08	6256.43	7530.11	8103.03	7154.63	14033.5	5476.51	5998.92	6977.84	10901.5	6984.13	8236.68	8214.39
	Pos_17041	Positive	(M+Na)+	Thioetheramide-PC	758.572	141.457	0.12322	0.81775	0.387207	8225.92	6596.47	4149.97	5876.12	5397.9	6419.61	10426	4056.87	3388.49	3606.55	3848.75	4657.01	3701.68	5247.25
	Neg_01654	Negative	(M-H)-	2-Hydroxyphenylacetic acid	151.042	221.636	0.121219	1.21189	0.0370318	2224	2232.29	2826.56	2834.6	1996.14	1691.64	2998.73	2820.9	2563.73	2976.37	2835.7	2535.02	2449.58	1740.03
	Pos_03466	Positive	(M+H)+	Val-Asn	232.136	302.25	0.120131	1.15235	0.469578	6982.04	6938.26	7213.28	9757.84	9608.69	6857.24	8537.5	13419.6	12126.5	5521.04	10717.2	4250.29	8017.66	6236.34
	Pos_03143	Positive	(M+H)+	Met-Ala	221.102	247.089	0.119306	0.880775	0.280207	6660.05	6442.87	6518.26	6989.28	8350.01	7187.22	8075.94	6318.31	8231.39	5316.31	4667.12	4513.55	7947.17	7649.19
	Pos_02078	Positive	(2M+H)+	Methoxyacetic acid	181.071	54.61	0.118823	1.13284	0.679691	25260.5	15527.5	7204.88	13985.2	21628.8	14895.5	27584	11915	30949.2	5419.74	9577.98	26141.3	25441.7	25595.9
	Pos_01773	Positive	(M+H)+	Jasmine lactone	169.138	26.192	0.11606	1.41369	0.420027	2697.88	1589.95	2581.29	2547.65	2733.29	3104.82	8055.51	2016.3	6824.44	2045.45	1313.47	1310.49	1776.22	1789.66
	Neg_10533	Negative	(M+CH3COO)-	Dantrolene	373.083	135.994	0.106857	0.958011	0.638669	43204.4	38509.7	40081.4	27049.8	39638.4	35161.8	33501.8	31800.3	43781.9	29385.9	34775.7	41009.3	7560.76	39530.3
	Pos_00187	Positive	(M+H)+	4-Hydroxybutanoic acid lactone	87.0436	362.553	0.1067	1.0781	0.390663	10790.7	11016.5	9903.29	12904.5	12601.8	11772.2	11254.3	10917	10345.8	16326.4	12557.8	12975.9	12818.7	12392
	Neg_17604	Negative	(2M-H)-	5-Oxo-ETE	635.426	75.462	0.105518	0.797935	0.156154	2882.85	2707.71	2702.88	3028.91	2616.84	1909.76	841.231	2972.16	2779.18	2188.49	2009.64	1855.73	2303.51	2299.46
	Neg_02736	Negative	(M+CH3COO)-	D-Threitol	181.068	325.866	0.104088	1.10017	0.505193	5046.75	7423.41	13061.2	14882.1	13126.5	12812.7	12876.3	12023.6	11965.7	12554.5	12394.5	11184.9	11756.3	13544.7
	Neg_02537	Negative	(M-H2O-H)-	Glucosaminic acid	176.052	292.84	0.100837	0.910878	0.0620012	4006.22	4113.68	4360.31	3964.98	4102.17	4384.11	3470.27	4134.4	4073.92	3749.11	3178.59	4103.23	3686.86	3544.72
	Pos_05556	Positive	M+	Methadone	309.206	126.552	0.0994916	1.05299	0.849131	51266	91730.3	49465.5	93675.8	75786.3	73264.7	36505.3	59857.9	106575	50204.6	52624.8	152480	85193.9	83130.1
	Pos_01339	Positive	(M+H)+	2-Hydroxyadenine	152.056	254.797	0.0916511	1.02447	0.666601	51048.5	56503	57917.4	60596.6	68965.3	57090.5	58449.7	63063.6	56322.5	67727.4	62172.7	53003.2	43582.9	51272.8
	Neg_01461	Negative	(M-H)-	Oxoglutaric acid	145.011	72.3195	0.0884822	1.03852	0.655495	30257	31705.8	40448.9	30743.6	43704.5	31675.7	32197	34901.3	30607.5	40938.2	38824.2	39099.1	28222.8	26017.6
	Neg_07976	Negative	(2M-H)-	Xylitol	303.136	344.429	0.0878121	0.9091	0.504333	6856.32	10637.7	11230.2	6699.77	6560.47	7302.81	6637.39	10641.1	6936.75	6693.55	6848.06	7050.17	6762.57	6805.36
	Neg_11601	Negative	(M-H)-	Tamsulosin	407.157	102.126	0.0875575	1.0327	0.890246	147363	137484	137226	171090	142837	143980	205207	211619	66193.9	76725.4	93177.7	255836	225129	179205
	Pos_03147	Positive	(M+H)+	Thr-Thr	221.116	308.872	0.0844127	1.05659	0.520753	12021.3	11970	9993.24	14221.1	14560.2	12156.3	10522.7	16628.9	13359.5	12913.7	13345.4	12392.1	14451.9	13577.4
	Neg_01682	Negative	(M-H)-	4,6-Diamino-5-formamidopyrimidine	152.054	172.844	0.0826066	0.800572	0.220715	1871.51	1750.94	2004.04	1867.48	1949.81	1597.38	2126.59	2126.4	2003.45	842.441	886.893	853.474	1548.28	1263.77
	Neg_01943	Negative	(M-H)-	3-Methyladipic acid	159.062	280.783	0.0808002	1.08058	0.708931	22522.4	11907.9	11888.4	12134.5	23702.9	6867.72	18058.7	17528.8	18450.5	17150.8	8863.46	16144.7	13956.3	7551.1
	Pos_03870	Positive	(M+H)+	Val-Lys	246.181	374.77	0.0759899	0.903517	0.430849	3314.75	4272.32	4089.29	4762.61	5579.5	4256.93	3743.98	3093.32	4518.88	5568.67	2771.73	4043.7	4653.81	4061.83
	Pos_00949	Positive	(M+H-H2O)+	3-Hydroxyphenylacetic acid	135.043	318.459	0.0751036	1.05426	0.330013	6868.46	7348.37	6863.35	7045.23	8055.25	7895.85	7732.81	7151.61	7977.99	7002.72	7403.44	9199.75	9913.81	7910.38
	Neg_01941	Negative	(M-H)-	3,3-Dimethylglutaric acid	159.063	46.507	0.074509	1.03234	0.802377	27674.1	54860.8	53027.7	54285.6	31913.7	32584.8	40357.8	42460.1	46081.8	44185.1	44676.2	44810.6	58231.3	33136
	Pos_07958	Positive	(M+NH4)+	Farnesyl pyrophosphate	400.173	239.581	0.0730303	0.965352	0.583377	21652.7	16671.3	18011.8	21463.4	19981.5	21658.4	19405	19226.2	20243.1	17124.9	22477.9	16823.7	28337.2	17738.7
	Pos_00668	Positive	(M+H)+	Phenylethylamine	122.095	167.332	0.0715406	1.07978	0.637693	6706.81	7072.86	8084.31	12258	10478	12069.5	11323.8	12321.4	10894.1	11019.6	4417.53	11214.2	9092.2	6987.57
	Neg_10332	Negative	(2M-H)-	3,4-Dihydroxymandelic acid	367.073	374.005	0.0710082	1.20453	0.246757	843.588	1326.79	985.577	2120.77	1158.44	1945	1656.09	1415.41	1845.19	1844.55	1410.85	1922.05	1805.55	2451.79
	Pos_03817	Positive	(M+NH4)+	Myristoleic acid	244.226	221.913	0.0706465	0.808308	0.64904	3850.59	3477.2	3994.11	3926.43	3477.37	3991.79	1581.61	10771.1	1385.98	1453.06	1838.45	1332.57	1073.61	901.491
	Neg_02417	Negative	(M-H)-	cis-Aconitate	173.005	417.759	0.0704423	0.917773	0.474382	5615.57	5396.68	5583.58	6151.14	5477.72	6690.75	4017.75	4586.31	6947.88	6253.17	6753.17	3486.19	6484.8	6333.82
	Neg_03135	Negative	(M-H)-	Scopoletin	191.03	100.184	0.0679749	1.03532	0.919569	173853	99509.8	63855.2	181919	197188	70442.9	250595	74271.3	82878	257298	70427.7	79084.4	70714.5	117755
	Pos_00032	Positive	(M+H)+	Imidazole	69.0435	53.966	0.0679136	1.04091	0.798225	23190.7	29144.2	34006.6	39266.6	39402.4	45183.7	57753.5	29274.2	33415.6	36339.1	29563.1	32448.4	20594.6	39388.9
	Pos_14153	Positive	(M+Na)+	Neohesperidin	633.176	151.246	0.0677774	0.952284	0.786595	22620	17400.7	20694.9	20382.7	22393.6	21802.2	10024.9	19277.4	22108.8	16082.2	16505.5	35316.8	32765.6	34770.5
	Neg_04866	Negative	(2M-H)-	Fumarate	231.012	221.636	0.0654298	0.908962	0.749823	14036.2	13904.7	12766.9	3103.79	2224.45	14827.6	9902.54	4855.61	4525.05	11464.4	11215.6	13359.5	15402.7	3733.67
	Pos_00086	Positive	(M+H)+	Trimethylamine N-oxide	76.0746	319.06	0.0600746	0.944615	0.747439	18828.3	16595.1	14648	11174.4	9446.99	11668.7	21594.5	9903.53	11335.2	10521.4	11732.6	12712.7	16588.5	17415.8
	Neg_21469	Negative	(M-H)-	Nodularin	823.424	262.2	0.0562329	1.04565	0.11192	2890.53	2619.02	2808.07	2976.91	2839.5	2805.72	2781.09	2844.15	3167.11	2955.36	3029.45	2935.95	3035.83	2739.97
	Neg_12293	Negative	(M-H)-	Apigenin 7-glucoside	431.107	209.324	0.0553274	1.09125	0.523015	3624.79	3140.54	3311.58	3464.43	2016.01	3632.99	3734.83	3485.58	1727.49	4080.19	4073	3840.33	4396.44	2866.39
	Neg_01955	Negative	(M-H)-	(R)-2-Hydroxycaprylic acid	159.099	47.962	0.0533786	1.01227	0.88351	73036.5	69785	76521.5	76819.2	79436.5	72663	61474.8	76173.5	92139.7	84805.1	84160.5	55010.5	84682.8	89595.9
	Pos_00063	Positive	(M+H)+	Pyrrolidine	72.0796	267.639	0.0457395	1.0285	0.720172	11629	12074.6	11998.4	14848.2	14440.1	14836.8	12610.9	11491.6	13339.7	14583.4	17178.2	12898.4	17529.5	15782.2
	Neg_02130	Negative	(M-H)-	1,2-Benzenedicarboxylic acid	165.016	293.682	0.0455415	1.01541	0.915919	102629	111307	112580	110889	121682	116680	170622	72728.4	121197	146464	94313.9	80851.8	96872.2	91898
	Pos_02688	Positive	(M+H)+	Ala-Leu	203.138	254.671	0.0441832	1.02556	0.84955	31139.3	29730.1	29490.2	26452.5	25372.7	24427.4	27284.6	30001.9	29549.2	38095.7	12870.5	33069.4	30136.9	25588.8
	Neg_02193	Negative	(M-H)-	Vanillic acid	167.031	103.03	0.0394338	0.989381	0.932345	98364.9	72894.6	119444	153490	115823	100662	99387.3	86626	121564	90532.1	128700	126853	99200.6	119126
	Neg_11551	Negative	(M+CH3COO)-	11-Deoxycortisol	405.235	292.933	0.0380586	0.89365	0.774813	3448.08	3610.02	3272.41	3366.41	3450.63	3246.86	929.602	6931.9	883.569	1311.54	6900.73	1268.12	2551.67	2663.99
	Neg_02791	Negative	(M-H)-	2,4-Dinitrophenol	183.001	4.82	0.0355949	0.962078	0.745013	5393.55	5380.53	7857.74	5423.03	5424.76	5646.63	6481.45	5039.64	3322.83	5712.51	6581.9	6655.87	5492.83	6287.7
	Pos_01854	Positive	(M+NH4)+	Lavandulol	172.168	206.262	0.0324047	0.973019	0.791382	11502.9	10255.5	10824.9	8467.38	7271.4	10821.8	12457.3	8878.55	8516.71	9385.73	7558.81	10751	10774.1	10604.8
	Neg_12779	Negative	(2M-H)-	Sinapic acid	447.135	210.427	0.0316194	0.964794	0.489962	2459.25	2566.86	2710.83	2322.62	2457.6	2391.71	2553.49	1946.3	2213.6	2639.94	2562.72	2467.94	1823.07	2054.79
	Pos_01650	Positive	(M+H)+	Mephentermine	164.143	148.649	0.031333	1.11879	0.832144	436.968	6945.94	6488.28	1102.32	4568.13	1266.69	1281.65	2076.2	1452.62	9751.35	1650.55	7067.69	9044.08	7725.88
	Neg_11855	Negative	(M+CH3COO)-	Estradiol valerate	415.259	47.2075	0.0308443	0.97318	0.862077	17678.2	12506.8	11010.9	19929.3	13551.3	21228	11298	20263.2	15334	20893.3	12271.9	13271.8	13627.1	16703.9
	Neg_02659	Negative	(M-H)-	D-Mannose	179.052	166.18	0.0281151	1.02958	0.852165	9575.49	9189.41	9210.54	8958.79	8282.69	7715.57	7438.83	7821.07	8671.63	15663.3	7884.82	7018.44	10304.5	12085.9
	Neg_11440	Negative	(M+CH3COO)-	alpha,alpha-Trehalose	401.131	316.887	0.0279027	1.08745	0.640717	1391.98	935.43	1151.69	1598.73	1416.72	1293.75	2035.01	1574.43	1341.41	1624.45	444.105	1449.95	895.512	1393.45
	Neg_02730	Negative	(M-H)-	Homovanillic acid	181.046	44.052	0.0265318	0.996442	0.989113	110741	214876	228292	252123	248580	249098	316569	329931	141715	324879	148552	37426	126050	113437
	Neg_02507	Negative	(M-H)-	3-Isopropylmalate	175.057	416.445	0.0261872	0.985286	0.869418	9805.8	13873.3	9038	14949.7	13459.8	13596	13931.2	10916.6	11480	13124.9	11807.3	12363	28497.2	12947.8
	Pos_00324	Positive	(M+H)+	Cyclohexylamine	100.112	202.572	0.0241605	1.03743	0.874049	4649.25	5224.78	6249.12	10109.7	7595.31	10525.1	8974.71	1032.8	9338.04	10303.1	7997.51	8367.34	5364.22	6997.64
	Neg_01705	Negative	(M-H)-	2,3-Dihydroxybenzoic acid	153.016	317.599	0.0238739	1.00794	0.848453	19475.5	18035.6	17860.6	17877.1	18612.9	20449.2	17568.7	19716.6	21362.5	19196.8	17371.7	17986.6	21603.9	20203.1
	Pos_02372	Positive	(M+H)+	Thr-Ala	191.103	303.921	0.0159174	1.00987	0.883035	15064.6	14605.2	15624.5	18568.8	19219.3	17166.1	14172.9	16572.5	15595.1	17206.7	18276.1	19414.9	23334.7	18670.2
	Neg_11262	Negative	(M-H)-	pregnenolone sulfate	395.195	81.804	0.0148832	0.998031	0.883688	58686.8	58973.2	58386.5	59630.2	59218.9	60054.3	59121.1	59982.8	57819.4	59421.2	61564.8	56341.8	55203.3	47563.8
	Pos_06859	Positive	(M+NH4)+	Sucrose	360.15	355.443	0.0132221	0.991792	0.922342	5139.58	6473.21	6910.8	6101.87	7265.45	6304.97	8118.49	5617.22	5385.44	7018.09	5803.09	5940.03	7878.43	7057.9
	Pos_08098	Positive	(M+NH4)+	Trimethobenzamide	406.244	308.563	0.0101434	1.0135	0.887551	2755.64	2472.88	2928.6	2840.04	2791.26	2281.33	2813.78	3515.91	2462.79	2247.19	3174.32	2072.72	3707.09	2408.95
	Neg_02572	Negative	(M-H)-	L-Gulonic gamma-lactone	177.038	80.642	0.00576154	1.00432	0.98861	35633.9	22896.3	26097.6	37179.3	33804.2	34506.8	15596.7	15839.7	60384.2	20444	18364.2	60310.5	42382.4	42430.3
	Pos_03804	Positive	(M+H)+	Agomelatine	244.14	408.316	0.00184087	1.00148	0.991459	2025.37	2648.55	2393.78	2781.01	3126.63	1943.61	3301.12	3243.84	1637.06	2638.76	1988.01	2132.32	3070.81	3398.86
	Pos_04880	Positive	(M+H)+	Stearamide	284.294	33.403	0.00127125	1.00594	0.971257	71829.4	71646.4	66756	104707	116261	112433	142382	77395.8	74069.2	68621.7	83914.5	100479	95977.1	119593
	Pos_07705	Positive	(M+H)+	Dioctyl phthalate	391.289	32.598	5.56834	0.504889	0.104999	2.55056e+06	745025	905003	4.47518e+06	3.97819e+06	2.56763e+06	2.69605e+06	466555	1.6504e+06	758479	981111	1.13261e+06	1.02903e+06	3.32037e+06
	Pos_03372	Positive	(M+H)+	Ile-Pro	229.154	254.632	1.06478	0.666231	0.205618	235077	59105.5	231283	184056	266848	66642	119031	137841	159542	177076	52470.5	48925.9	288280	66442.8
	Neg_05970	Negative	(M-H2O-H)-	5-Methyl-2-thiouridine	255.045	84.3145	1.15296	1.35785	0.0880537	153614	140605	153680	147936	140234	150108	337965	182623	182942	180135	163490	156142	143539	183582
	Pos_07176	Positive	M+	Tamoxifen	371.228	88.922	1.29078	0.840338	0.208754	375881	419357	423488	690111	701795	461245	441077	373180	442671	475300	433107	416080	418631	464009
	Neg_05253	Negative	(M+CH3COO)-	Aspirin	239.051	42.606	1.28205	1.26775	0.272976	263572	755286	288349	276941	282887	293497	417114	506850	560335	415528	417465	421728	337651	331960
	Neg_10270	Negative	(M+CH3COO)-	Fluconazole	365.112	102.069	1.41721	1.54835	0.164376	229433	97742.1	73288.4	218577	222526	206088	133040	139642	398819	394594	156056	399981	284477	280419
	Neg_06061	Negative	(M-H)-	Alternariol	257.051	25.3655	1.48271	1.29849	0.0644521	278085	259663	292013	260686	261581	291616	375893	174969	331862	418031	428997	404497	262423	287376
	Pos_06296	Positive	(M+H)+	Erucamide	338.343	33.403	4.01987	0.630751	0.0566837	1.17124e+06	1.58535e+06	1.20926e+06	1.82979e+06	2.37607e+06	883401	1.60614e+06	669576	838426	926397	791906	879089	1.47639e+06	1.72348e+06
	Pos_01971	Positive	(M+H-H2O)+	D-Glucuronate	177.043	181.624	2.24969	1.61742	0.0869299	197880	344989	269708	435932	363804	350688	275067	277675	787671	750217	366175	718192	528546	569194
	Neg_09752	Negative	(2M-H)-	Glucuronolactone	351.052	26.669	1.479	0.359484	0.0654544	18607.2	173327	140423	199463	176880	22358.9	8280.79	30902.9	37315.5	27220.8	25679.3	133405	145554	17381.4
	Pos_01411	Positive	(M+Na)+	Hydroxyisocaproic acid	155.073	24.309	1.57353	8.66862	0.0523275	7920.54	7125.14	7386.8	2313.15	36125.6	8949.52	69618.9	70755.6	78807.8	296338	15661.5	74068.2	44882.9	10803
	Neg_01595	Negative	(M-H)-	3-Methylphenylacetic acid	149.058	101.165	1.68937	0.612024	0.0618043	398259	385547	383608	209008	143652	142533	175494	164078	169024	170101	173142	165717	224883	233508
	Pos_03273	Positive	(M+H)+	6-Benzylaminopurine	226.109	49.039	2.07478	3.23397	0.0536887	58426.3	76567.7	58656.4	73535.6	69400.7	79701.9	576620	157282	163808	165657	163227	119670	96513.4	125095
	Neg_06482	Negative	(2M-H)-	2'-Deoxy-D-ribose	267.114	72.665	2.07282	2.14968	0.109577	115256	244039	107515	112303	76374.6	295993	534221	579170	127745	117864	125922	560453	390816	388200
	Neg_01873	Negative	(M-H)-	Pelargonic acid	157.12	47.446	1.59403	1.17685	0.0893623	699052	473109	527043	495916	458091	651192	663949	709655	525198	714596	694160	581228	619018	631291
